# Supplementary material for: Methylation and gene expression patterns in adamantinomatous craniopharyngioma highlight a panel of genes associated with disease progression-free survival
Source: Front Endocrinol (Lausanne). 2025 Jun 12;16:1585618. doi: 10.3389/fendo.2025.1585618 (PMC12197951; doi:10.3389/fendo.2025.1585618)
Supplement: Supplementary file 7 [file Table4.xlsx]

## Sheet: TableS4_GenesDifferentialExpres
Table S4: List of 2,253 differentially expressed genes between ACP-B and ACP-A clusters obtained by DESeq2 analysis.
ensembl_ID	symbol	description	entrezgene_id	baseMean	log2FoldChange	lfcSE	stat	P-value	Padj	signal
ENSG00000000005	TNMD	tenomodulin [Source:HGNC Symbol;Acc:HGNC:17757]	64102	47.3551	4.35334	0.721282	6.03556	1.58417e-09	4.73176e-08	up-regulated
ENSG00000002587	HS3ST1	heparan sulfate-glucosamine 3-sulfotransferase 1 [Source:HGNC Symbol;Acc:HGNC:5194]	9957	670.331	2.36088	0.37941	6.2225	4.89282e-10	1.56646e-08	up-regulated
ENSG00000004776	HSPB6	heat shock protein family B (small) member 6 [Source:HGNC Symbol;Acc:HGNC:26511]	126393	1039.64	2.49188	0.580666	4.29141	1.77539e-05	0.000211409	up-regulated
ENSG00000004809	SLC22A16	solute carrier family 22 member 16 [Source:HGNC Symbol;Acc:HGNC:20302]	85413	34.162	-2.56625	0.477791	-5.37107	7.82713e-08	1.69231e-06	down-regulated
ENSG00000004838	ZMYND10	zinc finger MYND-type containing 10 [Source:HGNC Symbol;Acc:HGNC:19412]	51364	1033.57	5.2455	0.232356	22.5753	7.58398e-113	1.41919e-108	up-regulated
ENSG00000004848	ARX	aristaless related homeobox [Source:HGNC Symbol;Acc:HGNC:18060]	170302	49.6057	4.52167	0.832444	5.4318	5.57888e-08	1.24061e-06	up-regulated
ENSG00000005001	PRSS22	serine protease 22 [Source:HGNC Symbol;Acc:HGNC:14368]	64063	492.201	-2.12083	0.482208	-4.39816	1.09175e-05	0.000138461	down-regulated
ENSG00000005102	MEOX1	mesenchyme homeobox 1 [Source:HGNC Symbol;Acc:HGNC:7013]	4222	239.861	-4.05499	0.543251	-7.4643	8.37414e-14	4.20685e-12	down-regulated
ENSG00000005513	SOX8	SRY-box transcription factor 8 [Source:HGNC Symbol;Acc:HGNC:11203]	30812	592.085	3.9805	0.551452	7.21821	5.26774e-13	2.37579e-11	up-regulated
ENSG00000006016	CRLF1	cytokine receptor like factor 1 [Source:HGNC Symbol;Acc:HGNC:2364]	9244	2708.23	3.76103	0.375813	10.0077	1.40953e-23	1.76432e-21	up-regulated
ENSG00000006747	SCIN	scinderin [Source:HGNC Symbol;Acc:HGNC:21695]	85477	914.921	2.52268	0.47154	5.34987	8.80171e-08	1.87379e-06	up-regulated
ENSG00000007174	DNAH9	dynein axonemal heavy chain 9 [Source:HGNC Symbol;Acc:HGNC:2953]	1770	660.523	4.59845	0.552864	8.31751	8.98341e-17	6.30794e-15	up-regulated
ENSG00000007372	PAX6	paired box 6 [Source:HGNC Symbol;Acc:HGNC:8620]	5080	1028.51	2.03418	0.522511	3.89309	9.89734e-05	0.000920064	up-regulated
ENSG00000007516	BAIAP3	BAI1 associated protein 3 [Source:HGNC Symbol;Acc:HGNC:948]	8938	3714.96	2.64613	0.509679	5.19175	2.08323e-07	4.06078e-06	up-regulated
ENSG00000008394	MGST1	microsomal glutathione S-transferase 1 [Source:HGNC Symbol;Acc:HGNC:7061]	4257	2713.55	2.81658	0.505528	5.57155	2.52477e-08	6.07276e-07	up-regulated
ENSG00000010282	HHATL	hedgehog acyltransferase like [Source:HGNC Symbol;Acc:HGNC:13242]	57467	76.6039	3.57309	0.722303	4.94681	7.5439e-07	1.3005e-05	up-regulated
ENSG00000011201	ANOS1	anosmin 1 [Source:HGNC Symbol;Acc:HGNC:6211]	3730	2050.9	2.029	0.364933	5.55992	2.69894e-08	6.44229e-07	up-regulated
ENSG00000011332	DPF1	double PHD fingers 1 [Source:HGNC Symbol;Acc:HGNC:20225]	8193	135.39	2.74778	0.550135	4.99474	5.89149e-07	1.04122e-05	up-regulated
ENSG00000012223	LTF	lactotransferrin [Source:HGNC Symbol;Acc:HGNC:6720]	4057	11931.1	6.36639	0.878562	7.24638	4.28045e-13	1.96806e-11	up-regulated
ENSG00000013573	DDX11	DEAD/H-box helicase 11 [Source:HGNC Symbol;Acc:HGNC:2736]	1663	869.507	-2.11975	0.443141	-4.78347	1.72291e-06	2.72534e-05	down-regulated
ENSG00000013619	MAMLD1	mastermind like domain containing 1 [Source:HGNC Symbol;Acc:HGNC:2568]	10046	402.125	2.03975	0.366485	5.5657	2.61109e-08	6.25226e-07	up-regulated
ENSG00000015592	STMN4	stathmin 4 [Source:HGNC Symbol;Acc:HGNC:16078]	81551	238.24	5.06862	0.561091	9.03352	1.66241e-19	1.48846e-17	up-regulated
ENSG00000016391	CHDH	choline dehydrogenase [Source:HGNC Symbol;Acc:HGNC:24288]	55349	968.025	2.98404	0.243641	12.2477	1.72778e-34	4.72e-32	up-regulated
ENSG00000018625	ATP1A2	ATPase Na+/K+ transporting subunit alpha 2 [Source:HGNC Symbol;Acc:HGNC:800]	477	14406.9	3.64364	0.877443	4.15257	3.28767e-05	0.000362535	up-regulated
ENSG00000019102	VSIG2	V-set and immunoglobulin domain containing 2 [Source:HGNC Symbol;Acc:HGNC:17149]	23584	76.7943	-3.24473	0.6318	-5.13569	2.81106e-07	5.33774e-06	down-regulated
ENSG00000019549	SNAI2	snail family transcriptional repressor 2 [Source:HGNC Symbol;Acc:HGNC:11094]	6591	1210.3	-2.11823	0.296795	-7.13702	9.53738e-13	4.16021e-11	down-regulated
ENSG00000020577	SAMD4A	sterile alpha motif domain containing 4A [Source:HGNC Symbol;Acc:HGNC:23023]	23034	5651.71	3.4399	0.455267	7.5558	4.16303e-14	2.16698e-12	up-regulated
ENSG00000021300	PLEKHB1	pleckstrin homology domain containing B1 [Source:HGNC Symbol;Acc:HGNC:19079]	58473	11445.9	5.93495	0.508766	11.6654	1.91567e-31	4.21739e-29	up-regulated
ENSG00000021645	NRXN3	neurexin 3 [Source:HGNC Symbol;Acc:HGNC:8010]	9369	613.163	2.07908	0.470963	4.41453	1.01231e-05	0.000130014	up-regulated
ENSG00000022267	FHL1	four and a half LIM domains 1 [Source:HGNC Symbol;Acc:HGNC:3702]	2273	6123.06	2.46717	0.38055	6.48317	8.9815e-11	3.13472e-09	up-regulated
ENSG00000025423	HSD17B6	hydroxysteroid 17-beta dehydrogenase 6 [Source:HGNC Symbol;Acc:HGNC:23316]	8630	163.337	2.34399	0.462524	5.06783	4.02371e-07	7.3747e-06	up-regulated
ENSG00000026559	KCNG1	potassium voltage-gated channel modifier subfamily G member 1 [Source:HGNC Symbol;Acc:HGNC:6248]	3755	1188.47	2.76641	0.680996	4.06231	4.85904e-05	0.000503473	up-regulated
ENSG00000034677	RNF19A	ring finger protein 19A, RBR E3 ubiquitin protein ligase [Source:HGNC Symbol;Acc:HGNC:13432]	25897	3565.38	2.01187	0.284175	7.07969	1.44482e-12	6.20114e-11	up-regulated
ENSG00000036530	CYP46A1	cytochrome P450 family 46 subfamily A member 1 [Source:HGNC Symbol;Acc:HGNC:2641]	10858	500.294	3.35613	0.465761	7.20569	5.77516e-13	2.58852e-11	up-regulated
ENSG00000036672	USP2	ubiquitin specific peptidase 2 [Source:HGNC Symbol;Acc:HGNC:12618]	9099	1027.01	2.70372	0.505754	5.34592	8.99574e-08	1.91075e-06	up-regulated
ENSG00000039139	DNAH5	dynein axonemal heavy chain 5 [Source:HGNC Symbol;Acc:HGNC:2950]	1767	581.598	5.61758	0.486382	11.5497	7.40682e-31	1.56615e-28	up-regulated
ENSG00000039537	C6	complement C6 [Source:HGNC Symbol;Acc:HGNC:1339]	729	209.056	3.90849	0.78744	4.96355	6.92177e-07	1.20155e-05	up-regulated
ENSG00000040731	CDH10	cadherin 10 [Source:HGNC Symbol;Acc:HGNC:1749]	1008	186.235	5.23235	0.38988	13.4204	4.59232e-41	1.97554e-38	up-regulated
ENSG00000041515	MYO16	myosin XVI [Source:HGNC Symbol;Acc:HGNC:29822]	23026	74.9589	2.83092	0.471699	6.00154	1.95453e-09	5.73279e-08	up-regulated
ENSG00000042781	USH2A	usherin [Source:HGNC Symbol;Acc:HGNC:12601]	7399	11.5131	2.13412	0.539832	3.95331	7.70788e-05	0.000742727	up-regulated
ENSG00000046651	OFD1	OFD1 centriole and centriolar satellite protein [Source:HGNC Symbol;Acc:HGNC:2567]	8481	3849.38	2.03646	0.256085	7.95228	1.83104e-15	1.10709e-13	up-regulated
ENSG00000046653	GPM6B	glycoprotein M6B [Source:HGNC Symbol;Acc:HGNC:4461]	2824	15318	5.69714	0.435917	13.0693	4.93079e-39	1.92229e-36	up-regulated
ENSG00000046889	PREX2	phosphatidylinositol-3,4,5-trisphosphate dependent Rac exchange factor 2 [Source:HGNC Symbol;Acc:HGNC:22950]	80243	1530.96	3.71515	0.432423	8.59146	8.58679e-18	6.65361e-16	up-regulated
ENSG00000047457	CP	ceruloplasmin [Source:HGNC Symbol;Acc:HGNC:2295]	1356	6181	3.19382	0.613321	5.20742	1.91488e-07	3.77389e-06	up-regulated
ENSG00000047849	MAP4	microtubule associated protein 4 [Source:HGNC Symbol;Acc:HGNC:6862]	4134	27367.1	2.51792	0.275049	9.15443	5.46442e-20	5.04967e-18	up-regulated
ENSG00000048540	LMO3	LIM domain only 3 [Source:HGNC Symbol;Acc:HGNC:6643]	55885	1598.21	4.48729	0.564474	7.9495	1.87267e-15	1.13043e-13	up-regulated
ENSG00000050030	NEXMIF	neurite extension and migration factor [Source:HGNC Symbol;Acc:HGNC:29433]	340533	153.211	2.17334	0.510551	4.25686	2.0732e-05	0.000242322	up-regulated
ENSG00000050438	SLC4A8	solute carrier family 4 member 8 [Source:HGNC Symbol;Acc:HGNC:11034]	9498	820.754	2.27732	0.438131	5.19781	2.0165e-07	3.95542e-06	up-regulated
ENSG00000054179	ENTPD2	ectonucleoside triphosphate diphosphohydrolase 2 [Source:HGNC Symbol;Acc:HGNC:3364]	954	1795.52	4.78261	0.652257	7.3324	2.26073e-13	1.08197e-11	up-regulated
ENSG00000054965	FAM168A	family with sequence similarity 168 member A [Source:HGNC Symbol;Acc:HGNC:28999]	23201	5758.89	2.01384	0.279781	7.19791	6.1143e-13	2.73071e-11	up-regulated
ENSG00000055118	KCNH2	potassium voltage-gated channel subfamily H member 2 [Source:HGNC Symbol;Acc:HGNC:6251]	3757	778.317	3.69826	0.469661	7.87431	3.42619e-15	2.02573e-13	up-regulated
ENSG00000055732	MCOLN3	mucolipin TRP cation channel 3 [Source:HGNC Symbol;Acc:HGNC:13358]	55283	281.972	-2.14758	0.531441	-4.04105	5.32131e-05	0.000543135	down-regulated
ENSG00000055813	CCDC85A	coiled-coil domain containing 85A [Source:HGNC Symbol;Acc:HGNC:29400]	114800	505.266	3.37294	0.499725	6.74959	1.48262e-11	5.71028e-10	up-regulated
ENSG00000056736	IL17RB	interleukin 17 receptor B [Source:HGNC Symbol;Acc:HGNC:18015]	55540	759.922	3.45953	0.221975	15.5852	9.17645e-55	9.03783e-52	up-regulated
ENSG00000056998	GYG2	glycogenin 2 [Source:HGNC Symbol;Acc:HGNC:4700]	8908	1351.25	3.60786	0.372445	9.68696	3.42558e-22	3.86162e-20	up-regulated
ENSG00000057593	F7	coagulation factor VII [Source:HGNC Symbol;Acc:HGNC:3544]	2155	21.1414	-2.77394	0.709516	-3.90961	9.2444e-05	0.000868208	down-regulated
ENSG00000058866	DGKG	diacylglycerol kinase gamma [Source:HGNC Symbol;Acc:HGNC:2853]	1608	808.647	3.20074	0.453691	7.05489	1.72739e-12	7.35485e-11	up-regulated
ENSG00000061455	PRDM6	PR/SET domain 6 [Source:HGNC Symbol;Acc:HGNC:9350]	93166	227.598	-3.93842	0.70033	-5.62366	1.86951e-08	4.60621e-07	down-regulated
ENSG00000062096	ARSF	arylsulfatase F [Source:HGNC Symbol;Acc:HGNC:721]	416	32.5042	5.35967	0.543872	9.85465	6.54456e-23	7.77577e-21	up-regulated
ENSG00000064042	LIMCH1	LIM and calponin homology domains 1 [Source:HGNC Symbol;Acc:HGNC:29191]	22998	3371.66	2.50174	0.39773	6.29004	3.17382e-10	1.03741e-08	up-regulated
ENSG00000064199	SPA17	sperm autoantigenic protein 17 [Source:HGNC Symbol;Acc:HGNC:11210]	53340	534.588	2.51284	0.223277	11.2544	2.20391e-29	4.34124e-27	up-regulated
ENSG00000064393	HIPK2	homeodomain interacting protein kinase 2 [Source:HGNC Symbol;Acc:HGNC:14402]	28996	7636.2	2.28095	0.381193	5.98372	2.181e-09	6.37703e-08	up-regulated
ENSG00000064787	BCAS1	brain enriched myelin associated protein 1 [Source:HGNC Symbol;Acc:HGNC:974]	8537	1817.99	6.67897	0.512141	13.0413	7.12632e-39	2.6671e-36	up-regulated
ENSG00000064886	CHI3L2	chitinase 3 like 2 [Source:HGNC Symbol;Acc:HGNC:1933]	1117	3523.3	5.72179	0.701491	8.15661	3.44547e-16	2.27827e-14	up-regulated
ENSG00000065320	NTN1	netrin 1 [Source:HGNC Symbol;Acc:HGNC:8029]	9423	5876.35	4.21949	0.586393	7.19567	6.21562e-13	2.77265e-11	up-regulated
ENSG00000065609	SNAP91	synaptosome associated protein 91 [Source:HGNC Symbol;Acc:HGNC:14986]	9892	493.049	2.66925	0.507436	5.26027	1.43842e-07	2.91553e-06	up-regulated
ENSG00000066032	CTNNA2	catenin alpha 2 [Source:HGNC Symbol;Acc:HGNC:2510]	1496	2948.53	6.63139	0.568168	11.6715	1.78193e-31	3.96966e-29	up-regulated
ENSG00000066185	ZMYND12	zinc finger MYND-type containing 12 [Source:HGNC Symbol;Acc:HGNC:21192]	84217	158.717	2.56895	0.423662	6.06368	1.33045e-09	4.0156e-08	up-regulated
ENSG00000066248	NGEF	neuronal guanine nucleotide exchange factor [Source:HGNC Symbol;Acc:HGNC:7807]	25791	779.604	2.73209	0.493423	5.53701	3.07674e-08	7.25584e-07	up-regulated
ENSG00000067840	PDZD4	PDZ domain containing 4 [Source:HGNC Symbol;Acc:HGNC:21167]	57595	2666.08	2.11798	0.495563	4.27389	1.92088e-05	0.000226749	up-regulated
ENSG00000068976	PYGM	glycogen phosphorylase, muscle associated [Source:HGNC Symbol;Acc:HGNC:9726]	5837	542.819	3.73148	0.607628	6.14106	8.19749e-10	2.54817e-08	up-regulated
ENSG00000069535	MAOB	monoamine oxidase B [Source:HGNC Symbol;Acc:HGNC:6834]	4129	12280.3	5.65865	0.476782	11.8684	1.72717e-32	4.09121e-30	up-regulated
ENSG00000070031	SCT	secretin [Source:HGNC Symbol;Acc:HGNC:10607]	6343	117.708	-3.10687	0.706375	-4.39834	1.09084e-05	0.000138439	down-regulated
ENSG00000073464	CLCN4	chloride voltage-gated channel 4 [Source:HGNC Symbol;Acc:HGNC:2022]	1183	555.338	3.0757	0.386117	7.96572	1.6426e-15	1.00451e-13	up-regulated
ENSG00000075043	KCNQ2	potassium voltage-gated channel subfamily Q member 2 [Source:HGNC Symbol;Acc:HGNC:6296]	3785	770.699	4.04906	0.925548	4.37478	1.21557e-05	0.000152001	up-regulated
ENSG00000075290	WNT8B	Wnt family member 8B [Source:HGNC Symbol;Acc:HGNC:12789]	7479	23.0361	-3.51567	0.768866	-4.57254	4.81851e-06	6.77705e-05	down-regulated
ENSG00000076344	RGS11	regulator of G protein signaling 11 [Source:HGNC Symbol;Acc:HGNC:9993]	8786	795.319	2.30431	0.439458	5.24353	1.57534e-07	3.16641e-06	up-regulated
ENSG00000077279	DCX	doublecortin [Source:HGNC Symbol;Acc:HGNC:2714]	1641	49.5031	2.95025	0.656893	4.49122	7.08158e-06	9.54738e-05	up-regulated
ENSG00000077327	SPAG6	sperm associated antigen 6 [Source:HGNC Symbol;Acc:HGNC:11215]	9576	252.062	4.87614	0.530931	9.18412	4.14904e-20	3.87237e-18	up-regulated
ENSG00000077522	ACTN2	actinin alpha 2 [Source:HGNC Symbol;Acc:HGNC:164]	88	117.483	2.59177	0.512744	5.05471	4.31045e-07	7.85409e-06	up-regulated
ENSG00000077942	FBLN1	fibulin 1 [Source:HGNC Symbol;Acc:HGNC:3600]	2192	13522.2	-2.00425	0.407653	-4.91655	8.80816e-07	1.49589e-05	down-regulated
ENSG00000078114	NEBL	nebulette [Source:HGNC Symbol;Acc:HGNC:16932]	10529	5327.22	3.18504	0.42011	7.58143	3.41755e-14	1.80148e-12	up-regulated
ENSG00000078295	ADCY2	adenylate cyclase 2 [Source:HGNC Symbol;Acc:HGNC:233]	108	2387.51	4.07234	0.584431	6.96804	3.21392e-12	1.33353e-10	up-regulated
ENSG00000078549	ADCYAP1R1	ADCYAP receptor type I [Source:HGNC Symbol;Acc:HGNC:242]	117	4869.39	7.27755	0.461818	15.7585	6.00652e-56	6.24445e-53	up-regulated
ENSG00000078725	BRINP1	BMP/retinoic acid inducible neural specific 1 [Source:HGNC Symbol;Acc:HGNC:2687]	1620	799.733	2.90967	0.718413	4.05014	5.11879e-05	0.000525865	up-regulated
ENSG00000078900	TP73	tumor protein p73 [Source:HGNC Symbol;Acc:HGNC:12003]	7161	1596.93	-2.66192	0.653942	-4.07058	4.68958e-05	0.000488892	down-regulated
ENSG00000080493	SLC4A4	solute carrier family 4 member 4 [Source:HGNC Symbol;Acc:HGNC:11030]	8671	2839.53	3.65055	0.576309	6.33436	2.38328e-10	7.94271e-09	up-regulated
ENSG00000080572	DNAAF6	dynein axonemal assembly factor 6 [Source:HGNC Symbol;Acc:HGNC:28570]	139212	14.4118	5.22701	0.912032	5.73117	9.97426e-09	2.58516e-07	up-regulated
ENSG00000080709	KCNN2	potassium calcium-activated channel subfamily N member 2 [Source:HGNC Symbol;Acc:HGNC:6291]	3781	352.452	4.25679	0.409908	10.3847	2.90982e-25	4.22104e-23	up-regulated
ENSG00000080854	IGSF9B	immunoglobulin superfamily member 9B [Source:HGNC Symbol;Acc:HGNC:32326]	22997	865.371	2.70025	0.298223	9.05449	1.37206e-19	1.24035e-17	up-regulated
ENSG00000081818	PCDHB4	protocadherin beta 4 [Source:HGNC Symbol;Acc:HGNC:8689]	56131	582.268	2.96386	0.614131	4.8261	1.39232e-06	2.26561e-05	up-regulated
ENSG00000081842	PCDHA6	protocadherin alpha 6 [Source:HGNC Symbol;Acc:HGNC:8672]	56142	1001.74	2.49895	0.54208	4.60993	4.02811e-06	5.80277e-05	up-regulated
ENSG00000081853	PCDHGA2	protocadherin gamma subfamily A, 2 [Source:HGNC Symbol;Acc:HGNC:8700]	56113	16239.9	2.23653	0.423294	5.28363	1.26647e-07	2.60734e-06	up-regulated
ENSG00000081913	PHLPP1	PH domain and leucine rich repeat protein phosphatase 1 [Source:HGNC Symbol;Acc:HGNC:20610]	23239	1614.92	2.22544	0.314773	7.07	1.54938e-12	6.64228e-11	up-regulated
ENSG00000081985	IL12RB2	interleukin 12 receptor subunit beta 2 [Source:HGNC Symbol;Acc:HGNC:5972]	3595	142.628	-2.90414	0.6689	-4.34166	1.41408e-05	0.000173178	down-regulated
ENSG00000084710	EFR3B	EFR3 homolog B [Source:HGNC Symbol;Acc:HGNC:29155]	22979	715.652	3.04553	0.416629	7.30992	2.67298e-13	1.26471e-11	up-regulated
ENSG00000087085	ACHE	acetylcholinesterase (Cartwright blood group) [Source:HGNC Symbol;Acc:HGNC:108]	43	424.186	2.07123	0.528661	3.91788	8.93328e-05	0.000841946	up-regulated
ENSG00000087250	MT3	metallothionein 3 [Source:HGNC Symbol;Acc:HGNC:7408]	4504	2525.83	5.48254	0.491767	11.1486	7.27047e-29	1.37427e-26	up-regulated
ENSG00000087258	GNAO1	G protein subunit alpha o1 [Source:HGNC Symbol;Acc:HGNC:4389]	2775	2568.52	4.35991	0.427568	10.197	2.04489e-24	2.78299e-22	up-regulated
ENSG00000087495	PHACTR3	phosphatase and actin regulator 3 [Source:HGNC Symbol;Acc:HGNC:15833]	116154	567.685	5.02145	0.384811	13.0491	6.42708e-39	2.42969e-36	up-regulated
ENSG00000088305	DNMT3B	DNA methyltransferase 3 beta [Source:HGNC Symbol;Acc:HGNC:2979]	1789	261.216	-2.48916	0.555969	-4.47715	7.56465e-06	0.000100968	down-regulated
ENSG00000088538	DOCK3	dedicator of cytokinesis 3 [Source:HGNC Symbol;Acc:HGNC:2989]	1795	552.713	2.25901	0.520899	4.33675	1.44603e-05	0.000176399	up-regulated
ENSG00000088826	SMOX	spermine oxidase [Source:HGNC Symbol;Acc:HGNC:15862]	54498	2276.98	3.43585	0.234818	14.6319	1.75688e-48	1.31506e-45	up-regulated
ENSG00000088882	CPXM1	carboxypeptidase X, M14 family member 1 [Source:HGNC Symbol;Acc:HGNC:15771]	56265	3142.52	-3.1375	0.45268	-6.93095	4.18034e-12	1.708e-10	down-regulated
ENSG00000089101	CFAP61	cilia and flagella associated protein 61 [Source:HGNC Symbol;Acc:HGNC:15872]	26074	232.487	3.08592	0.609494	5.06309	4.12513e-07	7.54949e-06	up-regulated
ENSG00000089169	RPH3A	rabphilin 3A [Source:HGNC Symbol;Acc:HGNC:17056]	22895	78.1209	3.09355	0.697904	4.43262	9.3093e-06	0.000120724	up-regulated
ENSG00000091129	NRCAM	neuronal cell adhesion molecule [Source:HGNC Symbol;Acc:HGNC:7994]	4897	6765.43	3.98701	0.433607	9.19498	3.75064e-20	3.51808e-18	up-regulated
ENSG00000091136	LAMB1	laminin subunit beta 1 [Source:HGNC Symbol;Acc:HGNC:6486]	3912	15367.6	-2.16044	0.329257	-6.56156	5.32469e-11	1.91249e-09	down-regulated
ENSG00000091513	TF	transferrin [Source:HGNC Symbol;Acc:HGNC:11740]	7018	2047.94	5.20586	0.539409	9.65106	4.86513e-22	5.4353e-20	up-regulated
ENSG00000091592	NLRP1	NLR family pyrin domain containing 1 [Source:HGNC Symbol;Acc:HGNC:14374]	22861	7725.66	2.50533	0.362	6.9208	4.49101e-12	1.83094e-10	up-regulated
ENSG00000092051	JPH4	junctophilin 4 [Source:HGNC Symbol;Acc:HGNC:20156]	84502	737.111	2.95614	0.62925	4.69788	2.62874e-06	3.98959e-05	up-regulated
ENSG00000092054	MYH7	myosin heavy chain 7 [Source:HGNC Symbol;Acc:HGNC:7577]	4625	216.519	5.28258	0.666224	7.92913	2.20682e-15	1.3236e-13	up-regulated
ENSG00000092096	SLC22A17	solute carrier family 22 member 17 [Source:HGNC Symbol;Acc:HGNC:23095]	51310	5681.37	2.25653	0.395073	5.71169	1.11861e-08	2.87337e-07	up-regulated
ENSG00000092445	TYRO3	TYRO3 protein tyrosine kinase [Source:HGNC Symbol;Acc:HGNC:12446]	7301	1787.25	3.50944	0.251501	13.954	2.97533e-44	1.66201e-41	up-regulated
ENSG00000092964	DPYSL2	dihydropyrimidinase like 2 [Source:HGNC Symbol;Acc:HGNC:3014]	1808	13610.7	2.96165	0.473336	6.25697	3.9252e-10	1.2719e-08	up-regulated
ENSG00000095637	SORBS1	sorbin and SH3 domain containing 1 [Source:HGNC Symbol;Acc:HGNC:14565]	10580	10360.6	4.72187	0.411686	11.4696	1.87546e-30	3.8995e-28	up-regulated
ENSG00000099194	SCD	stearoyl-CoA desaturase [Source:HGNC Symbol;Acc:HGNC:10571]	6319	16265.4	2.87903	0.526966	5.46341	4.67078e-08	1.05053e-06	up-regulated
ENSG00000099256	PRTFDC1	phosphoribosyl transferase domain containing 1 [Source:HGNC Symbol;Acc:HGNC:23333]	56952	943.824	2.05513	0.274123	7.4971	6.52428e-14	3.31313e-12	up-regulated
ENSG00000099957	P2RX6	purinergic receptor P2X 6 [Source:HGNC Symbol;Acc:HGNC:8538]	9127	237.129	3.43852	0.411738	8.35123	6.75584e-17	4.78871e-15	up-regulated
ENSG00000100003	SEC14L2	SEC14 like lipid binding 2 [Source:HGNC Symbol;Acc:HGNC:10699]	23541	3868.58	2.03261	0.439856	4.62109	3.81724e-06	5.53736e-05	up-regulated
ENSG00000100146	SOX10	SRY-box transcription factor 10 [Source:HGNC Symbol;Acc:HGNC:11190]	6663	1238.91	4.95497	0.759478	6.52418	6.83758e-11	2.41418e-09	up-regulated
ENSG00000100167	SEPTIN3	septin 3 [Source:HGNC Symbol;Acc:HGNC:10750]	55964	2527.89	4.1126	0.410274	10.024	1.19525e-23	1.51126e-21	up-regulated
ENSG00000100427	MLC1	modulator of VRAC current 1 [Source:HGNC Symbol;Acc:HGNC:17082]	23209	12152.6	7.10107	0.598706	11.8607	1.89401e-32	4.45819e-30	up-regulated
ENSG00000100505	TRIM9	tripartite motif containing 9 [Source:HGNC Symbol;Acc:HGNC:16288]	114088	2273.1	4.39615	0.377409	11.6482	2.34272e-31	5.06813e-29	up-regulated
ENSG00000100583	SAMD15	sterile alpha motif domain containing 15 [Source:HGNC Symbol;Acc:HGNC:18631]	161394	111.383	2.56103	0.303943	8.42601	3.57654e-17	2.57911e-15	up-regulated
ENSG00000100605	ITPK1	inositol-tetrakisphosphate 1-kinase [Source:HGNC Symbol;Acc:HGNC:6177]	3705	4995.2	2.07678	0.321186	6.46598	1.00643e-10	3.478e-09	up-regulated
ENSG00000100625	SIX4	SIX homeobox 4 [Source:HGNC Symbol;Acc:HGNC:10890]	51804	391.96	-2.1498	0.38838	-5.53531	3.10673e-08	7.31733e-07	down-regulated
ENSG00000100626	GALNT16	polypeptide N-acetylgalactosaminyltransferase 16 [Source:HGNC Symbol;Acc:HGNC:23233]	57452	804.174	2.805	0.317587	8.83224	1.02597e-18	8.59015e-17	up-regulated
ENSG00000100678	SLC8A3	solute carrier family 8 member A3 [Source:HGNC Symbol;Acc:HGNC:11070]	6547	469.981	4.13771	0.463557	8.92601	4.41668e-19	3.84129e-17	up-regulated
ENSG00000100884	CPNE6	copine 6 [Source:HGNC Symbol;Acc:HGNC:2319]	9362	509.266	4.81001	0.728235	6.60503	3.97441e-11	1.4526e-09	up-regulated
ENSG00000100987	VSX1	visual system homeobox 1 [Source:HGNC Symbol;Acc:HGNC:12723]	30813	96.8489	4.72904	0.611802	7.72968	1.07816e-14	5.98681e-13	up-regulated
ENSG00000101115	SALL4	spalt like transcription factor 4 [Source:HGNC Symbol;Acc:HGNC:15924]	57167	144.216	-2.40872	0.453342	-5.31326	1.07682e-07	2.25397e-06	down-regulated
ENSG00000101134	DOK5	docking protein 5 [Source:HGNC Symbol;Acc:HGNC:16173]	55816	366.76	3.32968	0.389532	8.5479	1.25353e-17	9.57438e-16	up-regulated
ENSG00000101162	TUBB1	tubulin beta 1 class VI [Source:HGNC Symbol;Acc:HGNC:16257]	81027	84.6369	2.21587	0.277495	7.98526	1.40229e-15	8.67474e-14	up-regulated
ENSG00000101198	NKAIN4	sodium/potassium transporting ATPase interacting 4 [Source:HGNC Symbol;Acc:HGNC:16191]	128414	507.028	2.75762	0.592136	4.65708	3.20721e-06	4.75336e-05	up-regulated
ENSG00000101203	COL20A1	collagen type XX alpha 1 chain [Source:HGNC Symbol;Acc:HGNC:14670]	57642	366.316	5.4297	0.902535	6.01606	1.78716e-09	5.28744e-08	up-regulated
ENSG00000101222	SPEF1	sperm flagellar 1 [Source:HGNC Symbol;Acc:HGNC:15874]	25876	339.72	5.42025	0.381562	14.2054	8.47812e-46	5.378e-43	up-regulated
ENSG00000101298	SNPH	syntaphilin [Source:HGNC Symbol;Acc:HGNC:15931]	9751	972.688	3.21197	0.302711	10.6107	2.65884e-26	4.09505e-24	up-regulated
ENSG00000101400	SNTA1	syntrophin alpha 1 [Source:HGNC Symbol;Acc:HGNC:11167]	6640	2128.15	2.63973	0.375531	7.02932	2.07549e-12	8.75731e-11	up-regulated
ENSG00000101463	SYNDIG1	synapse differentiation inducing 1 [Source:HGNC Symbol;Acc:HGNC:15885]	79953	732.356	2.49475	0.509563	4.89586	9.7878e-07	1.63901e-05	up-regulated
ENSG00000101542	CDH20	cadherin 20 [Source:HGNC Symbol;Acc:HGNC:1760]	28316	949.646	3.52417	0.71044	4.96055	7.0294e-07	1.2191e-05	up-regulated
ENSG00000101605	MYOM1	myomesin 1 [Source:HGNC Symbol;Acc:HGNC:7613]	8736	816.02	3.35177	0.443007	7.56595	3.85045e-14	2.01267e-12	up-regulated
ENSG00000101638	ST8SIA5	ST8 alpha-N-acetyl-neuraminide alpha-2,8-sialyltransferase 5 [Source:HGNC Symbol;Acc:HGNC:17827]	29906	94.2904	2.64611	0.617692	4.28386	1.83677e-05	0.000217748	up-regulated
ENSG00000101746	NOL4	nucleolar protein 4 [Source:HGNC Symbol;Acc:HGNC:7870]	8715	142.642	3.39356	0.548388	6.18825	6.08346e-10	1.91488e-08	up-regulated
ENSG00000101842	VSIG1	V-set and immunoglobulin domain containing 1 [Source:HGNC Symbol;Acc:HGNC:28675]	340547	70.0988	-3.072	0.637694	-4.81736	1.45467e-06	2.35478e-05	down-regulated
ENSG00000101958	GLRA2	glycine receptor alpha 2 [Source:HGNC Symbol;Acc:HGNC:4327]	2742	69.9248	4.08304	0.857287	4.76275	1.90974e-06	2.98057e-05	up-regulated
ENSG00000101977	MCF2	MCF.2 cell line derived transforming sequence [Source:HGNC Symbol;Acc:HGNC:6940]	4168	136.272	2.79621	0.388126	7.20439	5.83061e-13	2.61025e-11	up-regulated
ENSG00000102057	KCND1	potassium voltage-gated channel subfamily D member 1 [Source:HGNC Symbol;Acc:HGNC:6237]	3750	519.616	2.43261	0.321218	7.57306	3.64522e-14	1.91073e-12	up-regulated
ENSG00000102174	PHEX	phosphate regulating endopeptidase homolog X-linked [Source:HGNC Symbol;Acc:HGNC:8918]	5251	304.858	4.6614	0.411564	11.3261	9.74708e-30	1.95077e-27	up-regulated
ENSG00000102230	PCYT1B	phosphate cytidylyltransferase 1B, choline [Source:HGNC Symbol;Acc:HGNC:8755]	9468	418.124	3.85119	0.485458	7.9331	2.13736e-15	1.28606e-13	up-regulated
ENSG00000102271	KLHL4	kelch like family member 4 [Source:HGNC Symbol;Acc:HGNC:6355]	56062	225.919	2.86455	0.728276	3.93333	8.37767e-05	0.000797818	up-regulated
ENSG00000102362	SYTL4	synaptotagmin like 4 [Source:HGNC Symbol;Acc:HGNC:15588]	94121	1704.31	2.37543	0.403673	5.88453	3.99198e-09	1.11081e-07	up-regulated
ENSG00000102383	ZDHHC15	zinc finger DHHC-type palmitoyltransferase 15 [Source:HGNC Symbol;Acc:HGNC:20342]	158866	553.463	2.15298	0.467226	4.60801	4.06545e-06	5.84531e-05	up-regulated
ENSG00000102385	DRP2	dystrophin related protein 2 [Source:HGNC Symbol;Acc:HGNC:3032]	1821	354.195	3.29235	0.64775	5.08276	3.71994e-07	6.86565e-06	up-regulated
ENSG00000102452	NALCN	sodium leak channel, non-selective [Source:HGNC Symbol;Acc:HGNC:19082]	259232	869.192	3.056	0.522566	5.84806	4.97332e-09	1.36161e-07	up-regulated
ENSG00000102547	CAB39L	calcium binding protein 39 like [Source:HGNC Symbol;Acc:HGNC:20290]	81617	2034.74	3.26989	0.239739	13.6394	2.33513e-42	1.13499e-39	up-regulated
ENSG00000102683	SGCG	sarcoglycan gamma [Source:HGNC Symbol;Acc:HGNC:10809]	6445	62.1534	-2.78453	0.618189	-4.50434	6.65801e-06	9.01855e-05	down-regulated
ENSG00000102802	MEDAG	mesenteric estrogen dependent adipogenesis [Source:HGNC Symbol;Acc:HGNC:25926]	84935	491.733	-3.31306	0.837314	-3.95678	7.59677e-05	0.0007341	down-regulated
ENSG00000103021	CCDC113	coiled-coil domain containing 113 [Source:HGNC Symbol;Acc:HGNC:25002]	29070	694.793	3.06322	0.496776	6.16619	6.99529e-10	2.19452e-08	up-regulated
ENSG00000103023	PRSS54	serine protease 54 [Source:HGNC Symbol;Acc:HGNC:26336]	221191	125.049	3.13905	0.463802	6.76809	1.30494e-11	5.07678e-10	up-regulated
ENSG00000103034	NDRG4	NDRG family member 4 [Source:HGNC Symbol;Acc:HGNC:14466]	65009	3424.03	3.13885	0.242482	12.9447	2.51793e-38	8.8902e-36	up-regulated
ENSG00000103089	FA2H	fatty acid 2-hydroxylase [Source:HGNC Symbol;Acc:HGNC:21197]	79152	83.8159	2.29061	0.526399	4.35147	1.35226e-05	0.000166479	up-regulated
ENSG00000103257	SLC7A5	solute carrier family 7 member 5 [Source:HGNC Symbol;Acc:HGNC:11063]	8140	2791.64	2.02618	0.383785	5.27946	1.29568e-07	2.65709e-06	up-regulated
ENSG00000103260	METRN	meteorin, glial cell differentiation regulator [Source:HGNC Symbol;Acc:HGNC:14151]	79006	5394.31	4.44526	0.452254	9.82913	8.43433e-23	9.98934e-21	up-regulated
ENSG00000103449	SALL1	spalt like transcription factor 1 [Source:HGNC Symbol;Acc:HGNC:10524]	6299	673.351	3.97948	0.548183	7.2594	3.88816e-13	1.80768e-11	up-regulated
ENSG00000103647	CORO2B	coronin 2B [Source:HGNC Symbol;Acc:HGNC:2256]	10391	635.656	2.63043	0.525255	5.00791	5.50236e-07	9.79693e-06	up-regulated
ENSG00000103710	RASL12	RAS like family 12 [Source:HGNC Symbol;Acc:HGNC:30289]	51285	925.864	3.74616	0.532242	7.03845	1.94389e-12	8.22057e-11	up-regulated
ENSG00000103742	IGDCC4	immunoglobulin superfamily DCC subclass member 4 [Source:HGNC Symbol;Acc:HGNC:13770]	57722	525.268	2.39072	0.500403	4.77759	1.77411e-06	2.7978e-05	up-regulated
ENSG00000104112	SCG3	secretogranin III [Source:HGNC Symbol;Acc:HGNC:13707]	29106	3071.63	5.66705	0.521634	10.864	1.7101e-27	2.96306e-25	up-regulated
ENSG00000104313	EYA1	EYA transcriptional coactivator and phosphatase 1 [Source:HGNC Symbol;Acc:HGNC:3519]	2138	889.023	-3.4373	0.806084	-4.2642	2.00616e-05	0.00023559	down-regulated
ENSG00000104332	SFRP1	secreted frizzled related protein 1 [Source:HGNC Symbol;Acc:HGNC:10776]	6422	3876.3	-4.00616	0.718967	-5.5721	2.51681e-08	6.0575e-07	down-regulated
ENSG00000104450	SPAG1	sperm associated antigen 1 [Source:HGNC Symbol;Acc:HGNC:11212]	6674	971.814	2.6889	0.276228	9.73438	2.15119e-22	2.45459e-20	up-regulated
ENSG00000104490	NCALD	neurocalcin delta [Source:HGNC Symbol;Acc:HGNC:7655]	83988	616.749	2.0081	0.343216	5.85084	4.891e-09	1.34005e-07	up-regulated
ENSG00000104722	NEFM	neurofilament medium chain [Source:HGNC Symbol;Acc:HGNC:7734]	4741	272.37	2.33207	0.559322	4.16946	3.05326e-05	0.000340195	up-regulated
ENSG00000104833	TUBB4A	tubulin beta 4A class IVa [Source:HGNC Symbol;Acc:HGNC:20774]	10382	1408.23	3.36866	0.540576	6.23161	4.61679e-10	1.48443e-08	up-regulated
ENSG00000104967	NOVA2	NOVA alternative splicing regulator 2 [Source:HGNC Symbol;Acc:HGNC:7887]	4858	563.815	2.85572	0.466338	6.12372	9.14182e-10	2.82295e-08	up-regulated
ENSG00000105270	CLIP3	CAP-Gly domain containing linker protein 3 [Source:HGNC Symbol;Acc:HGNC:24314]	25999	3878.78	3.10817	0.329142	9.44326	3.61365e-21	3.799e-19	up-regulated
ENSG00000105290	APLP1	amyloid beta precursor like protein 1 [Source:HGNC Symbol;Acc:HGNC:597]	333	1533.7	2.77277	0.56738	4.88697	1.02398e-06	1.70782e-05	up-regulated
ENSG00000105409	ATP1A3	ATPase Na+/K+ transporting subunit alpha 3 [Source:HGNC Symbol;Acc:HGNC:801]	478	733.434	3.3526	0.769254	4.35825	1.31109e-05	0.000161943	up-regulated
ENSG00000105479	ODAD1	outer dynein arm docking complex subunit 1 [Source:HGNC Symbol;Acc:HGNC:26560]	93233	227.144	2.76046	0.422131	6.53934	6.17899e-11	2.19199e-09	up-regulated
ENSG00000105519	CAPS	calcyphosine [Source:HGNC Symbol;Acc:HGNC:1487]	828	5311.86	4.039	0.276429	14.6114	2.37684e-48	1.74423e-45	up-regulated
ENSG00000105605	CACNG7	calcium voltage-gated channel auxiliary subunit gamma 7 [Source:HGNC Symbol;Acc:HGNC:13626]	59284	600.272	6.61242	0.507331	13.0338	7.86391e-39	2.91401e-36	up-regulated
ENSG00000105641	SLC5A5	solute carrier family 5 member 5 [Source:HGNC Symbol;Acc:HGNC:11040]	6528	71.2973	-4.53904	1.05791	-4.29056	1.7822e-05	0.000212152	down-regulated
ENSG00000105695	MAG	myelin associated glycoprotein [Source:HGNC Symbol;Acc:HGNC:6783]	4099	277.239	5.40279	0.868548	6.22049	4.95595e-10	1.58531e-08	up-regulated
ENSG00000105696	TMEM59L	transmembrane protein 59 like [Source:HGNC Symbol;Acc:HGNC:13237]	25789	2336.51	3.42917	0.615722	5.56935	2.55689e-08	6.14211e-07	up-regulated
ENSG00000105767	CADM4	cell adhesion molecule 4 [Source:HGNC Symbol;Acc:HGNC:30825]	199731	4157.97	2.59557	0.451144	5.75331	8.75134e-09	2.29201e-07	up-regulated
ENSG00000105854	PON2	paraoxonase 2 [Source:HGNC Symbol;Acc:HGNC:9205]	5445	4089.43	2.0273	0.189641	10.6902	1.13116e-26	1.81694e-24	up-regulated
ENSG00000105855	ITGB8	integrin subunit beta 8 [Source:HGNC Symbol;Acc:HGNC:6163]	3696	5330.35	2.29961	0.519686	4.42499	9.6445e-06	0.000124424	up-regulated
ENSG00000105926	PALS2	protein associated with LIN7 2, MAGUK p55 family member [Source:HGNC Symbol;Acc:HGNC:18167]	51678	946	2.14588	0.367852	5.83353	5.42658e-09	1.47491e-07	up-regulated
ENSG00000106003	LFNG	LFNG O-fucosylpeptide 3-beta-N-acetylglucosaminyltransferase [Source:HGNC Symbol;Acc:HGNC:6560]	3955	3098.58	2.09873	0.323432	6.48894	8.64402e-11	3.02065e-09	up-regulated
ENSG00000106078	COBL	cordon-bleu WH2 repeat protein [Source:HGNC Symbol;Acc:HGNC:22199]	23242	3888.34	4.84147	0.338002	14.3238	1.55401e-46	1.03858e-43	up-regulated
ENSG00000106278	PTPRZ1	protein tyrosine phosphatase receptor type Z1 [Source:HGNC Symbol;Acc:HGNC:9685]	5803	8368.96	3.06619	0.730771	4.19583	2.71876e-05	0.000307408	up-regulated
ENSG00000106333	PCOLCE	procollagen C-endopeptidase enhancer [Source:HGNC Symbol;Acc:HGNC:8738]	5118	3578.58	-2.30226	0.526494	-4.37282	1.22651e-05	0.000153035	down-regulated
ENSG00000106341	PPP1R17	protein phosphatase 1 regulatory subunit 17 [Source:HGNC Symbol;Acc:HGNC:16973]	10842	48.8654	5.08222	0.901863	5.63524	1.74814e-08	4.32425e-07	up-regulated
ENSG00000106511	MEOX2	mesenchyme homeobox 2 [Source:HGNC Symbol;Acc:HGNC:7014]	4223	68.0348	-4.83754	1.14774	-4.21482	2.49975e-05	0.000285231	down-regulated
ENSG00000106571	GLI3	GLI family zinc finger 3 [Source:HGNC Symbol;Acc:HGNC:4319]	2737	2979.64	-2.18024	0.5369	-4.0608	4.89046e-05	0.000506028	down-regulated
ENSG00000106633	GCK	glucokinase [Source:HGNC Symbol;Acc:HGNC:4195]	2645	211.386	2.67738	0.660597	4.05297	5.05721e-05	0.000520547	up-regulated
ENSG00000106665	CLIP2	CAP-Gly domain containing linker protein 2 [Source:HGNC Symbol;Acc:HGNC:2586]	7461	5939.43	3.01608	0.271253	11.1191	1.01324e-28	1.8773e-26	up-regulated
ENSG00000106689	LHX2	LIM homeobox 2 [Source:HGNC Symbol;Acc:HGNC:6594]	9355	220.033	3.84699	0.682636	5.63549	1.74565e-08	4.32095e-07	up-regulated
ENSG00000106701	FSD1L	fibronectin type III and SPRY domain containing 1 like [Source:HGNC Symbol;Acc:HGNC:13753]	83856	726.497	2.28552	0.279461	8.17832	2.87838e-16	1.93058e-14	up-regulated
ENSG00000106772	PRUNE2	prune homolog 2 with BCH domain [Source:HGNC Symbol;Acc:HGNC:25209]	158471	3582.86	4.64724	0.281989	16.4802	5.09375e-61	7.06069e-58	up-regulated
ENSG00000106823	ECM2	extracellular matrix protein 2 [Source:HGNC Symbol;Acc:HGNC:3154]	1842	2692.91	3.09682	0.49755	6.22414	4.84204e-10	1.55153e-08	up-regulated
ENSG00000106992	AK1	adenylate kinase 1 [Source:HGNC Symbol;Acc:HGNC:361]	203	3582.75	3.04029	0.410801	7.40089	1.35274e-13	6.64404e-12	up-regulated
ENSG00000107159	CA9	carbonic anhydrase 9 [Source:HGNC Symbol;Acc:HGNC:1383]	768	459.892	-3.38209	0.86194	-3.92381	8.71581e-05	0.000824982	down-regulated
ENSG00000107186	MPDZ	multiple PDZ domain crumbs cell polarity complex component [Source:HGNC Symbol;Acc:HGNC:7208]	8777	2898.41	2.26336	0.220066	10.2849	8.24008e-25	1.15937e-22	up-regulated
ENSG00000107249	GLIS3	GLIS family zinc finger 3 [Source:HGNC Symbol;Acc:HGNC:28510]	169792	1539.61	3.06089	0.424054	7.21817	5.26918e-13	2.37579e-11	up-regulated
ENSG00000107295	SH3GL2	SH3 domain containing GRB2 like 2, endophilin A1 [Source:HGNC Symbol;Acc:HGNC:10831]	6456	990.126	5.15573	0.3928	13.1256	2.35026e-39	9.56098e-37	up-regulated
ENSG00000107331	ABCA2	ATP binding cassette subfamily A member 2 [Source:HGNC Symbol;Acc:HGNC:32]	20	4627.59	2.23575	0.279603	7.99617	1.28351e-15	7.96628e-14	up-regulated
ENSG00000107518	ATRNL1	attractin like 1 [Source:HGNC Symbol;Acc:HGNC:29063]	26033	1140.95	3.49902	0.528641	6.6189	3.61886e-11	1.32784e-09	up-regulated
ENSG00000107742	SPOCK2	SPARC (osteonectin), cwcv and kazal like domains proteoglycan 2 [Source:HGNC Symbol;Acc:HGNC:13564]	9806	12475.7	3.75167	0.422591	8.8778	6.81967e-19	5.83462e-17	up-regulated
ENSG00000108001	EBF3	EBF transcription factor 3 [Source:HGNC Symbol;Acc:HGNC:19087]	253738	134.271	-2.93843	0.44748	-6.56662	5.14718e-11	1.85407e-09	down-regulated
ENSG00000108018	SORCS1	sortilin related VPS10 domain containing receptor 1 [Source:HGNC Symbol;Acc:HGNC:16697]	114815	565.526	2.9981	0.596663	5.02478	5.04004e-07	9.0426e-06	up-regulated
ENSG00000108176	DNAJC12	DnaJ heat shock protein family (Hsp40) member C12 [Source:HGNC Symbol;Acc:HGNC:28908]	56521	203.128	2.2929	0.448041	5.11763	3.09402e-07	5.82527e-06	up-regulated
ENSG00000108231	LGI1	leucine rich glioma inactivated 1 [Source:HGNC Symbol;Acc:HGNC:6572]	9211	186.678	3.54887	0.495036	7.16891	7.55971e-13	3.34038e-11	up-regulated
ENSG00000108370	RGS9	regulator of G protein signaling 9 [Source:HGNC Symbol;Acc:HGNC:10004]	8787	488.304	2.60372	0.384862	6.76535	1.32989e-11	5.16847e-10	up-regulated
ENSG00000108551	RASD1	ras related dexamethasone induced 1 [Source:HGNC Symbol;Acc:HGNC:15828]	51655	2576.29	3.2595	0.489773	6.65512	2.83067e-11	1.04788e-09	up-regulated
ENSG00000108576	SLC6A4	solute carrier family 6 member 4 [Source:HGNC Symbol;Acc:HGNC:11050]	6532	284.909	-3.84907	0.923843	-4.16637	3.09495e-05	0.000344429	down-regulated
ENSG00000108797	CNTNAP1	contactin associated protein 1 [Source:HGNC Symbol;Acc:HGNC:8011]	8506	1712.17	3.12168	0.197354	15.8177	2.35105e-56	2.58795e-53	up-regulated
ENSG00000108830	RND2	Rho family GTPase 2 [Source:HGNC Symbol;Acc:HGNC:18315]	8153	4917.35	4.01167	0.563779	7.11567	1.11372e-12	4.82432e-11	up-regulated
ENSG00000108852	MPP2	MAGUK p55 scaffold protein 2 [Source:HGNC Symbol;Acc:HGNC:7220]	4355	373.238	2.36073	0.417552	5.65373	1.57003e-08	3.90432e-07	up-regulated
ENSG00000109107	ALDOC	aldolase, fructose-bisphosphate C [Source:HGNC Symbol;Acc:HGNC:418]	230	4056.89	3.85717	0.324023	11.904	1.12815e-32	2.7417e-30	up-regulated
ENSG00000109189	USP46	ubiquitin specific peptidase 46 [Source:HGNC Symbol;Acc:HGNC:20075]	64854	2091.5	2.22092	0.294193	7.54919	4.37969e-14	2.27343e-12	up-regulated
ENSG00000109424	UCP1	uncoupling protein 1 [Source:HGNC Symbol;Acc:HGNC:12517]	7350	8.18422	-4.08533	0.984353	-4.15027	3.32088e-05	0.000365766	down-regulated
ENSG00000109472	CPE	carboxypeptidase E [Source:HGNC Symbol;Acc:HGNC:2303]	1363	20291.1	2.921	0.362499	8.05797	7.75739e-16	4.9544e-14	up-regulated
ENSG00000109625	CPZ	carboxypeptidase Z [Source:HGNC Symbol;Acc:HGNC:2333]	8532	1127.81	-2.73683	0.642893	-4.25705	2.07142e-05	0.00024219	down-regulated
ENSG00000109705	NKX3-2	NK3 homeobox 2 [Source:HGNC Symbol;Acc:HGNC:951]	579	21.5649	-3.7503	0.656721	-5.71065	1.12547e-08	2.88702e-07	down-regulated
ENSG00000109738	GLRB	glycine receptor beta [Source:HGNC Symbol;Acc:HGNC:4329]	2743	294.399	2.99059	0.277284	10.7853	4.03961e-27	6.68967e-25	up-regulated
ENSG00000109771	LRP2BP	LRP2 binding protein [Source:HGNC Symbol;Acc:HGNC:25434]	55805	459.073	2.51868	0.401224	6.27748	3.44095e-10	1.11983e-08	up-regulated
ENSG00000109846	CRYAB	crystallin alpha B [Source:HGNC Symbol;Acc:HGNC:2389]	1410	8084.46	2.45205	0.496749	4.93618	7.9666e-07	1.36519e-05	up-regulated
ENSG00000109956	B3GAT1	beta-1,3-glucuronyltransferase 1 [Source:HGNC Symbol;Acc:HGNC:921]	27087	1171.64	5.65587	0.345428	16.3735	2.95555e-60	3.95051e-57	up-regulated
ENSG00000110076	NRXN2	neurexin 2 [Source:HGNC Symbol;Acc:HGNC:8009]	9379	2582.95	3.77436	0.257673	14.6478	1.39059e-48	1.06213e-45	up-regulated
ENSG00000110427	KIAA1549L	KIAA1549 like [Source:HGNC Symbol;Acc:HGNC:24836]	25758	791.46	3.04731	0.358449	8.50137	1.87367e-17	1.40248e-15	up-regulated
ENSG00000110436	SLC1A2	solute carrier family 1 member 2 [Source:HGNC Symbol;Acc:HGNC:10940]	6506	5419.66	7.0352	0.513974	13.6879	1.19983e-42	5.90851e-40	up-regulated
ENSG00000110492	MDK	midkine [Source:HGNC Symbol;Acc:HGNC:6972]	4192	6581.5	-2.34743	0.529248	-4.4354	9.19005e-06	0.000119385	down-regulated
ENSG00000110675	ELMOD1	ELMO domain containing 1 [Source:HGNC Symbol;Acc:HGNC:25334]	55531	430.705	3.5267	0.419969	8.39753	4.55965e-17	3.2629e-15	up-regulated
ENSG00000110693	SOX6	SRY-box transcription factor 6 [Source:HGNC Symbol;Acc:HGNC:16421]	55553	890.186	3.42171	0.397664	8.60454	7.66237e-18	5.95417e-16	up-regulated
ENSG00000110887	DAO	D-amino acid oxidase [Source:HGNC Symbol;Acc:HGNC:2671]	1610	75.9347	5.2726	1.02187	5.15976	2.47264e-07	4.75545e-06	up-regulated
ENSG00000110900	TSPAN11	tetraspanin 11 [Source:HGNC Symbol;Acc:HGNC:30795]	441631	1080.19	2.71139	0.463084	5.85507	4.76819e-09	1.30736e-07	up-regulated
ENSG00000111262	KCNA1	potassium voltage-gated channel subfamily A member 1 [Source:HGNC Symbol;Acc:HGNC:6218]	3736	50.6762	2.85452	0.607894	4.69576	2.65622e-06	4.02313e-05	up-regulated
ENSG00000111728	ST8SIA1	ST8 alpha-N-acetyl-neuraminide alpha-2,8-sialyltransferase 1 [Source:HGNC Symbol;Acc:HGNC:10869]	6489	764.664	3.12291	0.479289	6.51572	7.23425e-11	2.54943e-09	up-regulated
ENSG00000111783	RFX4	regulatory factor X4 [Source:HGNC Symbol;Acc:HGNC:9985]	5992	1703.43	6.77209	0.531428	12.7432	3.40147e-37	1.08806e-34	up-regulated
ENSG00000111834	RSPH4A	radial spoke head component 4A [Source:HGNC Symbol;Acc:HGNC:21558]	345895	360.037	4.52969	0.324854	13.9438	3.43398e-44	1.89e-41	up-regulated
ENSG00000111879	FAM184A	family with sequence similarity 184 member A [Source:HGNC Symbol;Acc:HGNC:20991]	79632	382.767	2.21615	0.412453	5.3731	7.73932e-08	1.67622e-06	up-regulated
ENSG00000111962	UST	uronyl 2-sulfotransferase [Source:HGNC Symbol;Acc:HGNC:17223]	10090	3111.37	2.72045	0.380633	7.14717	8.85832e-13	3.8821e-11	up-regulated
ENSG00000112041	TULP1	TUB like protein 1 [Source:HGNC Symbol;Acc:HGNC:12423]	7287	116.622	-3.78578	0.867626	-4.36338	1.28069e-05	0.000158764	down-regulated
ENSG00000112096	SOD2	superoxide dismutase 2 [Source:HGNC Symbol;Acc:HGNC:11180]	6648	21492.8	2.25637	0.485543	4.6471	3.36631e-06	4.96014e-05	up-regulated
ENSG00000112175	BMP5	bone morphogenetic protein 5 [Source:HGNC Symbol;Acc:HGNC:1072]	653	141.204	-3.16065	0.780828	-4.04782	5.1697e-05	0.000530057	down-regulated
ENSG00000112183	RBM24	RNA binding motif protein 24 [Source:HGNC Symbol;Acc:HGNC:21539]	221662	97.2645	2.23674	0.45509	4.91494	8.88108e-07	1.50523e-05	up-regulated
ENSG00000112186	CAP2	cyclase associated actin cytoskeleton regulatory protein 2 [Source:HGNC Symbol;Acc:HGNC:20039]	10486	545.268	2.11622	0.411789	5.1391	2.76052e-07	5.25243e-06	up-regulated
ENSG00000112276	BVES	blood vessel epicardial substance [Source:HGNC Symbol;Acc:HGNC:1152]	11149	227.673	2.85508	0.46429	6.14935	7.78029e-10	2.43059e-08	up-regulated
ENSG00000112280	COL9A1	collagen type IX alpha 1 chain [Source:HGNC Symbol;Acc:HGNC:2217]	1297	152.003	3.70234	0.711432	5.20407	1.94969e-07	3.83442e-06	up-regulated
ENSG00000112309	B3GAT2	beta-1,3-glucuronyltransferase 2 [Source:HGNC Symbol;Acc:HGNC:922]	135152	5827.58	2.89898	0.395718	7.32587	2.37357e-13	1.13163e-11	up-regulated
ENSG00000112333	NR2E1	nuclear receptor subfamily 2 group E member 1 [Source:HGNC Symbol;Acc:HGNC:7973]	7101	247.063	6.34897	0.767863	8.26836	1.35813e-16	9.39543e-15	up-regulated
ENSG00000112530	PACRG	parkin coregulated [Source:HGNC Symbol;Acc:HGNC:19152]	135138	472.466	2.35866	0.518691	4.54733	5.43311e-06	7.52274e-05	up-regulated
ENSG00000112531	QKI	QKI, KH domain containing RNA binding [Source:HGNC Symbol;Acc:HGNC:21100]	9444	13804.2	2.63559	0.411546	6.40411	1.51245e-10	5.13656e-09	up-regulated
ENSG00000112539	C6orf118	chromosome 6 open reading frame 118 [Source:HGNC Symbol;Acc:HGNC:21233]	168090	170.271	7.21125	0.436589	16.5173	2.75596e-61	4.12578e-58	up-regulated
ENSG00000112981	NME5	NME/NM23 family member 5 [Source:HGNC Symbol;Acc:HGNC:7853]	8382	258.212	3.074	0.649894	4.73001	2.24509e-06	3.4507e-05	up-regulated
ENSG00000113231	PDE8B	phosphodiesterase 8B [Source:HGNC Symbol;Acc:HGNC:8794]	8622	1071.05	2.8277	0.326237	8.66763	4.41227e-18	3.53605e-16	up-regulated
ENSG00000113296	THBS4	thrombospondin 4 [Source:HGNC Symbol;Acc:HGNC:11788]	7060	1862.29	5.18393	0.382504	13.5526	7.64291e-42	3.48833e-39	up-regulated
ENSG00000113578	FGF1	fibroblast growth factor 1 [Source:HGNC Symbol;Acc:HGNC:3665]	2246	5930.58	5.79119	0.460726	12.5697	3.09832e-36	9.20299e-34	up-regulated
ENSG00000113594	LIFR	LIF receptor subunit alpha [Source:HGNC Symbol;Acc:HGNC:6597]	3977	5747.13	4.57269	0.538168	8.49677	1.94932e-17	1.45329e-15	up-regulated
ENSG00000113645	WWC1	WW and C2 domain containing 1 [Source:HGNC Symbol;Acc:HGNC:29435]	23286	2245.19	2.9549	0.347688	8.49872	1.91692e-17	1.43199e-15	up-regulated
ENSG00000113657	DPYSL3	dihydropyrimidinase like 3 [Source:HGNC Symbol;Acc:HGNC:3015]	1809	19982.9	2.68321	0.343454	7.81244	5.60895e-15	3.22955e-13	up-regulated
ENSG00000114200	BCHE	butyrylcholinesterase [Source:HGNC Symbol;Acc:HGNC:983]	590	605.763	6.34387	0.467434	13.5717	5.89524e-42	2.72389e-39	up-regulated
ENSG00000114204	SERPINI2	serpin family I member 2 [Source:HGNC Symbol;Acc:HGNC:8945]	5276	88.629	3.73035	0.713047	5.23157	1.68078e-07	3.35778e-06	up-regulated
ENSG00000114270	COL7A1	collagen type VII alpha 1 chain [Source:HGNC Symbol;Acc:HGNC:2214]	1294	5002.9	-2.6236	0.581766	-4.50971	6.49156e-06	8.82183e-05	down-regulated
ENSG00000114279	FGF12	fibroblast growth factor 12 [Source:HGNC Symbol;Acc:HGNC:3668]	2257	310.098	2.6982	0.604029	4.467	7.93225e-06	0.000105162	up-regulated
ENSG00000114473	IQCG	IQ motif containing G [Source:HGNC Symbol;Acc:HGNC:25251]	84223	1068.72	2.18413	0.334886	6.522	6.9376e-11	2.44719e-09	up-regulated
ENSG00000114646	CSPG5	chondroitin sulfate proteoglycan 5 [Source:HGNC Symbol;Acc:HGNC:2467]	10675	391.108	4.65294	0.46895	9.92204	3.33854e-23	4.01763e-21	up-regulated
ENSG00000114670	NEK11	NIMA related kinase 11 [Source:HGNC Symbol;Acc:HGNC:18593]	79858	1200.28	2.45581	0.351589	6.98489	2.85088e-12	1.18949e-10	up-regulated
ENSG00000114757	PEX5L	peroxisomal biogenesis factor 5 like [Source:HGNC Symbol;Acc:HGNC:30024]	51555	80.0203	2.57942	0.590187	4.37051	1.23958e-05	0.000154354	up-regulated
ENSG00000114790	ARHGEF26	Rho guanine nucleotide exchange factor 26 [Source:HGNC Symbol;Acc:HGNC:24490]	26084	1605.73	2.3654	0.402725	5.87349	4.26721e-09	1.1795e-07	up-regulated
ENSG00000114805	PLCH1	phospholipase C eta 1 [Source:HGNC Symbol;Acc:HGNC:29185]	23007	141.672	2.66669	0.657189	4.05772	4.95551e-05	0.000512051	up-regulated
ENSG00000114853	ZBTB47	zinc finger and BTB domain containing 47 [Source:HGNC Symbol;Acc:HGNC:26955]	92999	4094.38	2.06899	0.250677	8.25361	1.53676e-16	1.0592e-14	up-regulated
ENSG00000114854	TNNC1	troponin C1, slow skeletal and cardiac type [Source:HGNC Symbol;Acc:HGNC:11943]	7134	70.2577	-3.99612	0.902844	-4.42614	9.59326e-06	0.000123977	down-regulated
ENSG00000115041	KCNIP3	potassium voltage-gated channel interacting protein 3 [Source:HGNC Symbol;Acc:HGNC:15523]	30818	351.729	2.40475	0.34621	6.94594	3.75943e-12	1.54616e-10	up-regulated
ENSG00000115194	SLC30A3	solute carrier family 30 member 3 [Source:HGNC Symbol;Acc:HGNC:11014]	7781	23.4052	-2.9058	0.709836	-4.09363	4.24679e-05	0.000450256	down-regulated
ENSG00000115266	APC2	APC regulator of WNT signaling pathway 2 [Source:HGNC Symbol;Acc:HGNC:24036]	10297	6116.12	5.27153	0.232507	22.6726	8.35816e-114	3.12812e-109	up-regulated
ENSG00000115290	GRB14	growth factor receptor bound protein 14 [Source:HGNC Symbol;Acc:HGNC:4565]	2888	50.2949	-2.34438	0.489585	-4.7885	1.68034e-06	2.66703e-05	down-regulated
ENSG00000115380	EFEMP1	EGF containing fibulin extracellular matrix protein 1 [Source:HGNC Symbol;Acc:HGNC:3218]	2202	9307.6	2.67811	0.668122	4.00841	6.11286e-05	0.000610243	up-regulated
ENSG00000115423	DNAH6	dynein axonemal heavy chain 6 [Source:HGNC Symbol;Acc:HGNC:2951]	1768	370.711	2.87618	0.513752	5.59837	2.16374e-08	5.26872e-07	up-regulated
ENSG00000116147	TNR	tenascin R [Source:HGNC Symbol;Acc:HGNC:11953]	7143	2898.1	6.87547	0.506547	13.5732	5.77273e-42	2.70063e-39	up-regulated
ENSG00000116183	PAPPA2	pappalysin 2 [Source:HGNC Symbol;Acc:HGNC:14615]	60676	68.5794	2.85535	0.642334	4.44527	8.77818e-06	0.000114618	up-regulated
ENSG00000116661	FBXO2	F-box protein 2 [Source:HGNC Symbol;Acc:HGNC:13581]	26232	4220.73	2.25814	0.578388	3.90419	9.45421e-05	0.00088392	up-regulated
ENSG00000116675	DNAJC6	DnaJ heat shock protein family (Hsp40) member C6 [Source:HGNC Symbol;Acc:HGNC:15469]	9829	850.39	4.29102	0.252076	17.0227	5.57015e-65	1.0972e-61	up-regulated
ENSG00000116745	RPE65	retinoid isomerohydrolase RPE65 [Source:HGNC Symbol;Acc:HGNC:10294]	6121	126.571	4.6171	0.639856	7.21584	5.36006e-13	2.40823e-11	up-regulated
ENSG00000116983	HPCAL4	hippocalcin like 4 [Source:HGNC Symbol;Acc:HGNC:18212]	51440	675.155	3.93988	0.651058	6.0515	1.43506e-09	4.32437e-08	up-regulated
ENSG00000117115	PADI2	peptidyl arginine deiminase 2 [Source:HGNC Symbol;Acc:HGNC:18341]	11240	3804.61	4.86734	0.556664	8.74375	2.25492e-18	1.84666e-16	up-regulated
ENSG00000117477	CCDC181	coiled-coil domain containing 181 [Source:HGNC Symbol;Acc:HGNC:28051]	57821	278.064	2.28516	0.588266	3.88457	0.000102509	0.00094752	up-regulated
ENSG00000117598	PLPPR5	phospholipid phosphatase related 5 [Source:HGNC Symbol;Acc:HGNC:31703]	163404	48.9741	4.05072	0.704158	5.75257	8.78952e-09	2.3002e-07	up-regulated
ENSG00000117600	PLPPR4	phospholipid phosphatase related 4 [Source:HGNC Symbol;Acc:HGNC:23496]	9890	545.971	2.62234	0.444771	5.89594	3.72552e-09	1.04678e-07	up-regulated
ENSG00000117643	MAN1C1	mannosidase alpha class 1C member 1 [Source:HGNC Symbol;Acc:HGNC:19080]	57134	3666.71	2.32573	0.444189	5.23591	1.64177e-07	3.29367e-06	up-regulated
ENSG00000118271	TTR	transthyretin [Source:HGNC Symbol;Acc:HGNC:12405]	7276	24.0738	4.84594	0.976236	4.9639	6.90911e-07	1.20047e-05	up-regulated
ENSG00000118307	DNAI7	dynein axonemal intermediate chain 7 [Source:HGNC Symbol;Acc:HGNC:29599]	55259	179.264	2.32684	0.429874	5.41283	6.20355e-08	1.36734e-06	up-regulated
ENSG00000118432	CNR1	cannabinoid receptor 1 [Source:HGNC Symbol;Acc:HGNC:2159]	1268	1396.18	2.36893	0.590424	4.01225	6.0143e-05	0.00060217	up-regulated
ENSG00000118492	ADGB	androglobin [Source:HGNC Symbol;Acc:HGNC:21212]	79747	39.3289	4.54014	0.572443	7.93118	2.17075e-15	1.30406e-13	up-regulated
ENSG00000118526	TCF21	transcription factor 21 [Source:HGNC Symbol;Acc:HGNC:11632]	6943	98.3412	-4.71978	0.992904	-4.75351	1.99917e-06	3.11106e-05	down-regulated
ENSG00000118702	GHRH	growth hormone releasing hormone [Source:HGNC Symbol;Acc:HGNC:4265]	2691	47.6791	6.23779	1.22709	5.08339	3.70756e-07	6.84893e-06	up-regulated
ENSG00000118946	PCDH17	protocadherin 17 [Source:HGNC Symbol;Acc:HGNC:14267]	27253	1207.08	2.6989	0.621647	4.34154	1.41487e-05	0.000173218	up-regulated
ENSG00000118997	DNAH7	dynein axonemal heavy chain 7 [Source:HGNC Symbol;Acc:HGNC:18661]	56171	508.617	4.04834	0.426651	9.48865	2.34056e-21	2.50279e-19	up-regulated
ENSG00000119042	SATB2	SATB homeobox 2 [Source:HGNC Symbol;Acc:HGNC:21637]	23314	449.766	2.40513	0.460143	5.22692	1.72361e-07	3.43493e-06	up-regulated
ENSG00000119125	GDA	guanine deaminase [Source:HGNC Symbol;Acc:HGNC:4212]	9615	277.703	4.23184	0.832278	5.08465	3.68302e-07	6.81032e-06	up-regulated
ENSG00000119139	TJP2	tight junction protein 2 [Source:HGNC Symbol;Acc:HGNC:11828]	9414	4812.64	3.01295	0.293873	10.2526	1.15231e-24	1.59138e-22	up-regulated
ENSG00000119280	C1orf198	chromosome 1 open reading frame 198 [Source:HGNC Symbol;Acc:HGNC:25900]	84886	4612.8	2.63115	0.268786	9.789	1.25529e-22	1.46356e-20	up-regulated
ENSG00000119661	DNAL1	dynein axonemal light chain 1 [Source:HGNC Symbol;Acc:HGNC:23247]	83544	1513.53	2.29412	0.230585	9.94913	2.54394e-23	3.10128e-21	up-regulated
ENSG00000119698	PPP4R4	protein phosphatase 4 regulatory subunit 4 [Source:HGNC Symbol;Acc:HGNC:23788]	57718	143.506	3.21909	0.457175	7.04127	1.90502e-12	8.06531e-11	up-regulated
ENSG00000119737	GPR75	G protein-coupled receptor 75 [Source:HGNC Symbol;Acc:HGNC:4526]	10936	422.96	3.74073	0.351394	10.6454	1.83224e-26	2.86918e-24	up-regulated
ENSG00000119866	BCL11A	BAF chromatin remodeling complex subunit BCL11A [Source:HGNC Symbol;Acc:HGNC:13221]	53335	2780.74	-3.08472	0.691184	-4.46296	8.08349e-06	0.000106751	down-regulated
ENSG00000119900	OGFRL1	opioid growth factor receptor like 1 [Source:HGNC Symbol;Acc:HGNC:21378]	79627	11817.8	3.12006	0.495016	6.30295	2.92041e-10	9.59607e-09	up-regulated
ENSG00000119938	PPP1R3C	protein phosphatase 1 regulatory subunit 3C [Source:HGNC Symbol;Acc:HGNC:9293]	5507	642.514	3.20482	0.304728	10.517	7.21559e-26	1.08891e-23	up-regulated
ENSG00000119969	HELLS	helicase, lymphoid specific [Source:HGNC Symbol;Acc:HGNC:4861]	3070	454.739	-2.20385	0.442992	-4.97492	6.52736e-07	1.14209e-05	down-regulated
ENSG00000119973	PRLHR	prolactin releasing hormone receptor [Source:HGNC Symbol;Acc:HGNC:4464]	2834	303.64	5.0643	0.839749	6.03074	1.63214e-09	4.87117e-08	up-regulated
ENSG00000120049	KCNIP2	potassium voltage-gated channel interacting protein 2 [Source:HGNC Symbol;Acc:HGNC:15522]	30819	301.195	2.02622	0.336128	6.02812	1.65876e-09	4.94274e-08	up-regulated
ENSG00000120051	CFAP58	cilia and flagella associated protein 58 [Source:HGNC Symbol;Acc:HGNC:26676]	159686	68.5329	2.22355	0.367988	6.04246	1.51784e-09	4.54817e-08	up-regulated
ENSG00000120251	GRIA2	glutamate ionotropic receptor AMPA type subunit 2 [Source:HGNC Symbol;Acc:HGNC:4572]	2891	842.444	5.11294	0.505612	10.1124	4.86837e-24	6.32651e-22	up-regulated
ENSG00000120262	CCDC170	coiled-coil domain containing 170 [Source:HGNC Symbol;Acc:HGNC:21177]	80129	891.812	2.24398	0.294463	7.62059	2.52513e-14	1.34241e-12	up-regulated
ENSG00000120457	KCNJ5	potassium inwardly rectifying channel subfamily J member 5 [Source:HGNC Symbol;Acc:HGNC:6266]	3762	2076.15	-2.08649	0.425304	-4.90588	9.30076e-07	1.56656e-05	down-regulated
ENSG00000120820	GLT8D2	glycosyltransferase 8 domain containing 2 [Source:HGNC Symbol;Acc:HGNC:24890]	83468	575.782	-2.32486	0.430232	-5.40374	6.52658e-08	1.43012e-06	down-regulated
ENSG00000120885	CLU	clusterin [Source:HGNC Symbol;Acc:HGNC:2095]	1191	103137	2.60728	0.545297	4.78139	1.74086e-06	2.75026e-05	up-regulated
ENSG00000120907	ADRA1A	adrenoceptor alpha 1A [Source:HGNC Symbol;Acc:HGNC:277]	148	303.108	5.11172	0.902506	5.66392	1.47957e-08	3.70894e-07	up-regulated
ENSG00000121207	LRAT	lecithin retinol acyltransferase [Source:HGNC Symbol;Acc:HGNC:6685]	9227	547.93	3.01669	0.687461	4.38817	1.1431e-05	0.0001439	up-regulated
ENSG00000121753	ADGRB2	adhesion G protein-coupled receptor B2 [Source:HGNC Symbol;Acc:HGNC:944]	576	1929.02	3.21174	0.316226	10.1565	3.1007e-24	4.12978e-22	up-regulated
ENSG00000121871	SLITRK3	SLIT and NTRK like family member 3 [Source:HGNC Symbol;Acc:HGNC:23501]	22865	221.369	8.25074	0.596017	13.8431	1.39965e-43	7.48332e-41	up-regulated
ENSG00000122548	KIAA0087	KIAA0087 lncRNA [Source:HGNC Symbol;Acc:HGNC:22191]	9808	19.335	2.98988	0.482544	6.19607	5.78909e-10	1.82837e-08	up-regulated
ENSG00000122584	NXPH1	neurexophilin 1 [Source:HGNC Symbol;Acc:HGNC:20693]	30010	106.9	5.15613	0.943869	5.46276	4.68798e-08	1.05377e-06	up-regulated
ENSG00000122691	TWIST1	twist family bHLH transcription factor 1 [Source:HGNC Symbol;Acc:HGNC:12428]	7291	351.469	-3.24982	0.512815	-6.33722	2.3395e-10	7.80374e-09	down-regulated
ENSG00000122735	DNAI1	dynein axonemal intermediate chain 1 [Source:HGNC Symbol;Acc:HGNC:2954]	27019	102.951	3.88986	0.645368	6.02735	1.66665e-09	4.96229e-08	up-regulated
ENSG00000122756	CNTFR	ciliary neurotrophic factor receptor [Source:HGNC Symbol;Acc:HGNC:2170]	1271	480.727	3.38461	0.753758	4.49031	7.1119e-06	9.58136e-05	up-regulated
ENSG00000123096	SSPN	sarcospan [Source:HGNC Symbol;Acc:HGNC:11322]	8082	4010.06	2.47778	0.421741	5.87513	4.22506e-09	1.17045e-07	up-regulated
ENSG00000123219	CENPK	centromere protein K [Source:HGNC Symbol;Acc:HGNC:29479]	64105	120.196	-2.01693	0.485104	-4.15772	3.21436e-05	0.000355813	down-regulated
ENSG00000123496	IL13RA2	interleukin 13 receptor subunit alpha 2 [Source:HGNC Symbol;Acc:HGNC:5975]	3598	147.159	2.31763	0.437324	5.29958	1.16071e-07	2.4107e-06	up-regulated
ENSG00000123560	PLP1	proteolipid protein 1 [Source:HGNC Symbol;Acc:HGNC:9086]	5354	4674.39	6.6108	0.798901	8.27486	1.28604e-16	8.92976e-15	up-regulated
ENSG00000123977	DAW1	dynein assembly factor with WD repeats 1 [Source:HGNC Symbol;Acc:HGNC:26383]	164781	309.742	7.74924	0.609013	12.7243	4.33497e-37	1.37492e-34	up-regulated
ENSG00000124097	HMGB1P1	high mobility group box 1 pseudogene 1 [Source:HGNC Symbol;Acc:HGNC:4993]	NA	105.005	5.31759	0.428933	12.3973	2.70395e-35	7.72505e-33	up-regulated
ENSG00000124249	KCNK15	potassium two pore domain channel subfamily K member 15 [Source:HGNC Symbol;Acc:HGNC:13814]	60598	154.487	-2.08309	0.417302	-4.99181	5.98162e-07	1.05548e-05	down-regulated
ENSG00000124479	NDP	norrin cystine knot growth factor NDP [Source:HGNC Symbol;Acc:HGNC:7678]	4693	354.516	4.12111	0.568433	7.24995	4.16922e-13	1.91928e-11	up-regulated
ENSG00000124507	PACSIN1	protein kinase C and casein kinase substrate in neurons 1 [Source:HGNC Symbol;Acc:HGNC:8570]	29993	167.172	2.77263	0.694698	3.99112	6.57607e-05	0.000649897	up-regulated
ENSG00000124749	COL21A1	collagen type XXI alpha 1 chain [Source:HGNC Symbol;Acc:HGNC:17025]	81578	604.733	2.93093	0.556133	5.2702	1.36279e-07	2.78101e-06	up-regulated
ENSG00000124935	SCGB1D2	secretoglobin family 1D member 2 [Source:HGNC Symbol;Acc:HGNC:18396]	10647	24.462	7.31713	0.995704	7.3487	2.00138e-13	9.66497e-12	up-regulated
ENSG00000125285	SOX21	SRY-box transcription factor 21 [Source:HGNC Symbol;Acc:HGNC:11197]	11166	798.27	6.96232	0.746965	9.32081	1.15451e-20	1.16153e-18	up-regulated
ENSG00000125355	TMEM255A	transmembrane protein 255A [Source:HGNC Symbol;Acc:HGNC:26086]	55026	1327.27	2.81401	0.578718	4.86249	1.15916e-06	1.9162e-05	up-regulated
ENSG00000125462	MIR9-1HG	MIR9-1 host gene [Source:HGNC Symbol;Acc:HGNC:30780]	10485	2268.48	7.36139	0.728981	10.0982	5.62653e-24	7.28646e-22	up-regulated
ENSG00000125675	GRIA3	glutamate ionotropic receptor AMPA type subunit 3 [Source:HGNC Symbol;Acc:HGNC:4573]	2892	1049.27	4.82276	0.569899	8.46248	2.61753e-17	1.90963e-15	up-regulated
ENSG00000125804	FAM182A	family with sequence similarity 182 member A [Source:HGNC Symbol;Acc:HGNC:16222]	284800	46.1413	3.70115	0.602888	6.13905	8.30189e-10	2.57848e-08	up-regulated
ENSG00000125820	NKX2-2	NK2 homeobox 2 [Source:HGNC Symbol;Acc:HGNC:7835]	4821	199.089	4.73823	0.866431	5.46867	4.53417e-08	1.02412e-06	up-regulated
ENSG00000125999	BPIFB1	BPI fold containing family B member 1 [Source:HGNC Symbol;Acc:HGNC:16108]	92747	6.6043	-6.03157	1.48491	-4.06192	4.86713e-05	0.000504032	down-regulated
ENSG00000126016	AMOT	angiomotin [Source:HGNC Symbol;Acc:HGNC:17810]	154796	2683.19	2.24185	0.554606	4.04224	5.29438e-05	0.000541151	up-regulated
ENSG00000126500	FLRT1	fibronectin leucine rich transmembrane protein 1 [Source:HGNC Symbol;Acc:HGNC:3760]	23769	295.841	2.65416	0.579771	4.57794	4.69573e-06	6.63072e-05	up-regulated
ENSG00000126733	DACH2	dachshund family transcription factor 2 [Source:HGNC Symbol;Acc:HGNC:16814]	117154	26.2184	4.41005	0.731411	6.02951	1.6446e-09	4.90444e-08	up-regulated
ENSG00000126778	SIX1	SIX homeobox 1 [Source:HGNC Symbol;Acc:HGNC:10887]	6495	1009.45	-2.48233	0.555026	-4.47246	7.73235e-06	0.000102913	down-regulated
ENSG00000126861	OMG	oligodendrocyte myelin glycoprotein [Source:HGNC Symbol;Acc:HGNC:8135]	4974	552.704	3.86623	0.805961	4.79704	1.61031e-06	2.57443e-05	up-regulated
ENSG00000126861	OMG	oligodendrocyte myelin glycoprotein [Source:HGNC Symbol;Acc:HGNC:8135]	101927057	552.704	3.86623	0.805961	4.79704	1.61031e-06	2.57443e-05	up-regulated
ENSG00000127241	MASP1	MBL associated serine protease 1 [Source:HGNC Symbol;Acc:HGNC:6901]	5648	2579.95	6.07041	0.468481	12.9576	2.12665e-38	7.58021e-36	up-regulated
ENSG00000127249	ATP13A4	ATPase 13A4 [Source:HGNC Symbol;Acc:HGNC:25422]	84239	862.081	4.62536	0.513447	9.00846	2.0897e-19	1.84891e-17	up-regulated
ENSG00000127328	RAB3IP	RAB3A interacting protein [Source:HGNC Symbol;Acc:HGNC:16508]	117177	1444.52	2.09226	0.350671	5.96645	2.42476e-09	7.02391e-08	up-regulated
ENSG00000127472	PLA2G5	phospholipase A2 group V [Source:HGNC Symbol;Acc:HGNC:9038]	5322	122.733	3.77211	0.638677	5.90613	3.50244e-09	9.8781e-08	up-regulated
ENSG00000127585	FBXL16	F-box and leucine rich repeat protein 16 [Source:HGNC Symbol;Acc:HGNC:14150]	146330	576.496	2.23983	0.45002	4.97717	6.45216e-07	1.13052e-05	up-regulated
ENSG00000127588	GNG13	G protein subunit gamma 13 [Source:HGNC Symbol;Acc:HGNC:14131]	51764	13.0218	-2.8699	0.601726	-4.76945	1.84728e-06	2.89274e-05	down-regulated
ENSG00000128040	SPINK2	serine peptidase inhibitor Kazal type 2 [Source:HGNC Symbol;Acc:HGNC:11245]	6691	17.1304	-2.0081	0.517321	-3.88172	0.000103721	0.000957299	down-regulated
ENSG00000128165	ADM2	adrenomedullin 2 [Source:HGNC Symbol;Acc:HGNC:28898]	79924	78.5562	-2.20435	0.55451	-3.9753	7.02903e-05	0.000687761	down-regulated
ENSG00000128408	RIBC2	RIB43A domain with coiled-coils 2 [Source:HGNC Symbol;Acc:HGNC:13241]	26150	111.605	2.5928	0.481604	5.38367	7.2981e-08	1.58802e-06	up-regulated
ENSG00000128482	RNF112	ring finger protein 112 [Source:HGNC Symbol;Acc:HGNC:12968]	7732	421.93	4.17262	0.38489	10.8411	2.19897e-27	3.72392e-25	up-regulated
ENSG00000128487	SPECC1	sperm antigen with calponin homology and coiled-coil domains 1 [Source:HGNC Symbol;Acc:HGNC:30615]	92521	1746.18	2.23862	0.509472	4.39401	1.11281e-05	0.000140703	up-regulated
ENSG00000128564	VGF	VGF nerve growth factor inducible [Source:HGNC Symbol;Acc:HGNC:12684]	7425	892.866	4.32122	0.695038	6.21725	5.05945e-10	1.61428e-08	up-regulated
ENSG00000128591	FLNC	filamin C [Source:HGNC Symbol;Acc:HGNC:3756]	2318	3195.61	3.18107	0.412339	7.71468	1.21286e-14	6.67534e-13	up-regulated
ENSG00000128606	LRRC17	leucine rich repeat containing 17 [Source:HGNC Symbol;Acc:HGNC:16895]	10234	411.031	-2.28757	0.50223	-4.55482	5.24298e-06	7.30255e-05	down-regulated
ENSG00000128610	FEZF1	FEZ family zinc finger 1 [Source:HGNC Symbol;Acc:HGNC:22788]	389549	58.955	4.54078	0.767975	5.91267	3.36607e-09	9.5222e-08	up-regulated
ENSG00000128872	TMOD2	tropomodulin 2 [Source:HGNC Symbol;Acc:HGNC:11872]	29767	4187.33	3.37528	0.311188	10.8464	2.07357e-27	3.52752e-25	up-regulated
ENSG00000128918	ALDH1A2	aldehyde dehydrogenase 1 family member A2 [Source:HGNC Symbol;Acc:HGNC:15472]	8854	614.873	-2.43359	0.534027	-4.55705	5.18763e-06	7.23908e-05	down-regulated
ENSG00000129151	BBOX1	gamma-butyrobetaine hydroxylase 1 [Source:HGNC Symbol;Acc:HGNC:964]	8424	838.678	4.73482	0.657357	7.20282	5.89807e-13	2.63729e-11	up-regulated
ENSG00000129244	ATP1B2	ATPase Na+/K+ transporting subunit beta 2 [Source:HGNC Symbol;Acc:HGNC:805]	482	8332.74	5.03639	0.558774	9.01329	1.99957e-19	1.77758e-17	up-regulated
ENSG00000129514	FOXA1	forkhead box A1 [Source:HGNC Symbol;Acc:HGNC:5021]	3169	131.32	-4.78224	1.09714	-4.35881	1.3077e-05	0.000161632	down-regulated
ENSG00000129654	FOXJ1	forkhead box J1 [Source:HGNC Symbol;Acc:HGNC:3816]	2302	1814.9	7.45947	0.686691	10.8629	1.73107e-27	2.98557e-25	up-regulated
ENSG00000130035	GALNT8	polypeptide N-acetylgalactosaminyltransferase 8 [Source:HGNC Symbol;Acc:HGNC:4130]	26290	740.904	3.38609	0.577951	5.85878	4.66269e-09	1.28031e-07	up-regulated
ENSG00000130037	KCNA5	potassium voltage-gated channel subfamily A member 5 [Source:HGNC Symbol;Acc:HGNC:6224]	3741	393.526	3.70534	0.608478	6.08952	1.13253e-09	3.45163e-08	up-regulated
ENSG00000130055	GDPD2	glycerophosphodiester phosphodiesterase domain containing 2 [Source:HGNC Symbol;Acc:HGNC:25974]	54857	379.397	4.82956	0.649195	7.43931	1.01213e-13	5.02388e-12	up-regulated
ENSG00000130226	DPP6	dipeptidyl peptidase like 6 [Source:HGNC Symbol;Acc:HGNC:3010]	1804	2455.83	4.57823	0.588356	7.78138	7.17348e-15	4.08016e-13	up-regulated
ENSG00000130283	GDF1	growth differentiation factor 1 [Source:HGNC Symbol;Acc:HGNC:4214]	2657	5666.7	6.01539	0.495277	12.1455	6.05944e-34	1.564e-31	up-regulated
ENSG00000130287	NCAN	neurocan [Source:HGNC Symbol;Acc:HGNC:2465]	1463	2956.12	7.30647	0.858471	8.51103	1.72401e-17	1.29304e-15	up-regulated
ENSG00000130294	KIF1A	kinesin family member 1A [Source:HGNC Symbol;Acc:HGNC:888]	547	7105.53	4.16706	0.508263	8.19863	2.4315e-16	1.64262e-14	up-regulated
ENSG00000130635	COL5A1	collagen type V alpha 1 chain [Source:HGNC Symbol;Acc:HGNC:2209]	1289	10575.7	-2.06426	0.392122	-5.26434	1.40695e-07	2.86021e-06	down-regulated
ENSG00000130988	RGN	regucalcin [Source:HGNC Symbol;Acc:HGNC:9989]	9104	470.834	2.61578	0.51527	5.07652	3.84414e-07	7.06981e-06	up-regulated
ENSG00000131018	SYNE1	spectrin repeat containing nuclear envelope protein 1 [Source:HGNC Symbol;Acc:HGNC:17089]	23345	6534.5	2.76003	0.452521	6.09923	1.06582e-09	3.26427e-08	up-regulated
ENSG00000131044	TTLL9	tubulin tyrosine ligase like 9 [Source:HGNC Symbol;Acc:HGNC:16118]	164395	229.572	3.21374	0.24044	13.3661	9.54515e-41	4.05951e-38	up-regulated
ENSG00000131055	COX4I2	cytochrome c oxidase subunit 4I2 [Source:HGNC Symbol;Acc:HGNC:16232]	84701	116.11	-2.02114	0.382612	-5.28248	1.27446e-07	2.62076e-06	down-regulated
ENSG00000131094	C1QL1	complement C1q like 1 [Source:HGNC Symbol;Acc:HGNC:24182]	10882	3508.1	6.78501	0.519254	13.0668	5.09426e-39	1.96554e-36	up-regulated
ENSG00000131095	GFAP	glial fibrillary acidic protein [Source:HGNC Symbol;Acc:HGNC:4235]	2670	256348	4.59337	1.131	4.06134	4.87918e-05	0.000505	up-regulated
ENSG00000131386	GALNT15	polypeptide N-acetylgalactosaminyltransferase 15 [Source:HGNC Symbol;Acc:HGNC:21531]	117248	10967.9	6.36645	0.468462	13.5901	4.58366e-42	2.17149e-39	up-regulated
ENSG00000131389	SLC6A6	solute carrier family 6 member 6 [Source:HGNC Symbol;Acc:HGNC:11052]	6533	4311.44	-2.21518	0.394617	-5.61349	1.98285e-08	4.87582e-07	down-regulated
ENSG00000131409	LRRC4B	leucine rich repeat containing 4B [Source:HGNC Symbol;Acc:HGNC:25042]	94030	1908.09	2.99009	0.519334	5.75755	8.53437e-09	2.23988e-07	up-regulated
ENSG00000131711	MAP1B	microtubule associated protein 1B [Source:HGNC Symbol;Acc:HGNC:6836]	4131	18320	2.84191	0.49072	5.79132	6.98361e-09	1.85499e-07	up-regulated
ENSG00000131771	PPP1R1B	protein phosphatase 1 regulatory inhibitor subunit 1B [Source:HGNC Symbol;Acc:HGNC:9287]	84152	3112.77	3.427	0.785568	4.36245	1.28611e-05	0.000159385	up-regulated
ENSG00000131773	KHDRBS3	KH RNA binding domain containing, signal transduction associated 3 [Source:HGNC Symbol;Acc:HGNC:18117]	10656	1159.09	2.327	0.302116	7.70234	1.33595e-14	7.33127e-13	up-regulated
ENSG00000131941	RHPN2	rhophilin Rho GTPase binding protein 2 [Source:HGNC Symbol;Acc:HGNC:19974]	85415	410.961	3.27153	0.280533	11.6618	1.99685e-31	4.37041e-29	up-regulated
ENSG00000131951	LRRC9	leucine rich repeat containing 9 [Source:HGNC Symbol;Acc:HGNC:19848]	341883	184.783	5.0783	0.634772	8.0002	1.24222e-15	7.73568e-14	up-regulated
ENSG00000132329	RAMP1	receptor activity modifying protein 1 [Source:HGNC Symbol;Acc:HGNC:9843]	10267	3473.63	2.18639	0.453927	4.81661	1.46019e-06	2.36167e-05	up-regulated
ENSG00000132554	RGS22	regulator of G protein signaling 22 [Source:HGNC Symbol;Acc:HGNC:24499]	26166	193.302	3.9995	0.485766	8.2334	1.81977e-16	1.24056e-14	up-regulated
ENSG00000132561	MATN2	matrilin 2 [Source:HGNC Symbol;Acc:HGNC:6908]	4147	5157.52	2.03878	0.372259	5.47679	4.33106e-08	9.85376e-07	up-regulated
ENSG00000132563	REEP2	receptor accessory protein 2 [Source:HGNC Symbol;Acc:HGNC:17975]	51308	2375.67	2.63535	0.496355	5.3094	1.09984e-07	2.29831e-06	up-regulated
ENSG00000132613	MTSS2	MTSS I-BAR domain containing 2 [Source:HGNC Symbol;Acc:HGNC:25094]	92154	14287.3	3.58314	0.369383	9.70035	3.00472e-22	3.39742e-20	up-regulated
ENSG00000132639	SNAP25	synaptosome associated protein 25 [Source:HGNC Symbol;Acc:HGNC:11132]	6616	485.381	2.44032	0.496659	4.91347	8.94806e-07	1.51397e-05	up-regulated
ENSG00000132688	NES	nestin [Source:HGNC Symbol;Acc:HGNC:7756]	10763	5424.63	2.83514	0.494963	5.72799	1.01627e-08	2.63217e-07	up-regulated
ENSG00000132692	BCAN	brevican [Source:HGNC Symbol;Acc:HGNC:23059]	63827	4310.87	7.52316	0.518935	14.4973	1.26018e-47	9.06989e-45	up-regulated
ENSG00000132702	HAPLN2	hyaluronan and proteoglycan link protein 2 [Source:HGNC Symbol;Acc:HGNC:17410]	60484	57.826	2.53081	0.617256	4.10009	4.12987e-05	0.00044023	up-regulated
ENSG00000132718	SYT11	synaptotagmin 11 [Source:HGNC Symbol;Acc:HGNC:19239]	23208	8144.84	4.53092	0.510374	8.87766	6.82831e-19	5.83462e-17	up-regulated
ENSG00000132744	ACY3	aminoacylase 3 [Source:HGNC Symbol;Acc:HGNC:24104]	91703	59.2181	3.724	0.538511	6.91536	4.66686e-12	1.89233e-10	up-regulated
ENSG00000132749	TESMIN	testis expressed metallothionein like protein [Source:HGNC Symbol;Acc:HGNC:7446]	9633	213.583	-2.60373	0.566389	-4.59707	4.28472e-06	6.12294e-05	down-regulated
ENSG00000132821	VSTM2L	V-set and transmembrane domain containing 2 like [Source:HGNC Symbol;Acc:HGNC:16096]	128434	662.91	2.27505	0.427669	5.31965	1.03969e-07	2.1848e-06	up-regulated
ENSG00000132872	SYT4	synaptotagmin 4 [Source:HGNC Symbol;Acc:HGNC:11512]	6860	359.81	2.86841	0.713686	4.01915	5.8409e-05	0.000587955	up-regulated
ENSG00000132970	WASF3	WASP family member 3 [Source:HGNC Symbol;Acc:HGNC:12734]	10810	2116.32	3.31394	0.353575	9.37268	7.0715e-21	7.29085e-19	up-regulated
ENSG00000133083	DCLK1	doublecortin like kinase 1 [Source:HGNC Symbol;Acc:HGNC:2700]	9201	4381.73	3.5968	0.512075	7.02397	2.15648e-12	9.07857e-11	up-regulated
ENSG00000133665	DYDC2	DPY30 domain containing 2 [Source:HGNC Symbol;Acc:HGNC:23468]	84332	95.5401	4.30937	0.683926	6.30092	2.95877e-10	9.70509e-09	up-regulated
ENSG00000133863	TEX15	testis expressed 15, meiosis and synapsis associated [Source:HGNC Symbol;Acc:HGNC:11738]	56154	22.7831	2.63377	0.63836	4.12584	3.69388e-05	0.000400716	up-regulated
ENSG00000133958	UNC79	unc-79 homolog, NALCN channel complex subunit [Source:HGNC Symbol;Acc:HGNC:19966]	57578	155.178	2.16754	0.393854	5.50343	3.7248e-08	8.60521e-07	up-regulated
ENSG00000134042	MRO	maestro [Source:HGNC Symbol;Acc:HGNC:24121]	83876	1091.42	4.39343	0.607266	7.23478	4.66293e-13	2.12823e-11	up-regulated
ENSG00000134207	SYT6	synaptotagmin 6 [Source:HGNC Symbol;Acc:HGNC:18638]	148281	178.94	2.86732	0.591934	4.84399	1.27255e-06	2.08614e-05	up-regulated
ENSG00000134215	VAV3	vav guanine nucleotide exchange factor 3 [Source:HGNC Symbol;Acc:HGNC:12659]	10451	1710.69	-2.10575	0.512762	-4.10669	4.01374e-05	0.000430055	down-regulated
ENSG00000134222	PSRC1	proline and serine rich coiled-coil 1 [Source:HGNC Symbol;Acc:HGNC:24472]	84722	983.614	2.81381	0.254741	11.0458	2.29755e-28	4.15402e-26	up-regulated
ENSG00000134259	NGF	nerve growth factor [Source:HGNC Symbol;Acc:HGNC:7808]	4803	54.9626	-2.649	0.635031	-4.17145	3.02668e-05	0.000337937	down-regulated
ENSG00000134376	CRB1	crumbs cell polarity complex component 1 [Source:HGNC Symbol;Acc:HGNC:2343]	23418	425.65	6.46535	0.517489	12.4937	8.08154e-36	2.36297e-33	up-regulated
ENSG00000134532	SOX5	SRY-box transcription factor 5 [Source:HGNC Symbol;Acc:HGNC:11201]	6660	288.632	3.26957	0.402416	8.12485	4.47927e-16	2.93079e-14	up-regulated
ENSG00000134548	SPX	spexin hormone [Source:HGNC Symbol;Acc:HGNC:28139]	80763	473.512	6.67394	0.588945	11.332	9.10675e-30	1.83241e-27	up-regulated
ENSG00000134595	SOX3	SRY-box transcription factor 3 [Source:HGNC Symbol;Acc:HGNC:11199]	6658	29.5273	3.9399	0.823309	4.78545	1.70609e-06	2.70216e-05	up-regulated
ENSG00000134769	DTNA	dystrobrevin alpha [Source:HGNC Symbol;Acc:HGNC:3057]	1837	12839.4	6.47934	0.309422	20.9402	2.3073e-97	1.43922e-93	up-regulated
ENSG00000134817	APLNR	apelin receptor [Source:HGNC Symbol;Acc:HGNC:339]	187	12197.2	5.49523	0.701137	7.8376	4.59253e-15	2.68144e-13	up-regulated
ENSG00000134824	FADS2	fatty acid desaturase 2 [Source:HGNC Symbol;Acc:HGNC:3575]	9415	8046.51	3.66921	0.27137	13.5211	1.17479e-41	5.2973e-39	up-regulated
ENSG00000134873	CLDN10	claudin 10 [Source:HGNC Symbol;Acc:HGNC:2033]	9071	255.777	3.02904	0.65216	4.64463	3.40689e-06	5.01598e-05	up-regulated
ENSG00000134982	APC	APC regulator of WNT signaling pathway [Source:HGNC Symbol;Acc:HGNC:583]	324	3331.46	2.43384	0.275371	8.83839	9.71082e-19	8.16712e-17	up-regulated
ENSG00000135063	FAM189A2	family with sequence similarity 189 member A2 [Source:HGNC Symbol;Acc:HGNC:24820]	9413	911.329	3.34383	0.414488	8.06738	7.18216e-16	4.61063e-14	up-regulated
ENSG00000135069	PSAT1	phosphoserine aminotransferase 1 [Source:HGNC Symbol;Acc:HGNC:19129]	29968	2393.09	3.32701	0.383069	8.68513	3.78307e-18	3.0514e-16	up-regulated
ENSG00000135144	DTX1	deltex E3 ubiquitin ligase 1 [Source:HGNC Symbol;Acc:HGNC:3060]	1840	979.498	2.06936	0.381735	5.42092	5.92915e-08	1.31227e-06	up-regulated
ENSG00000135363	LMO2	LIM domain only 2 [Source:HGNC Symbol;Acc:HGNC:6642]	4005	1820.76	2.09283	0.386905	5.40917	6.33165e-08	1.39311e-06	up-regulated
ENSG00000135424	ITGA7	integrin subunit alpha 7 [Source:HGNC Symbol;Acc:HGNC:6143]	3679	3092.62	3.4228	0.430101	7.95814	1.74649e-15	1.05939e-13	up-regulated
ENSG00000135454	B4GALNT1	beta-1,4-N-acetyl-galactosaminyltransferase 1 [Source:HGNC Symbol;Acc:HGNC:4117]	2583	488.308	2.05634	0.305847	6.72344	1.77484e-11	6.73681e-10	up-regulated
ENSG00000135472	FAIM2	Fas apoptotic inhibitory molecule 2 [Source:HGNC Symbol;Acc:HGNC:17067]	23017	5991.98	6.0087	0.461955	13.0071	1.11455e-38	4.08951e-36	up-regulated
ENSG00000135577	NMBR	neuromedin B receptor [Source:HGNC Symbol;Acc:HGNC:7843]	4829	15.7458	2.45028	0.48424	5.06005	4.19147e-07	7.66341e-06	up-regulated
ENSG00000135643	KCNMB4	potassium calcium-activated channel subfamily M regulatory beta subunit 4 [Source:HGNC Symbol;Acc:HGNC:6289]	27345	615.371	2.65203	0.390789	6.78635	1.15009e-11	4.52612e-10	up-regulated
ENSG00000135744	AGT	angiotensinogen [Source:HGNC Symbol;Acc:HGNC:333]	183	6705.41	4.36489	0.406714	10.7321	7.19574e-27	1.1709e-24	up-regulated
ENSG00000135773	CAPN9	calpain 9 [Source:HGNC Symbol;Acc:HGNC:1486]	10753	49.0055	2.84931	0.569597	5.00233	5.66409e-07	1.00514e-05	up-regulated
ENSG00000135916	ITM2C	integral membrane protein 2C [Source:HGNC Symbol;Acc:HGNC:6175]	81618	20633.1	3.22897	0.395469	8.16491	3.21684e-16	2.13843e-14	up-regulated
ENSG00000136149	RPL13AP25	ribosomal protein L13a pseudogene 25 [Source:HGNC Symbol;Acc:HGNC:36981]	NA	128.427	-2.17541	0.459154	-4.73788	2.1597e-06	3.33178e-05	down-regulated
ENSG00000136193	SCRN1	secernin 1 [Source:HGNC Symbol;Acc:HGNC:22192]	9805	8079.13	2.38991	0.355313	6.72622	1.74126e-11	6.62955e-10	up-regulated
ENSG00000136267	DGKB	diacylglycerol kinase beta [Source:HGNC Symbol;Acc:HGNC:2850]	1607	248.228	6.30627	0.655167	9.62543	6.24429e-22	6.89377e-20	up-regulated
ENSG00000136274	NACAD	NAC alpha domain containing [Source:HGNC Symbol;Acc:HGNC:22196]	23148	946.437	2.34368	0.484984	4.8325	1.34832e-06	2.19974e-05	up-regulated
ENSG00000136297	MMD2	monocyte to macrophage differentiation associated 2 [Source:HGNC Symbol;Acc:HGNC:30133]	221938	85.6065	4.77156	0.714832	6.67508	2.47102e-11	9.22039e-10	up-regulated
ENSG00000136546	SCN7A	sodium voltage-gated channel alpha subunit 7 [Source:HGNC Symbol;Acc:HGNC:10594]	6332	319.428	3.84048	0.738424	5.20092	1.98308e-07	3.896e-06	up-regulated
ENSG00000136802	LRRC8A	leucine rich repeat containing 8 VRAC subunit A [Source:HGNC Symbol;Acc:HGNC:19027]	56262	5979.28	2.00328	0.357708	5.60033	2.1395e-08	5.21647e-07	up-regulated
ENSG00000136928	GABBR2	gamma-aminobutyric acid type B receptor subunit 2 [Source:HGNC Symbol;Acc:HGNC:4507]	9568	128.155	3.58328	0.576126	6.21962	4.98367e-10	1.59282e-08	up-regulated
ENSG00000137261	KIAA0319	KIAA0319 [Source:HGNC Symbol;Acc:HGNC:21580]	9856	417.372	4.73022	0.409861	11.541	8.19288e-31	1.72262e-28	up-regulated
ENSG00000137285	TUBB2B	tubulin beta 2B class IIb [Source:HGNC Symbol;Acc:HGNC:30829]	347733	7405.96	3.71854	0.640595	5.80482	6.44366e-09	1.73123e-07	up-regulated
ENSG00000137502	RAB30	RAB30, member RAS oncogene family [Source:HGNC Symbol;Acc:HGNC:9770]	27314	1828.11	2.57456	0.298509	8.62471	6.42534e-18	5.05199e-16	up-regulated
ENSG00000137691	CFAP300	cilia and flagella associated protein 300 [Source:HGNC Symbol;Acc:HGNC:28188]	85016	273.477	2.66927	0.482822	5.52848	3.23026e-08	7.57492e-07	up-regulated
ENSG00000137731	FXYD2	FXYD domain containing ion transport regulator 2 [Source:HGNC Symbol;Acc:HGNC:4026]	486	83.1129	-2.84408	0.455377	-6.24556	4.2228e-10	1.36244e-08	down-regulated
ENSG00000137941	TTLL7	tubulin tyrosine ligase like 7 [Source:HGNC Symbol;Acc:HGNC:26242]	79739	851.59	4.23241	0.357449	11.8406	2.40732e-32	5.59604e-30	up-regulated
ENSG00000138083	SIX3	SIX homeobox 3 [Source:HGNC Symbol;Acc:HGNC:10889]	6496	931.419	4.47826	0.787448	5.68705	1.29251e-08	3.28179e-07	up-regulated
ENSG00000138311	ZNF365	zinc finger protein 365 [Source:HGNC Symbol;Acc:HGNC:18194]	22891	311.418	2.21117	0.39543	5.59182	2.24706e-08	5.44326e-07	up-regulated
ENSG00000138400	MDH1B	malate dehydrogenase 1B [Source:HGNC Symbol;Acc:HGNC:17836]	130752	258.807	2.13289	0.498007	4.28286	1.84509e-05	0.000218457	up-regulated
ENSG00000138650	PCDH10	protocadherin 10 [Source:HGNC Symbol;Acc:HGNC:13404]	57575	899.455	6.5042	0.389008	16.72	9.37626e-63	1.46215e-59	up-regulated
ENSG00000138685	FGF2	fibroblast growth factor 2 [Source:HGNC Symbol;Acc:HGNC:3676]	2247	2031.77	2.37062	0.38772	6.11427	9.70028e-10	2.9831e-08	up-regulated
ENSG00000138696	BMPR1B	bone morphogenetic protein receptor type 1B [Source:HGNC Symbol;Acc:HGNC:1077]	658	685.707	3.95439	0.631576	6.26115	3.8216e-10	1.2394e-08	up-regulated
ENSG00000138735	PDE5A	phosphodiesterase 5A [Source:HGNC Symbol;Acc:HGNC:8784]	8654	3374.98	-2.65976	0.610498	-4.3567	1.32038e-05	0.000162929	down-regulated
ENSG00000138798	EGF	epidermal growth factor [Source:HGNC Symbol;Acc:HGNC:3229]	1950	106.654	3.06211	0.534767	5.72605	1.02793e-08	2.65686e-07	up-regulated
ENSG00000138823	MTTP	microsomal triglyceride transfer protein [Source:HGNC Symbol;Acc:HGNC:7467]	4547	81.3169	3.35142	0.63913	5.24373	1.57364e-07	3.1647e-06	up-regulated
ENSG00000139155	SLCO1C1	solute carrier organic anion transporter family member 1C1 [Source:HGNC Symbol;Acc:HGNC:13819]	53919	273.033	3.69975	0.612102	6.04434	1.50026e-09	4.50272e-08	up-regulated
ENSG00000139220	PPFIA2	PTPRF interacting protein alpha 2 [Source:HGNC Symbol;Acc:HGNC:9246]	8499	338.164	3.87869	0.435831	8.89952	5.60909e-19	4.84817e-17	up-regulated
ENSG00000139352	ASCL1	achaete-scute family bHLH transcription factor 1 [Source:HGNC Symbol;Acc:HGNC:738]	429	733.877	5.51944	0.814228	6.77873	1.21237e-11	4.73632e-10	up-regulated
ENSG00000139364	TMEM132B	transmembrane protein 132B [Source:HGNC Symbol;Acc:HGNC:29397]	114795	523.477	4.63531	0.498418	9.30006	1.40372e-20	1.38983e-18	up-regulated
ENSG00000139537	CCDC65	coiled-coil domain containing 65 [Source:HGNC Symbol;Acc:HGNC:29937]	85478	193.641	2.18071	0.306603	7.1125	1.13961e-12	4.91937e-11	up-regulated
ENSG00000139714	MORN3	MORN repeat containing 3 [Source:HGNC Symbol;Acc:HGNC:29807]	283385	355.758	2.78725	0.276137	10.0937	5.88907e-24	7.60015e-22	up-regulated
ENSG00000139737	SLAIN1	SLAIN motif family member 1 [Source:HGNC Symbol;Acc:HGNC:26387]	122060	1085.79	3.04402	0.382047	7.96768	1.61682e-15	9.90362e-14	up-regulated
ENSG00000139910	NOVA1	NOVA alternative splicing regulator 1 [Source:HGNC Symbol;Acc:HGNC:7886]	4857	1566.25	2.11283	0.541859	3.89923	9.64982e-05	0.000899512	up-regulated
ENSG00000139915	MDGA2	MAM domain containing glycosylphosphatidylinositol anchor 2 [Source:HGNC Symbol;Acc:HGNC:19835]	161357	203.177	3.63167	0.765777	4.74246	2.11135e-06	3.26662e-05	up-regulated
ENSG00000139970	RTN1	reticulon 1 [Source:HGNC Symbol;Acc:HGNC:10467]	6252	3548.46	3.38471	0.661711	5.1151	3.1358e-07	5.89454e-06	up-regulated
ENSG00000139973	SYT16	synaptotagmin 16 [Source:HGNC Symbol;Acc:HGNC:23142]	83851	329.277	2.95006	0.65853	4.47977	7.47235e-06	9.9843e-05	up-regulated
ENSG00000140057	AK7	adenylate kinase 7 [Source:HGNC Symbol;Acc:HGNC:20091]	122481	411.475	4.21671	0.370147	11.392	4.58335e-30	9.32264e-28	up-regulated
ENSG00000140067	FAM181A	family with sequence similarity 181 member A [Source:HGNC Symbol;Acc:HGNC:20491]	90050	325.722	7.08459	0.671908	10.544	5.41607e-26	8.23991e-24	up-regulated
ENSG00000140090	SLC24A4	solute carrier family 24 member 4 [Source:HGNC Symbol;Acc:HGNC:10978]	123041	267.784	2.38258	0.506353	4.70537	2.53407e-06	3.85842e-05	up-regulated
ENSG00000140323	DISP2	dispatched RND transporter family member 2 [Source:HGNC Symbol;Acc:HGNC:19712]	85455	320.225	2.62111	0.508573	5.15386	2.55172e-07	4.88994e-06	up-regulated
ENSG00000140450	ARRDC4	arrestin domain containing 4 [Source:HGNC Symbol;Acc:HGNC:28087]	91947	3704.47	2.96946	0.376394	7.88923	3.04056e-15	1.80343e-13	up-regulated
ENSG00000140522	RLBP1	retinaldehyde binding protein 1 [Source:HGNC Symbol;Acc:HGNC:10024]	6017	44.0249	3.46624	0.746337	4.64434	3.41163e-06	5.02098e-05	up-regulated
ENSG00000140527	WDR93	WD repeat domain 93 [Source:HGNC Symbol;Acc:HGNC:26924]	56964	72.8659	2.1687	0.549767	3.94476	7.98795e-05	0.000765968	up-regulated
ENSG00000140538	NTRK3	neurotrophic receptor tyrosine kinase 3 [Source:HGNC Symbol;Acc:HGNC:8033]	4916	1721.8	2.40777	0.547487	4.39787	1.09319e-05	0.000138596	up-regulated
ENSG00000140795	MYLK3	myosin light chain kinase 3 [Source:HGNC Symbol;Acc:HGNC:29826]	91807	203.27	4.76498	0.549566	8.67044	4.30454e-18	3.45712e-16	up-regulated
ENSG00000140839	CLEC18B	C-type lectin domain family 18 member B [Source:HGNC Symbol;Acc:HGNC:33849]	497190	96.8322	2.74862	0.353845	7.76787	7.9814e-15	4.51227e-13	up-regulated
ENSG00000141255	SPATA22	spermatogenesis associated 22 [Source:HGNC Symbol;Acc:HGNC:30705]	84690	26.5479	2.16499	0.363697	5.95273	2.63702e-09	7.59533e-08	up-regulated
ENSG00000141441	GAREM1	GRB2 associated regulator of MAPK1 subtype 1 [Source:HGNC Symbol;Acc:HGNC:26136]	64762	672.006	2.24195	0.365536	6.13332	8.60664e-10	2.66429e-08	up-regulated
ENSG00000141448	GATA6	GATA binding protein 6 [Source:HGNC Symbol;Acc:HGNC:4174]	2627	193.676	-3.16046	0.629906	-5.01735	5.23894e-07	9.36355e-06	down-regulated
ENSG00000141469	SLC14A1	solute carrier family 14 member 1 (Kidd blood group) [Source:HGNC Symbol;Acc:HGNC:10918]	6563	3056.88	7.3715	0.577686	12.7604	2.72822e-37	8.87882e-35	up-regulated
ENSG00000141519	CCDC40	coiled-coil domain containing 40 [Source:HGNC Symbol;Acc:HGNC:26090]	55036	1018.65	2.26084	0.291309	7.76095	8.42935e-15	4.75116e-13	up-regulated
ENSG00000141576	RNF157	ring finger protein 157 [Source:HGNC Symbol;Acc:HGNC:29402]	114804	1022	3.93682	0.450302	8.74262	2.27773e-18	1.86127e-16	up-regulated
ENSG00000141639	MAPK4	mitogen-activated protein kinase 4 [Source:HGNC Symbol;Acc:HGNC:6878]	5596	2970.31	5.06444	0.367737	13.7719	3.76135e-43	1.95517e-40	up-regulated
ENSG00000141837	CACNA1A	calcium voltage-gated channel subunit alpha1 A [Source:HGNC Symbol;Acc:HGNC:1388]	773	553.47	2.50031	0.490599	5.09645	3.46078e-07	6.44715e-06	up-regulated
ENSG00000142102	PGGHG	protein-glucosylgalactosylhydroxylysine glucosidase [Source:HGNC Symbol;Acc:HGNC:26210]	80162	6735.41	-2.26743	0.490822	-4.61965	3.84391e-06	5.56957e-05	down-regulated
ENSG00000142408	CACNG8	calcium voltage-gated channel auxiliary subunit gamma 8 [Source:HGNC Symbol;Acc:HGNC:13628]	59283	278.418	4.08389	0.551939	7.39917	1.37042e-13	6.71329e-12	up-regulated
ENSG00000142609	CFAP74	cilia and flagella associated protein 74 [Source:HGNC Symbol;Acc:HGNC:29368]	85452	140.479	3.50534	0.84052	4.17045	3.04002e-05	0.000339123	up-regulated
ENSG00000142611	PRDM16	PR/SET domain 16 [Source:HGNC Symbol;Acc:HGNC:14000]	63976	195.553	3.30097	0.620799	5.3173	1.05318e-07	2.20944e-06	up-regulated
ENSG00000142632	ARHGEF19	Rho guanine nucleotide exchange factor 19 [Source:HGNC Symbol;Acc:HGNC:26604]	128272	2027.82	-2.27136	0.558881	-4.06411	4.82153e-05	0.000500278	down-regulated
ENSG00000142698	C1orf94	chromosome 1 open reading frame 94 [Source:HGNC Symbol;Acc:HGNC:28250]	84970	67.0117	4.51371	1.02121	4.41995	9.87227e-06	0.0001271	up-regulated
ENSG00000143107	FNDC7	fibronectin type III domain containing 7 [Source:HGNC Symbol;Acc:HGNC:26668]	163479	13.4573	3.65103	0.564667	6.46582	1.00754e-10	3.4786e-09	up-regulated
ENSG00000143195	ILDR2	immunoglobulin like domain containing receptor 2 [Source:HGNC Symbol;Acc:HGNC:18131]	387597	628.29	2.58973	0.615144	4.20996	2.55419e-05	0.000290645	up-regulated
ENSG00000143320	CRABP2	cellular retinoic acid binding protein 2 [Source:HGNC Symbol;Acc:HGNC:2339]	1382	3991.22	-2.30965	0.470518	-4.90874	9.16635e-07	1.54671e-05	down-regulated
ENSG00000143341	HMCN1	hemicentin 1 [Source:HGNC Symbol;Acc:HGNC:19194]	83872	1427.85	-2.86139	0.579776	-4.93534	8.00107e-07	1.37047e-05	down-regulated
ENSG00000143469	SYT14	synaptotagmin 14 [Source:HGNC Symbol;Acc:HGNC:23143]	255928	179.054	2.16399	0.409157	5.28891	1.23048e-07	2.54572e-06	up-regulated
ENSG00000143494	VASH2	vasohibin 2 [Source:HGNC Symbol;Acc:HGNC:25723]	79805	145.111	-2.17157	0.476491	-4.55742	5.17867e-06	7.22928e-05	down-regulated
ENSG00000143603	KCNN3	potassium calcium-activated channel subfamily N member 3 [Source:HGNC Symbol;Acc:HGNC:6292]	3782	1575.22	4.28505	0.269518	15.8989	6.44454e-57	7.30888e-54	up-regulated
ENSG00000143772	ITPKB	inositol-trisphosphate 3-kinase B [Source:HGNC Symbol;Acc:HGNC:6179]	3707	6431.98	2.18626	0.380143	5.75117	8.86292e-09	2.31475e-07	up-regulated
ENSG00000143867	OSR1	odd-skipped related transcription factor 1 [Source:HGNC Symbol;Acc:HGNC:8111]	130497	473.274	-3.10158	0.478413	-6.48307	8.98723e-11	3.13472e-09	down-regulated
ENSG00000144040	SFXN5	sideroflexin 5 [Source:HGNC Symbol;Acc:HGNC:16073]	94097	2196	2.3686	0.382378	6.19439	5.85128e-10	1.84646e-08	up-regulated
ENSG00000144119	C1QL2	complement C1q like 2 [Source:HGNC Symbol;Acc:HGNC:24181]	165257	21.7808	3.45665	0.837773	4.12599	3.69137e-05	0.00040056	up-regulated
ENSG00000144191	CNGA3	cyclic nucleotide gated channel subunit alpha 3 [Source:HGNC Symbol;Acc:HGNC:2150]	1261	264.91	5.51721	0.504368	10.9388	7.51517e-28	1.333e-25	up-regulated
ENSG00000144230	GPR17	G protein-coupled receptor 17 [Source:HGNC Symbol;Acc:HGNC:4471]	2840	327.426	4.94215	0.616902	8.01123	1.13563e-15	7.11925e-14	up-regulated
ENSG00000144278	GALNT13	polypeptide N-acetylgalactosaminyltransferase 13 [Source:HGNC Symbol;Acc:HGNC:23242]	114805	1057.87	7.06819	0.330578	21.3813	1.99463e-101	1.49302e-97	up-regulated
ENSG00000144285	SCN1A	sodium voltage-gated channel alpha subunit 1 [Source:HGNC Symbol;Acc:HGNC:10585]	6323	478.894	5.3742	0.751056	7.15552	8.33539e-13	3.67012e-11	up-regulated
ENSG00000144339	TMEFF2	transmembrane protein with EGF like and two follistatin like domains 2 [Source:HGNC Symbol;Acc:HGNC:11867]	23671	195.234	3.38804	0.790416	4.2864	1.81592e-05	0.000215685	up-regulated
ENSG00000144354	CDCA7	cell division cycle associated 7 [Source:HGNC Symbol;Acc:HGNC:14628]	83879	2129.49	-2.83765	0.709342	-4.00039	6.32371e-05	0.000628609	down-regulated
ENSG00000144366	GULP1	GULP PTB domain containing engulfment adaptor 1 [Source:HGNC Symbol;Acc:HGNC:18649]	51454	508.151	-2.53093	0.452225	-5.59662	2.1857e-08	5.31181e-07	down-regulated
ENSG00000144369	FAM171B	family with sequence similarity 171 member B [Source:HGNC Symbol;Acc:HGNC:29412]	165215	2720.07	2.99593	0.334948	8.94445	3.73809e-19	3.26873e-17	up-regulated
ENSG00000144406	UNC80	unc-80 homolog, NALCN channel complex subunit [Source:HGNC Symbol;Acc:HGNC:26582]	285175	503.781	2.65089	0.444009	5.97035	2.36746e-09	6.86326e-08	up-regulated
ENSG00000144481	TRPM8	transient receptor potential cation channel subfamily M member 8 [Source:HGNC Symbol;Acc:HGNC:17961]	79054	166.589	4.74341	0.656327	7.2272	4.93062e-13	2.2422e-11	up-regulated
ENSG00000144485	HES6	hes family bHLH transcription factor 6 [Source:HGNC Symbol;Acc:HGNC:18254]	55502	1138.31	3.49139	0.424191	8.23071	1.86101e-16	1.26637e-14	up-regulated
ENSG00000144488	ESPNL	espin like [Source:HGNC Symbol;Acc:HGNC:27937]	339768	85.4329	-2.39736	0.506526	-4.73294	2.21293e-06	3.40968e-05	down-regulated
ENSG00000144596	GRIP2	glutamate receptor interacting protein 2 [Source:HGNC Symbol;Acc:HGNC:23841]	80852	2962.35	-2.60584	0.629369	-4.14041	3.4669e-05	0.000379837	down-regulated
ENSG00000144619	CNTN4	contactin 4 [Source:HGNC Symbol;Acc:HGNC:2174]	152330	643.181	-2.35299	0.502634	-4.68131	2.85044e-06	4.28093e-05	down-regulated
ENSG00000144749	LRIG1	leucine rich repeats and immunoglobulin like domains 1 [Source:HGNC Symbol;Acc:HGNC:17360]	26018	4478.21	2.62135	0.301303	8.70005	3.31738e-18	2.68737e-16	up-regulated
ENSG00000144824	PHLDB2	pleckstrin homology like domain family B member 2 [Source:HGNC Symbol;Acc:HGNC:29573]	90102	1561.87	-2.14904	0.3784	-5.67928	1.35259e-08	3.41297e-07	down-regulated
ENSG00000144847	IGSF11	immunoglobulin superfamily member 11 [Source:HGNC Symbol;Acc:HGNC:16669]	152404	576.617	5.62937	0.512296	10.9885	4.33966e-28	7.7711e-26	up-regulated
ENSG00000144908	ALDH1L1	aldehyde dehydrogenase 1 family member L1 [Source:HGNC Symbol;Acc:HGNC:3978]	10840	1000.04	3.75082	0.676853	5.54156	2.99794e-08	7.08812e-07	up-regulated
ENSG00000144909	OSBPL11	oxysterol binding protein like 11 [Source:HGNC Symbol;Acc:HGNC:16397]	114885	2154.76	2.2892	0.471159	4.85865	1.18187e-06	1.94943e-05	up-regulated
ENSG00000145087	STXBP5L	syntaxin binding protein 5L [Source:HGNC Symbol;Acc:HGNC:30757]	9515	215.494	4.55164	0.606344	7.5067	6.06382e-14	3.10457e-12	up-regulated
ENSG00000145194	ECE2	endothelin converting enzyme 2 [Source:HGNC Symbol;Acc:HGNC:13275]	9718	807.502	3.13328	0.753507	4.15826	3.20679e-05	0.000355081	up-regulated
ENSG00000145284	SCD5	stearoyl-CoA desaturase 5 [Source:HGNC Symbol;Acc:HGNC:21088]	79966	9036.92	3.10687	0.39207	7.92425	2.2952e-15	1.37002e-13	up-regulated
ENSG00000145335	SNCA	synuclein alpha [Source:HGNC Symbol;Acc:HGNC:11138]	6622	1553.41	2.29561	0.353686	6.49052	8.55428e-11	2.99208e-09	up-regulated
ENSG00000145362	ANK2	ankyrin 2 [Source:HGNC Symbol;Acc:HGNC:493]	287	6608.95	4.5246	0.410084	11.0334	2.63824e-28	4.74706e-26	up-regulated
ENSG00000145491	ROPN1L	rhophilin associated tail protein 1 like [Source:HGNC Symbol;Acc:HGNC:24060]	83853	94.9831	5.33165	0.573443	9.29762	1.43631e-20	1.41461e-18	up-regulated
ENSG00000145703	IQGAP2	IQ motif containing GTPase activating protein 2 [Source:HGNC Symbol;Acc:HGNC:6111]	10788	2977.15	-2.15906	0.279808	-7.71621	1.19836e-14	6.60527e-13	down-regulated
ENSG00000145721	LIX1	limb and CNS expressed 1 [Source:HGNC Symbol;Acc:HGNC:18581]	167410	582.272	6.14177	0.526429	11.6668	1.88272e-31	4.1694e-29	up-regulated
ENSG00000145794	MEGF10	multiple EGF like domains 10 [Source:HGNC Symbol;Acc:HGNC:29634]	84466	873.648	4.42181	0.389757	11.3451	7.84663e-30	1.58739e-27	up-regulated
ENSG00000146005	PSD2	pleckstrin and Sec7 domain containing 2 [Source:HGNC Symbol;Acc:HGNC:19092]	84249	2459.42	7.54649	0.409021	18.4501	5.20298e-76	1.77024e-72	up-regulated
ENSG00000146038	DCDC2	doublecortin domain containing 2 [Source:HGNC Symbol;Acc:HGNC:18141]	51473	215.003	2.98049	0.493332	6.04154	1.52649e-09	4.57043e-08	up-regulated
ENSG00000146049	KAAG1	kidney associated antigen 1 [Source:HGNC Symbol;Acc:HGNC:21031]	353219	29.0536	3.18955	0.467065	6.82892	8.55564e-12	3.40642e-10	up-regulated
ENSG00000146090	RASGEF1C	RasGEF domain family member 1C [Source:HGNC Symbol;Acc:HGNC:27400]	255426	108.676	3.138	0.681529	4.60436	4.13737e-06	5.93504e-05	up-regulated
ENSG00000146122	DAAM2	dishevelled associated activator of morphogenesis 2 [Source:HGNC Symbol;Acc:HGNC:18143]	23500	4132.04	2.88098	0.499042	5.77303	7.7857e-09	2.05347e-07	up-regulated
ENSG00000146147	MLIP	muscular LMNA interacting protein [Source:HGNC Symbol;Acc:HGNC:21355]	90523	171.196	4.11894	0.530487	7.76444	8.20052e-15	4.62915e-13	up-regulated
ENSG00000146216	TTBK1	tau tubulin kinase 1 [Source:HGNC Symbol;Acc:HGNC:19140]	84630	484.874	4.38823	0.462638	9.48524	2.4183e-21	2.57856e-19	up-regulated
ENSG00000146352	CLVS2	clavesin 2 [Source:HGNC Symbol;Acc:HGNC:23046]	134829	57.822	4.06201	0.901606	4.5053	6.62784e-06	8.98095e-05	up-regulated
ENSG00000146966	DENND2A	DENN domain containing 2A [Source:HGNC Symbol;Acc:HGNC:22212]	27147	1238.43	2.73723	0.304828	8.97959	2.71782e-19	2.39334e-17	up-regulated
ENSG00000147027	TMEM47	transmembrane protein 47 [Source:HGNC Symbol;Acc:HGNC:18515]	83604	2125.74	3.61007	0.467716	7.71851	1.17696e-14	6.50646e-13	up-regulated
ENSG00000147127	RAB41	RAB41, member RAS oncogene family [Source:HGNC Symbol;Acc:HGNC:18293]	347517	65.0572	2.254	0.298371	7.55436	4.20923e-14	2.18798e-12	up-regulated
ENSG00000147231	RADX	RPA1 related single stranded DNA binding protein, X-linked [Source:HGNC Symbol;Acc:HGNC:25486]	55086	415.91	2.59531	0.264633	9.8072	1.04838e-22	1.22999e-20	up-regulated
ENSG00000147234	FRMPD3	FERM and PDZ domain containing 3 [Source:HGNC Symbol;Acc:HGNC:29382]	84443	669.054	4.8697	0.493566	9.86635	5.82456e-23	6.94236e-21	up-regulated
ENSG00000147246	HTR2C	5-hydroxytryptamine receptor 2C [Source:HGNC Symbol;Acc:HGNC:5295]	3358	40.4652	5.18112	0.894061	5.79504	6.83054e-09	1.8208e-07	up-regulated
ENSG00000147588	PMP2	peripheral myelin protein 2 [Source:HGNC Symbol;Acc:HGNC:9117]	5375	19413.5	8.75964	0.852993	10.2693	9.69054e-25	1.35328e-22	up-regulated
ENSG00000147642	SYBU	syntabulin [Source:HGNC Symbol;Acc:HGNC:26011]	55638	1854.51	2.78809	0.375832	7.41844	1.18509e-13	5.84365e-12	up-regulated
ENSG00000147724	FAM135B	family with sequence similarity 135 member B [Source:HGNC Symbol;Acc:HGNC:28029]	51059	393.449	5.79689	0.391048	14.824	1.02548e-49	8.16588e-47	up-regulated
ENSG00000148053	NTRK2	neurotrophic receptor tyrosine kinase 2 [Source:HGNC Symbol;Acc:HGNC:8032]	4915	22849.6	4.21971	0.545667	7.73312	1.04939e-14	5.85314e-13	up-regulated
ENSG00000148082	SHC3	SHC adaptor protein 3 [Source:HGNC Symbol;Acc:HGNC:18181]	53358	1322.65	2.33973	0.599231	3.90456	9.43964e-05	0.000882999	up-regulated
ENSG00000148204	CRB2	crumbs cell polarity complex component 2 [Source:HGNC Symbol;Acc:HGNC:18688]	286204	1994.04	4.03112	0.3182	12.6685	8.84063e-37	2.69e-34	up-regulated
ENSG00000148219	ASTN2	astrotactin 2 [Source:HGNC Symbol;Acc:HGNC:17021]	23245	2307.91	2.67085	0.506927	5.26871	1.37382e-07	2.79894e-06	up-regulated
ENSG00000148411	NACC2	NACC family member 2 [Source:HGNC Symbol;Acc:HGNC:23846]	138151	5961.8	3.31913	0.352992	9.40283	5.31143e-21	5.50653e-19	up-regulated
ENSG00000148482	SLC39A12	solute carrier family 39 member 12 [Source:HGNC Symbol;Acc:HGNC:20860]	221074	462.238	7.35288	0.588241	12.4998	7.48526e-36	2.20585e-33	up-regulated
ENSG00000148488	ST8SIA6	ST8 alpha-N-acetyl-neuraminide alpha-2,8-sialyltransferase 6 [Source:HGNC Symbol;Acc:HGNC:23317]	338596	1009.3	-2.82527	0.695378	-4.06293	4.84607e-05	0.000502268	down-regulated
ENSG00000148516	ZEB1	zinc finger E-box binding homeobox 1 [Source:HGNC Symbol;Acc:HGNC:11642]	6935	3388.19	2.30046	0.438261	5.24906	1.52878e-07	3.07945e-06	up-regulated
ENSG00000148541	FAM13C	family with sequence similarity 13 member C [Source:HGNC Symbol;Acc:HGNC:19371]	220965	948.514	2.32235	0.262649	8.84204	9.39897e-19	7.92265e-17	up-regulated
ENSG00000148704	VAX1	ventral anterior homeobox 1 [Source:HGNC Symbol;Acc:HGNC:12660]	11023	88.2366	4.97087	1.09895	4.52329	6.08864e-06	8.33175e-05	up-regulated
ENSG00000148948	LRRC4C	leucine rich repeat containing 4C [Source:HGNC Symbol;Acc:HGNC:29317]	57689	510.397	3.55675	0.285954	12.4382	1.62151e-35	4.6682e-33	up-regulated
ENSG00000149090	PAMR1	peptidase domain containing associated with muscle regeneration 1 [Source:HGNC Symbol;Acc:HGNC:24554]	25891	1514.32	2.76769	0.586934	4.7155	2.41118e-06	3.6818e-05	up-regulated
ENSG00000149201	CCDC81	coiled-coil domain containing 81 [Source:HGNC Symbol;Acc:HGNC:26281]	60494	169.684	3.45902	0.302659	11.4288	3.00314e-30	6.14184e-28	up-regulated
ENSG00000149260	CAPN5	calpain 5 [Source:HGNC Symbol;Acc:HGNC:1482]	726	1355.38	2.48428	0.353132	7.03499	1.99278e-12	8.41781e-11	up-regulated
ENSG00000149294	NCAM1	neural cell adhesion molecule 1 [Source:HGNC Symbol;Acc:HGNC:7656]	4684	6144.96	4.16085	0.425482	9.77915	1.38374e-22	1.60334e-20	up-regulated
ENSG00000149485	FADS1	fatty acid desaturase 1 [Source:HGNC Symbol;Acc:HGNC:3574]	3992	4302.66	2.61651	0.303338	8.62573	6.36831e-18	5.01769e-16	up-regulated
ENSG00000149489	ROM1	retinal outer segment membrane protein 1 [Source:HGNC Symbol;Acc:HGNC:10254]	6094	927.939	2.47946	0.230238	10.7691	4.81492e-27	7.90364e-25	up-regulated
ENSG00000149557	FEZ1	fasciculation and elongation protein zeta 1 [Source:HGNC Symbol;Acc:HGNC:3659]	9638	5183.21	4.94205	0.431674	11.4486	2.39082e-30	4.91643e-28	up-regulated
ENSG00000149557	FEZ1	fasciculation and elongation protein zeta 1 [Source:HGNC Symbol;Acc:HGNC:3659]	105369550	5183.21	4.94205	0.431674	11.4486	2.39082e-30	4.91643e-28	up-regulated
ENSG00000149735	GPHA2	glycoprotein hormone subunit alpha 2 [Source:HGNC Symbol;Acc:HGNC:18054]	170589	33.2177	-4.31808	0.983988	-4.38835	1.14216e-05	0.000143831	down-regulated
ENSG00000149948	HMGA2	high mobility group AT-hook 2 [Source:HGNC Symbol;Acc:HGNC:5009]	8091	248.628	-2.36991	0.604327	-3.92158	8.7972e-05	0.000831214	down-regulated
ENSG00000149970	CNKSR2	connector enhancer of kinase suppressor of Ras 2 [Source:HGNC Symbol;Acc:HGNC:19701]	22866	452.409	3.93421	0.352537	11.1597	6.41954e-29	1.22581e-26	up-regulated
ENSG00000149972	CNTN5	contactin 5 [Source:HGNC Symbol;Acc:HGNC:2175]	53942	40.1937	3.67118	0.507827	7.22919	4.85891e-13	2.21228e-11	up-regulated
ENSG00000150471	ADGRL3	adhesion G protein-coupled receptor L3 [Source:HGNC Symbol;Acc:HGNC:20974]	23284	1994.67	2.54724	0.576642	4.41737	9.99111e-06	0.000128453	up-regulated
ENSG00000150551	LYPD1	LY6/PLAUR domain containing 1 [Source:HGNC Symbol;Acc:HGNC:28431]	116372	1618.19	2.00543	0.502747	3.98894	6.63699e-05	0.000655053	up-regulated
ENSG00000150625	GPM6A	glycoprotein M6A [Source:HGNC Symbol;Acc:HGNC:4460]	2823	5518.42	7.24383	0.631746	11.4664	1.94684e-30	4.02555e-28	up-regulated
ENSG00000150627	WDR17	WD repeat domain 17 [Source:HGNC Symbol;Acc:HGNC:16661]	116966	346.636	2.30218	0.45257	5.08691	3.6394e-07	6.74297e-06	up-regulated
ENSG00000150656	CNDP1	carnosine dipeptidase 1 [Source:HGNC Symbol;Acc:HGNC:20675]	84735	112.224	4.58742	0.791553	5.79547	6.81284e-09	1.81959e-07	up-regulated
ENSG00000150722	PPP1R1C	protein phosphatase 1 regulatory inhibitor subunit 1C [Source:HGNC Symbol;Acc:HGNC:14940]	151242	105.217	2.73075	0.600513	4.54737	5.43209e-06	7.52274e-05	up-regulated
ENSG00000150873	C2orf50	chromosome 2 open reading frame 50 [Source:HGNC Symbol;Acc:HGNC:26324]	130813	378.981	4.05504	0.520196	7.79521	6.42999e-15	3.69093e-13	up-regulated
ENSG00000151012	SLC7A11	solute carrier family 7 member 11 [Source:HGNC Symbol;Acc:HGNC:11059]	23657	3340.7	2.56026	0.589082	4.34618	1.38528e-05	0.000170041	up-regulated
ENSG00000151023	ENKUR	enkurin, TRPC channel interacting protein [Source:HGNC Symbol;Acc:HGNC:28388]	219670	762.677	5.58863	0.39132	14.2815	2.85435e-46	1.87415e-43	up-regulated
ENSG00000151025	GPR158	G protein-coupled receptor 158 [Source:HGNC Symbol;Acc:HGNC:23689]	57512	647.447	4.50537	0.594605	7.57708	3.53414e-14	1.85771e-12	up-regulated
ENSG00000151079	KCNA6	potassium voltage-gated channel subfamily A member 6 [Source:HGNC Symbol;Acc:HGNC:6225]	3742	978.48	4.4543	0.653135	6.81988	9.11172e-12	3.62012e-10	up-regulated
ENSG00000151320	AKAP6	A-kinase anchoring protein 6 [Source:HGNC Symbol;Acc:HGNC:376]	9472	1406.36	3.17854	0.17701	17.9568	4.24625e-72	1.13514e-68	up-regulated
ENSG00000151322	NPAS3	neuronal PAS domain protein 3 [Source:HGNC Symbol;Acc:HGNC:19311]	64067	1381.16	4.62408	0.630485	7.33417	2.23092e-13	1.06907e-11	up-regulated
ENSG00000151778	SERP2	stress associated endoplasmic reticulum protein family member 2 [Source:HGNC Symbol;Acc:HGNC:20607]	387923	225.319	2.14382	0.503355	4.25907	2.05275e-05	0.000240533	up-regulated
ENSG00000151834	GABRA2	gamma-aminobutyric acid type A receptor subunit alpha2 [Source:HGNC Symbol;Acc:HGNC:4076]	2555	325.761	4.03252	1.03352	3.90173	9.55061e-05	0.000891596	up-regulated
ENSG00000151967	SCHIP1	schwannomin interacting protein 1 [Source:HGNC Symbol;Acc:HGNC:15678]	29970	1417.33	2.25497	0.421512	5.34972	8.80907e-08	1.8741e-06	up-regulated
ENSG00000152076	CCDC74B	coiled-coil domain containing 74B [Source:HGNC Symbol;Acc:HGNC:25267]	91409	358.622	2.84155	0.475132	5.98055	2.22381e-09	6.48702e-08	up-regulated
ENSG00000152078	TLCD4	TLC domain containing 4 [Source:HGNC Symbol;Acc:HGNC:26477]	148534	522.029	2.73316	0.418171	6.53598	6.31923e-11	2.2375e-09	up-regulated
ENSG00000152092	ASTN1	astrotactin 1 [Source:HGNC Symbol;Acc:HGNC:773]	460	1891.66	6.06889	0.371039	16.3565	3.90955e-60	5.04548e-57	up-regulated
ENSG00000152128	TMEM163	transmembrane protein 163 [Source:HGNC Symbol;Acc:HGNC:25380]	81615	760.381	3.11524	0.460195	6.76939	1.2933e-11	5.03674e-10	up-regulated
ENSG00000152137	HSPB8	heat shock protein family B (small) member 8 [Source:HGNC Symbol;Acc:HGNC:30171]	26353	8665.67	3.78562	0.311489	12.1533	5.50989e-34	1.44205e-31	up-regulated
ENSG00000152207	CYSLTR2	cysteinyl leukotriene receptor 2 [Source:HGNC Symbol;Acc:HGNC:18274]	57105	292.95	2.5849	0.516291	5.00667	5.53787e-07	9.85077e-06	up-regulated
ENSG00000152208	GRID2	glutamate ionotropic receptor delta type subunit 2 [Source:HGNC Symbol;Acc:HGNC:4576]	2895	122.344	4.64975	0.54768	8.48991	2.068e-17	1.53261e-15	up-regulated
ENSG00000152214	RIT2	Ras like without CAAX 2 [Source:HGNC Symbol;Acc:HGNC:10017]	6014	114.668	7.55645	0.530085	14.2552	4.16279e-46	2.68615e-43	up-regulated
ENSG00000152402	GUCY1A2	guanylate cyclase 1 soluble subunit alpha 2 [Source:HGNC Symbol;Acc:HGNC:4684]	2977	704.902	2.99826	0.493159	6.07971	1.20402e-09	3.66356e-08	up-regulated
ENSG00000152583	SPARCL1	SPARC like 1 [Source:HGNC Symbol;Acc:HGNC:11220]	8404	21842.2	2.81274	0.534159	5.26574	1.39629e-07	2.84317e-06	up-regulated
ENSG00000152611	CAPSL	calcyphosine like [Source:HGNC Symbol;Acc:HGNC:28375]	133690	191.712	5.1341	0.482837	10.6332	2.08857e-26	3.23003e-24	up-regulated
ENSG00000152760	DYNLT5	dynein light chain Tctex-type family member 5 [Source:HGNC Symbol;Acc:HGNC:26882]	200132	837.576	6.05665	0.592979	10.2139	1.71739e-24	2.3458e-22	up-regulated
ENSG00000152763	DNAI4	dynein axonemal intermediate chain 4 [Source:HGNC Symbol;Acc:HGNC:26252]	79819	522.792	2.75188	0.355577	7.7392	1.00044e-14	5.59679e-13	up-regulated
ENSG00000152910	CNTNAP4	contactin associated protein family member 4 [Source:HGNC Symbol;Acc:HGNC:18747]	85445	91.7806	3.97855	0.973134	4.08839	4.34381e-05	0.00045867	up-regulated
ENSG00000152931	PART1	prostate androgen-regulated transcript 1 [Source:HGNC Symbol;Acc:HGNC:17263]	25859	54.9527	2.61658	0.652311	4.01124	6.03998e-05	0.000604032	up-regulated
ENSG00000152936	LMNTD1	lamin tail domain containing 1 [Source:HGNC Symbol;Acc:HGNC:26683]	160492	47.1146	5.23086	0.765379	6.83434	8.23815e-12	3.2835e-10	up-regulated
ENSG00000152969	JAKMIP1	janus kinase and microtubule interacting protein 1 [Source:HGNC Symbol;Acc:HGNC:26460]	152789	333.14	3.31945	0.702109	4.72782	2.26941e-06	3.48093e-05	up-regulated
ENSG00000153253	SCN3A	sodium voltage-gated channel alpha subunit 3 [Source:HGNC Symbol;Acc:HGNC:10590]	6328	355.56	3.79954	0.540637	7.02789	2.09676e-12	8.83707e-11	up-regulated
ENSG00000153347	FAM81B	family with sequence similarity 81 member B [Source:HGNC Symbol;Acc:HGNC:26335]	153643	440.356	6.58914	0.563883	11.6853	1.51552e-31	3.39639e-29	up-regulated
ENSG00000153789	CIBAR2	CBY1 interacting BAR domain containing 2 [Source:HGNC Symbol;Acc:HGNC:24781]	339145	67.6673	3.13567	0.683374	4.58852	4.46406e-06	6.34772e-05	up-regulated
ENSG00000153822	KCNJ16	potassium inwardly rectifying channel subfamily J member 16 [Source:HGNC Symbol;Acc:HGNC:6262]	3773	1312.14	7.11897	0.578468	12.3066	8.34635e-35	2.34865e-32	up-regulated
ENSG00000153902	LGI4	leucine rich repeat LGI family member 4 [Source:HGNC Symbol;Acc:HGNC:18712]	163175	765.288	3.40193	0.6522	5.21608	1.82745e-07	3.62066e-06	up-regulated
ENSG00000153904	DDAH1	dimethylarginine dimethylaminohydrolase 1 [Source:HGNC Symbol;Acc:HGNC:2715]	23576	3362.52	3.33827	0.272321	12.2586	1.51066e-34	4.1572e-32	up-regulated
ENSG00000153930	ANKFN1	ankyrin repeat and fibronectin type III domain containing 1 [Source:HGNC Symbol;Acc:HGNC:26766]	162282	276.275	4.72352	0.720486	6.55602	5.52621e-11	1.98297e-09	up-regulated
ENSG00000154080	CHST9	carbohydrate sulfotransferase 9 [Source:HGNC Symbol;Acc:HGNC:19898]	83539	511.963	5.63401	0.696531	8.08867	6.03197e-16	3.89228e-14	up-regulated
ENSG00000154229	PRKCA	protein kinase C alpha [Source:HGNC Symbol;Acc:HGNC:9393]	5578	5216.48	2.51594	0.292897	8.58986	8.7075e-18	6.71931e-16	up-regulated
ENSG00000154277	UCHL1	ubiquitin C-terminal hydrolase L1 [Source:HGNC Symbol;Acc:HGNC:12513]	7345	3061.45	2.48158	0.545701	4.54751	5.4285e-06	7.52192e-05	up-regulated
ENSG00000154310	TNIK	TRAF2 and NCK interacting kinase [Source:HGNC Symbol;Acc:HGNC:30765]	23043	2415.43	3.28625	0.31768	10.3445	4.43166e-25	6.3792e-23	up-regulated
ENSG00000154316	TDH	L-threonine dehydrogenase (pseudogene) [Source:HGNC Symbol;Acc:HGNC:15547]	157739	76.1672	3.71454	0.399803	9.29092	1.52953e-20	1.49854e-18	up-regulated
ENSG00000154358	OBSCN	obscurin, cytoskeletal calmodulin and titin-interacting RhoGEF [Source:HGNC Symbol;Acc:HGNC:15719]	84033	2971.2	-2.15152	0.533345	-4.03401	5.48325e-05	0.000556796	down-regulated
ENSG00000154479	CFAP210	cilia and flagella associated protein 210 [Source:HGNC Symbol;Acc:HGNC:25064]	129881	359.861	3.29207	0.655133	5.02505	5.03312e-07	9.03737e-06	up-regulated
ENSG00000154493	C10orf90	chromosome 10 open reading frame 90 [Source:HGNC Symbol;Acc:HGNC:26563]	118611	90.7964	4.36847	0.514674	8.48784	2.10521e-17	1.55403e-15	up-regulated
ENSG00000154654	NCAM2	neural cell adhesion molecule 2 [Source:HGNC Symbol;Acc:HGNC:7657]	4685	1691.9	4.69212	0.553701	8.4741	2.36897e-17	1.73845e-15	up-regulated
ENSG00000154678	PDE1C	phosphodiesterase 1C [Source:HGNC Symbol;Acc:HGNC:8776]	5137	375.434	4.35718	0.316231	13.7785	3.43477e-43	1.81056e-40	up-regulated
ENSG00000154721	JAM2	junctional adhesion molecule 2 [Source:HGNC Symbol;Acc:HGNC:14686]	58494	3127.09	2.41795	0.512579	4.71722	2.39089e-06	3.65529e-05	up-regulated
ENSG00000154783	FGD5	FYVE, RhoGEF and PH domain containing 5 [Source:HGNC Symbol;Acc:HGNC:19117]	152273	1985.01	-2.12616	0.35538	-5.98277	2.1937e-09	6.40915e-08	down-regulated
ENSG00000154864	PIEZO2	piezo type mechanosensitive ion channel component 2 [Source:HGNC Symbol;Acc:HGNC:26270]	63895	686.477	-3.43929	0.42135	-8.16255	3.28021e-16	2.17669e-14	down-regulated
ENSG00000154917	RAB6B	RAB6B, member RAS oncogene family [Source:HGNC Symbol;Acc:HGNC:14902]	51560	1656.45	2.33797	0.354572	6.59378	4.28759e-11	1.56097e-09	up-regulated
ENSG00000154975	CA10	carbonic anhydrase 10 [Source:HGNC Symbol;Acc:HGNC:1369]	56934	321.857	4.76213	0.799466	5.95663	2.57486e-09	7.43572e-08	up-regulated
ENSG00000155016	CYP2U1	cytochrome P450 family 2 subfamily U member 1 [Source:HGNC Symbol;Acc:HGNC:20582]	113612	1364.29	2.42207	0.309692	7.82091	5.24426e-15	3.04297e-13	up-regulated
ENSG00000155052	CNTNAP5	contactin associated protein family member 5 [Source:HGNC Symbol;Acc:HGNC:18748]	129684	117.372	5.83389	0.725485	8.04136	8.88458e-16	5.6263e-14	up-regulated
ENSG00000155093	PTPRN2	protein tyrosine phosphatase receptor type N2 [Source:HGNC Symbol;Acc:HGNC:9677]	5799	1350.16	2.76597	0.374965	7.37662	1.62362e-13	7.89166e-12	up-regulated
ENSG00000155269	GPR78	G protein-coupled receptor 78 [Source:HGNC Symbol;Acc:HGNC:4528]	27201	1123.12	-2.73378	0.636901	-4.29231	1.76824e-05	0.000210759	down-regulated
ENSG00000155324	GRAMD2B	GRAM domain containing 2B [Source:HGNC Symbol;Acc:HGNC:24911]	65983	2927.06	2.00192	0.261411	7.65812	1.8867e-14	1.0204e-12	up-regulated
ENSG00000155511	GRIA1	glutamate ionotropic receptor AMPA type subunit 1 [Source:HGNC Symbol;Acc:HGNC:4571]	2890	4456.19	5.20676	0.709834	7.33518	2.21431e-13	1.06383e-11	up-regulated
ENSG00000155749	FLACC1	flagellum associated containing coiled-coil domains 1 [Source:HGNC Symbol;Acc:HGNC:14439]	130540	75.5903	2.69946	0.427996	6.3072	2.84133e-10	9.35409e-09	up-regulated
ENSG00000155816	FMN2	formin 2 [Source:HGNC Symbol;Acc:HGNC:14074]	56776	1450.25	5.81161	0.490814	11.8408	2.40292e-32	5.59604e-30	up-regulated
ENSG00000155886	SLC24A2	solute carrier family 24 member 2 [Source:HGNC Symbol;Acc:HGNC:10976]	25769	935.002	7.02804	0.474258	14.819	1.10373e-49	8.60587e-47	up-regulated
ENSG00000155897	ADCY8	adenylate cyclase 8 [Source:HGNC Symbol;Acc:HGNC:239]	114	1335.17	8.09216	0.570544	14.1832	1.1635e-45	7.25754e-43	up-regulated
ENSG00000155961	RAB39B	RAB39B, member RAS oncogene family [Source:HGNC Symbol;Acc:HGNC:16499]	116442	306.293	2.92545	0.416976	7.01588	2.28505e-12	9.59825e-11	up-regulated
ENSG00000155980	KIF5A	kinesin family member 5A [Source:HGNC Symbol;Acc:HGNC:6323]	3798	2684.91	2.73516	0.227911	12.001	3.50966e-33	8.75684e-31	up-regulated
ENSG00000156103	MMP16	matrix metallopeptidase 16 [Source:HGNC Symbol;Acc:HGNC:7162]	4325	624.883	3.02769	0.506302	5.98001	2.23128e-09	6.49866e-08	up-regulated
ENSG00000156206	CFAP161	cilia and flagella associated protein 161 [Source:HGNC Symbol;Acc:HGNC:26782]	161502	64.5586	4.63758	0.525626	8.82297	1.11467e-18	9.30761e-17	up-regulated
ENSG00000156265	MAP3K7CL	MAP3K7 C-terminal like [Source:HGNC Symbol;Acc:HGNC:16457]	56911	403.737	2.31469	0.330789	6.99748	2.60616e-12	1.08981e-10	up-regulated
ENSG00000156269	NAA11	N-alpha-acetyltransferase 11, NatA catalytic subunit [Source:HGNC Symbol;Acc:HGNC:28125]	84779	11.0865	3.67004	0.730344	5.02509	5.03202e-07	9.03737e-06	up-regulated
ENSG00000156395	SORCS3	sortilin related VPS10 domain containing receptor 3 [Source:HGNC Symbol;Acc:HGNC:16699]	22986	269.639	4.43041	0.609501	7.2689	3.62415e-13	1.69124e-11	up-regulated
ENSG00000156475	PPP2R2B	protein phosphatase 2 regulatory subunit Bbeta [Source:HGNC Symbol;Acc:HGNC:9305]	5521	1474.69	4.65899	0.454013	10.2618	1.04743e-24	1.4519e-22	up-regulated
ENSG00000157150	TIMP4	TIMP metallopeptidase inhibitor 4 [Source:HGNC Symbol;Acc:HGNC:11823]	7079	651.911	4.13178	0.646109	6.39486	1.60689e-10	5.4425e-09	up-regulated
ENSG00000157152	SYN2	synapsin II [Source:HGNC Symbol;Acc:HGNC:11495]	6854	396.715	2.52034	0.415167	6.07068	1.27373e-09	3.85685e-08	up-regulated
ENSG00000157330	CFAP107	cilia and flagella associated protein 107 [Source:HGNC Symbol;Acc:HGNC:28567]	93190	347.959	7.68402	0.534706	14.3706	7.91918e-47	5.38879e-44	up-regulated
ENSG00000157423	HYDIN	HYDIN axonemal central pair apparatus protein [Source:HGNC Symbol;Acc:HGNC:19368]	54768	599.465	5.3587	0.537886	9.96252	2.22343e-23	2.71942e-21	up-regulated
ENSG00000157551	KCNJ15	potassium inwardly rectifying channel subfamily J member 15 [Source:HGNC Symbol;Acc:HGNC:6261]	3772	1477.68	-2.52853	0.582957	-4.33743	1.4416e-05	0.000175915	down-regulated
ENSG00000157680	DGKI	diacylglycerol kinase iota [Source:HGNC Symbol;Acc:HGNC:2855]	9162	452.429	2.19903	0.420354	5.23138	1.68251e-07	3.35839e-06	up-regulated
ENSG00000157851	DPYSL5	dihydropyrimidinase like 5 [Source:HGNC Symbol;Acc:HGNC:20637]	56896	471.505	4.41012	0.544006	8.10675	5.19937e-16	3.3842e-14	up-regulated
ENSG00000157856	DRC1	dynein regulatory complex subunit 1 [Source:HGNC Symbol;Acc:HGNC:24245]	92749	405.241	5.99331	0.673124	8.90373	5.40018e-19	4.6784e-17	up-regulated
ENSG00000157890	MEGF11	multiple EGF like domains 11 [Source:HGNC Symbol;Acc:HGNC:29635]	84465	387.463	3.87514	0.673649	5.75247	8.79491e-09	2.3002e-07	up-regulated
ENSG00000157992	KRTCAP3	keratinocyte associated protein 3 [Source:HGNC Symbol;Acc:HGNC:28943]	200634	637.43	-2.09811	0.523062	-4.0112	6.04101e-05	0.000604032	down-regulated
ENSG00000158008	EXTL1	exostosin like glycosyltransferase 1 [Source:HGNC Symbol;Acc:HGNC:3515]	2134	758.992	3.83666	0.491236	7.81021	5.7091e-15	3.28216e-13	up-regulated
ENSG00000158023	CFAP251	cilia and flagella associated protein 251 [Source:HGNC Symbol;Acc:HGNC:28506]	144406	356.489	2.62681	0.480401	5.46795	4.55272e-08	1.02769e-06	up-regulated
ENSG00000158089	GALNT14	polypeptide N-acetylgalactosaminyltransferase 14 [Source:HGNC Symbol;Acc:HGNC:22946]	79623	360.374	-2.27795	0.468507	-4.86214	1.16121e-06	1.91875e-05	down-regulated
ENSG00000158113	LRRC43	leucine rich repeat containing 43 [Source:HGNC Symbol;Acc:HGNC:28562]	254050	145.933	2.83695	0.428304	6.62369	3.50346e-11	1.28929e-09	up-regulated
ENSG00000158186	MRAS	muscle RAS oncogene homolog [Source:HGNC Symbol;Acc:HGNC:7227]	22808	4506.61	2.15923	0.39912	5.40997	6.30346e-08	1.38854e-06	up-regulated
ENSG00000158423	RIBC1	RIB43A domain with coiled-coils 1 [Source:HGNC Symbol;Acc:HGNC:26537]	158787	340.704	2.93131	0.447693	6.54757	5.84791e-11	2.08244e-09	up-regulated
ENSG00000158428	CATIP	ciliogenesis associated TTC17 interacting protein [Source:HGNC Symbol;Acc:HGNC:25062]	375307	189.028	2.72943	0.449896	6.06681	1.30476e-09	3.94762e-08	up-regulated
ENSG00000158445	KCNB1	potassium voltage-gated channel subfamily B member 1 [Source:HGNC Symbol;Acc:HGNC:6231]	3745	1526.71	4.40743	0.439306	10.0327	1.0946e-23	1.39342e-21	up-regulated
ENSG00000158482	SNX29P1	sorting nexin 29 pseudogene 1 [Source:HGNC Symbol;Acc:HGNC:31913]	NA	7.71076	-2.87101	0.650365	-4.41446	1.01264e-05	0.000130014	down-regulated
ENSG00000158816	VWA5B1	von Willebrand factor A domain containing 5B1 [Source:HGNC Symbol;Acc:HGNC:26538]	127731	98.8249	2.71553	0.696952	3.89629	9.76756e-05	0.000909355	up-regulated
ENSG00000159251	ACTC1	actin alpha cardiac muscle 1 [Source:HGNC Symbol;Acc:HGNC:143]	70	85.2686	3.32048	0.783944	4.23561	2.27933e-05	0.000262723	up-regulated
ENSG00000159556	ISL2	ISL LIM homeobox 2 [Source:HGNC Symbol;Acc:HGNC:18524]	64843	445.426	-3.09816	0.794459	-3.8997	9.63106e-05	0.000897987	down-regulated
ENSG00000159625	DRC7	dynein regulatory complex subunit 7 [Source:HGNC Symbol;Acc:HGNC:25289]	84229	228.018	5.0004	0.534303	9.35873	8.07028e-21	8.27502e-19	up-regulated
ENSG00000159713	TPPP3	tubulin polymerization promoting protein family member 3 [Source:HGNC Symbol;Acc:HGNC:24162]	51673	3467.9	5.25193	0.490859	10.6995	1.02347e-26	1.65105e-24	up-regulated
ENSG00000159784	FAM131B	family with sequence similarity 131 member B [Source:HGNC Symbol;Acc:HGNC:22202]	9715	393.704	2.41234	0.354929	6.79668	1.07058e-11	4.231e-10	up-regulated
ENSG00000160188	RSPH1	radial spoke head component 1 [Source:HGNC Symbol;Acc:HGNC:12371]	89765	1011.03	4.05483	0.5476	7.40473	1.31415e-13	6.463e-12	up-regulated
ENSG00000160200	CBS	cystathionine beta-synthase [Source:HGNC Symbol;Acc:HGNC:1550]	875	67.9438	2.45085	0.357342	6.85856	6.95584e-12	2.79024e-10	up-regulated
ENSG00000160200	CBS	cystathionine beta-synthase [Source:HGNC Symbol;Acc:HGNC:1550]	102724560	67.9438	2.45085	0.357342	6.85856	6.95584e-12	2.79024e-10	up-regulated
ENSG00000160282	FTCD	formimidoyltransferase cyclodeaminase [Source:HGNC Symbol;Acc:HGNC:3974]	10841	33.6844	-2.31736	0.56652	-4.09052	4.30405e-05	0.000455295	down-regulated
ENSG00000160307	S100B	S100 calcium binding protein B [Source:HGNC Symbol;Acc:HGNC:10500]	6285	5490.33	5.50897	0.708366	7.77701	7.42578e-15	4.21726e-13	up-regulated
ENSG00000160539	PLPP7	phospholipid phosphatase 7 (inactive) [Source:HGNC Symbol;Acc:HGNC:28174]	84814	203.642	2.55891	0.490833	5.2134	1.85414e-07	3.66966e-06	up-regulated
ENSG00000160678	S100A1	S100 calcium binding protein A1 [Source:HGNC Symbol;Acc:HGNC:10486]	6271	699.354	3.16019	0.387333	8.15885	3.38237e-16	2.24051e-14	up-regulated
ENSG00000160781	PAQR6	progestin and adipoQ receptor family member 6 [Source:HGNC Symbol;Acc:HGNC:30132]	79957	3284.36	5.19412	0.271485	19.1322	1.36079e-81	5.0929e-78	up-regulated
ENSG00000160808	MYL3	myosin light chain 3 [Source:HGNC Symbol;Acc:HGNC:7584]	4634	79.7177	2.52869	0.451134	5.60517	2.0805e-08	5.08587e-07	up-regulated
ENSG00000160838	LRRC71	leucine rich repeat containing 71 [Source:HGNC Symbol;Acc:HGNC:26556]	149499	105.508	3.32825	0.579111	5.74718	9.07446e-09	2.36731e-07	up-regulated
ENSG00000160862	AZGP1	alpha-2-glycoprotein 1, zinc-binding [Source:HGNC Symbol;Acc:HGNC:910]	563	60.8242	3.87081	0.960048	4.03189	5.53304e-05	0.000560887	up-regulated
ENSG00000161509	GRIN2C	glutamate ionotropic receptor NMDA type subunit 2C [Source:HGNC Symbol;Acc:HGNC:4587]	2905	152.568	2.57803	0.633681	4.06834	4.73492e-05	0.000493069	up-regulated
ENSG00000161714	PLCD3	phospholipase C delta 3 [Source:HGNC Symbol;Acc:HGNC:9061]	113026	5281	2.18549	0.409594	5.33575	9.51517e-08	2.01536e-06	up-regulated
ENSG00000161798	AQP5	aquaporin 5 [Source:HGNC Symbol;Acc:HGNC:638]	362	51.3369	2.45052	0.55063	4.45038	8.57176e-06	0.000112367	up-regulated
ENSG00000162174	ASRGL1	asparaginase and isoaspartyl peptidase 1 [Source:HGNC Symbol;Acc:HGNC:16448]	80150	657.119	2.12641	0.532802	3.99099	6.5799e-05	0.000650104	up-regulated
ENSG00000162188	GNG3	G protein subunit gamma 3 [Source:HGNC Symbol;Acc:HGNC:4405]	2785	373.081	2.71911	0.368602	7.37681	1.62124e-13	7.8903e-12	up-regulated
ENSG00000162444	RBP7	retinol binding protein 7 [Source:HGNC Symbol;Acc:HGNC:30316]	116362	305.938	-2.25012	0.523017	-4.30218	1.69126e-05	0.00020281	down-regulated
ENSG00000162456	KNCN	kinocilin [Source:HGNC Symbol;Acc:HGNC:26488]	148930	24.4988	4.89889	1.02047	4.80061	1.58184e-06	2.53651e-05	up-regulated
ENSG00000162543	UBXN10	UBX domain protein 10 [Source:HGNC Symbol;Acc:HGNC:26354]	127733	1441.33	4.62007	0.451804	10.2258	1.51937e-24	2.08293e-22	up-regulated
ENSG00000162591	MEGF6	multiple EGF like domains 6 [Source:HGNC Symbol;Acc:HGNC:3232]	1953	3760.29	-2.44741	0.373711	-6.54895	5.79424e-11	2.06726e-09	down-regulated
ENSG00000162598	C1orf87	chromosome 1 open reading frame 87 [Source:HGNC Symbol;Acc:HGNC:28547]	127795	404.537	7.67597	0.595756	12.8844	5.50799e-38	1.92656e-35	up-regulated
ENSG00000162630	B3GALT2	beta-1,3-galactosyltransferase 2 [Source:HGNC Symbol;Acc:HGNC:917]	8707	102.976	2.58841	0.592583	4.36801	1.25385e-05	0.000155644	up-regulated
ENSG00000162631	NTNG1	netrin G1 [Source:HGNC Symbol;Acc:HGNC:23319]	22854	514.854	4.83868	0.51802	9.34071	9.56875e-21	9.73152e-19	up-regulated
ENSG00000162643	DNAI3	dynein axonemal intermediate chain 3 [Source:HGNC Symbol;Acc:HGNC:30711]	126820	160.395	2.36011	0.450758	5.23586	1.64217e-07	3.29367e-06	up-regulated
ENSG00000162670	BRINP3	BMP/retinoic acid inducible neural specific 3 [Source:HGNC Symbol;Acc:HGNC:22393]	339479	304.429	6.6112	0.390264	16.9403	2.2688e-64	4.24561e-61	up-regulated
ENSG00000162706	CADM3	cell adhesion molecule 3 [Source:HGNC Symbol;Acc:HGNC:17601]	57863	8800.69	6.00651	0.461876	13.0046	1.15229e-38	4.15827e-36	up-regulated
ENSG00000162728	KCNJ9	potassium inwardly rectifying channel subfamily J member 9 [Source:HGNC Symbol;Acc:HGNC:6270]	3765	1205.73	7.30006	0.62933	11.5997	4.13321e-31	8.83941e-29	up-regulated
ENSG00000162734	PEA15	proliferation and apoptosis adaptor protein 15 [Source:HGNC Symbol;Acc:HGNC:8822]	8682	18095.3	2.63576	0.410324	6.42361	1.33078e-10	4.54433e-09	up-regulated
ENSG00000162753	SLC9C2	solute carrier family 9 member C2 (putative) [Source:HGNC Symbol;Acc:HGNC:28664]	284525	29.2196	3.41394	0.706186	4.83434	1.33589e-06	2.18137e-05	up-regulated
ENSG00000162814	SPATA17	spermatogenesis associated 17 [Source:HGNC Symbol;Acc:HGNC:25184]	128153	188.806	3.25881	0.361672	9.0104	2.05309e-19	1.82083e-17	up-regulated
ENSG00000162873	KLHDC8A	kelch domain containing 8A [Source:HGNC Symbol;Acc:HGNC:25573]	55220	452.044	3.89971	0.497262	7.84236	4.4215e-15	2.58561e-13	up-regulated
ENSG00000162913	OBSCN-AS1	OBSCN antisense RNA 1 [Source:HGNC Symbol;Acc:HGNC:32047]	574407	123.24	-2.10449	0.495851	-4.2442	2.19372e-05	0.000254502	down-regulated
ENSG00000162944	RFTN2	raftlin family member 2 [Source:HGNC Symbol;Acc:HGNC:26402]	130132	864.881	2.87077	0.534553	5.37042	7.85548e-08	1.69745e-06	up-regulated
ENSG00000162949	CAPN13	calpain 13 [Source:HGNC Symbol;Acc:HGNC:16663]	92291	26.9359	-4.03675	0.999156	-4.04016	5.34143e-05	0.000544413	down-regulated
ENSG00000163075	CFAP221	cilia and flagella associated protein 221 [Source:HGNC Symbol;Acc:HGNC:33720]	200373	191.08	3.80291	0.413526	9.19631	3.70463e-20	3.48951e-18	up-regulated
ENSG00000163263	CFAP141	cilia and flagella associated protein 141 [Source:HGNC Symbol;Acc:HGNC:32305]	388701	9.55543	2.72292	0.534467	5.09465	3.49383e-07	6.50548e-06	up-regulated
ENSG00000163285	GABRG1	gamma-aminobutyric acid type A receptor subunit gamma1 [Source:HGNC Symbol;Acc:HGNC:4086]	2565	1918.99	5.43784	0.95915	5.66943	1.43271e-08	3.5987e-07	up-regulated
ENSG00000163288	GABRB1	gamma-aminobutyric acid type A receptor subunit beta1 [Source:HGNC Symbol;Acc:HGNC:4081]	2560	90.6834	3.92551	0.546954	7.17703	7.12405e-13	3.16281e-11	up-regulated
ENSG00000163359	COL6A3	collagen type VI alpha 3 chain [Source:HGNC Symbol;Acc:HGNC:2213]	1293	15506.6	-3.52516	0.847635	-4.15881	3.19905e-05	0.000354433	down-regulated
ENSG00000163406	SLC15A2	solute carrier family 15 member 2 [Source:HGNC Symbol;Acc:HGNC:10921]	6565	1128.77	2.6431	0.395272	6.68679	2.28119e-11	8.55467e-10	up-regulated
ENSG00000163431	LMOD1	leiomodin 1 [Source:HGNC Symbol;Acc:HGNC:6647]	25802	1487.39	2.36039	0.57612	4.09704	4.18458e-05	0.000445174	up-regulated
ENSG00000163485	ADORA1	adenosine A1 receptor [Source:HGNC Symbol;Acc:HGNC:262]	134	914.484	4.47148	0.451069	9.91307	3.65261e-23	4.38149e-21	up-regulated
ENSG00000163531	NFASC	neurofascin [Source:HGNC Symbol;Acc:HGNC:29866]	23114	3688.53	4.58606	0.481145	9.53157	1.54925e-21	1.68065e-19	up-regulated
ENSG00000163576	EFHB	EF-hand domain family member B [Source:HGNC Symbol;Acc:HGNC:26330]	151651	119.293	2.25058	0.397401	5.66325	1.48534e-08	3.72092e-07	up-regulated
ENSG00000163618	CADPS	calcium dependent secretion activator [Source:HGNC Symbol;Acc:HGNC:1426]	8618	451.267	2.0231	0.515325	3.92588	8.64138e-05	0.000818558	up-regulated
ENSG00000163687	DNASE1L3	deoxyribonuclease 1 like 3 [Source:HGNC Symbol;Acc:HGNC:2959]	1776	163.156	-3.38087	0.829284	-4.07685	4.565e-05	0.000478035	down-regulated
ENSG00000163734	CXCL3	C-X-C motif chemokine ligand 3 [Source:HGNC Symbol;Acc:HGNC:4604]	2921	102.709	-2.32877	0.472981	-4.92359	8.49712e-07	1.44947e-05	down-regulated
ENSG00000163755	HPS3	HPS3 biogenesis of lysosomal organelles complex 2 subunit 1 [Source:HGNC Symbol;Acc:HGNC:15597]	84343	2966.67	2.06348	0.420161	4.91118	9.05321e-07	1.52941e-05	up-regulated
ENSG00000163827	LRRC2	leucine rich repeat containing 2 [Source:HGNC Symbol;Acc:HGNC:14676]	79442	519.973	4.79368	0.521464	9.19273	3.82982e-20	3.58337e-18	up-regulated
ENSG00000163873	GRIK3	glutamate ionotropic receptor kainate type subunit 3 [Source:HGNC Symbol;Acc:HGNC:4581]	2899	1033.77	3.5974	0.725912	4.9557	7.20718e-07	1.24647e-05	up-regulated
ENSG00000163879	DNALI1	dynein axonemal light intermediate chain 1 [Source:HGNC Symbol;Acc:HGNC:14353]	7802	1657.31	3.68867	0.486622	7.58016	3.45137e-14	1.81675e-12	up-regulated
ENSG00000163884	KLF15	Kruppel like factor 15 [Source:HGNC Symbol;Acc:HGNC:14536]	28999	1386.46	2.4499	0.527987	4.64007	3.48283e-06	5.1117e-05	up-regulated
ENSG00000163885	CFAP100	cilia and flagella associated protein 100 [Source:HGNC Symbol;Acc:HGNC:26842]	348807	174.808	5.04436	0.695759	7.25015	4.16295e-13	1.91875e-11	up-regulated
ENSG00000163888	CAMK2N2	calcium/calmodulin dependent protein kinase II inhibitor 2 [Source:HGNC Symbol;Acc:HGNC:24197]	94032	111.145	2.18003	0.527699	4.13119	3.60894e-05	0.00039264	up-regulated
ENSG00000164056	SPRY1	sprouty RTK signaling antagonist 1 [Source:HGNC Symbol;Acc:HGNC:11269]	10252	2072.26	-2.06303	0.367445	-5.61453	1.97098e-08	4.85302e-07	down-regulated
ENSG00000164076	CAMKV	CaM kinase like vesicle associated [Source:HGNC Symbol;Acc:HGNC:28788]	79012	64.3101	3.64633	0.724888	5.0302	4.89958e-07	8.82443e-06	up-regulated
ENSG00000164089	ETNPPL	ethanolamine-phosphate phospho-lyase [Source:HGNC Symbol;Acc:HGNC:14404]	64850	758.728	7.11198	0.668274	10.6423	1.89355e-26	2.94059e-24	up-regulated
ENSG00000164106	SCRG1	stimulator of chondrogenesis 1 [Source:HGNC Symbol;Acc:HGNC:17036]	11341	1657.41	6.55677	0.468259	14.0025	1.50584e-44	8.53904e-42	up-regulated
ENSG00000164185	ZNF474	zinc finger protein 474 [Source:HGNC Symbol;Acc:HGNC:23245]	133923	46.9802	3.63734	0.444701	8.1793	2.85495e-16	1.9183e-14	up-regulated
ENSG00000164185	ZNF474	zinc finger protein 474 [Source:HGNC Symbol;Acc:HGNC:23245]	100505841	46.9802	3.63734	0.444701	8.1793	2.85495e-16	1.9183e-14	up-regulated
ENSG00000164197	RNF180	ring finger protein 180 [Source:HGNC Symbol;Acc:HGNC:27752]	285671	642.868	2.65447	0.314015	8.45333	2.83118e-17	2.05747e-15	up-regulated
ENSG00000164292	RHOBTB3	Rho related BTB domain containing 3 [Source:HGNC Symbol;Acc:HGNC:18757]	22836	3134.75	2.22581	0.468533	4.75058	2.02831e-06	3.14856e-05	up-regulated
ENSG00000164309	CMYA5	cardiomyopathy associated 5 [Source:HGNC Symbol;Acc:HGNC:14305]	202333	718.3	3.43459	0.368124	9.32998	1.05888e-20	1.07107e-18	up-regulated
ENSG00000164326	CARTPT	CART prepropeptide [Source:HGNC Symbol;Acc:HGNC:24323]	9607	183.188	5.79357	1.44408	4.01195	6.02196e-05	0.000602776	up-regulated
ENSG00000164398	ACSL6	acyl-CoA synthetase long chain family member 6 [Source:HGNC Symbol;Acc:HGNC:16496]	23305	513.406	4.49628	0.352321	12.7619	2.67622e-37	8.786e-35	up-regulated
ENSG00000164418	GRIK2	glutamate ionotropic receptor kainate type subunit 2 [Source:HGNC Symbol;Acc:HGNC:4580]	2898	420.096	3.09555	0.621793	4.97842	6.41064e-07	1.12377e-05	up-regulated
ENSG00000164434	FABP7	fatty acid binding protein 7 [Source:HGNC Symbol;Acc:HGNC:3562]	2173	1728.2	7.09557	0.698679	10.1557	3.12582e-24	4.14847e-22	up-regulated
ENSG00000164588	HCN1	hyperpolarization activated cyclic nucleotide gated potassium channel 1 [Source:HGNC Symbol;Acc:HGNC:4845]	348980	64.257	3.72296	0.79214	4.69988	2.60315e-06	3.95556e-05	up-regulated
ENSG00000164627	KIF6	kinesin family member 6 [Source:HGNC Symbol;Acc:HGNC:21202]	221458	168.43	3.5277	0.461716	7.6404	2.16542e-14	1.16274e-12	up-regulated
ENSG00000164675	IQUB	IQ motif and ubiquitin domain containing [Source:HGNC Symbol;Acc:HGNC:21995]	154865	57.6608	2.19227	0.474663	4.61857	3.86387e-06	5.58828e-05	up-regulated
ENSG00000164707	SLC13A4	solute carrier family 13 member 4 [Source:HGNC Symbol;Acc:HGNC:15827]	26266	452.562	-2.76105	0.671461	-4.11201	3.92231e-05	0.000421886	down-regulated
ENSG00000164708	PGAM2	phosphoglycerate mutase 2 [Source:HGNC Symbol;Acc:HGNC:8889]	5224	916.592	2.9706	0.312131	9.51716	1.77974e-21	1.9251e-19	up-regulated
ENSG00000164746	C7orf57	chromosome 7 open reading frame 57 [Source:HGNC Symbol;Acc:HGNC:22247]	136288	333.45	6.46486	0.430076	15.0319	4.53709e-51	3.85921e-48	up-regulated
ENSG00000164776	PHKG1	phosphorylase kinase catalytic subunit gamma 1 [Source:HGNC Symbol;Acc:HGNC:8930]	5260	2527.38	2.1489	0.281789	7.62592	2.423e-14	1.29178e-12	up-regulated
ENSG00000164796	CSMD3	CUB and Sushi multiple domains 3 [Source:HGNC Symbol;Acc:HGNC:19291]	114788	248.584	4.9442	0.566805	8.72293	2.71082e-18	2.20555e-16	up-regulated
ENSG00000164816	DEFA5	defensin alpha 5 [Source:HGNC Symbol;Acc:HGNC:2764]	1670	322.129	-5.82633	1.21812	-4.78307	1.72638e-06	2.72969e-05	down-regulated
ENSG00000164841	TMEM74	transmembrane protein 74 [Source:HGNC Symbol;Acc:HGNC:26409]	157753	90.7686	2.89445	0.651137	4.44522	8.78024e-06	0.000114618	up-regulated
ENSG00000164920	OSR2	odd-skipped related transciption factor 2 [Source:HGNC Symbol;Acc:HGNC:15830]	116039	63.4173	-2.89627	0.726893	-3.98446	6.7634e-05	0.000665424	down-regulated
ENSG00000164929	BAALC	BAALC binder of MAP3K1 and KLF4 [Source:HGNC Symbol;Acc:HGNC:14333]	79870	5607.45	5.7616	0.539376	10.682	1.23615e-26	1.9771e-24	up-regulated
ENSG00000164972	C9orf24	chromosome 9 open reading frame 24 [Source:HGNC Symbol;Acc:HGNC:19919]	84688	114.453	3.60071	0.643237	5.5978	2.17091e-08	5.28274e-07	up-regulated
ENSG00000165023	DIRAS2	DIRAS family GTPase 2 [Source:HGNC Symbol;Acc:HGNC:19323]	54769	174.3	2.18277	0.501519	4.35231	1.34712e-05	0.000165973	up-regulated
ENSG00000165084	C8orf34	chromosome 8 open reading frame 34 [Source:HGNC Symbol;Acc:HGNC:30905]	116328	629.179	4.2274	0.811522	5.20923	1.89629e-07	3.7412e-06	up-regulated
ENSG00000165091	TMC1	transmembrane channel like 1 [Source:HGNC Symbol;Acc:HGNC:16513]	117531	70.8289	2.76073	0.427702	6.45481	1.08353e-10	3.73064e-09	up-regulated
ENSG00000165164	CFAP47	cilia and flagella associated protein 47 [Source:HGNC Symbol;Acc:HGNC:26708]	286464	77.3485	3.87604	0.68718	5.6405	1.69554e-08	4.20526e-07	up-regulated
ENSG00000165186	PTCHD1	patched domain containing 1 [Source:HGNC Symbol;Acc:HGNC:26392]	139411	512.166	3.94891	0.372831	10.5917	3.25724e-26	4.99612e-24	up-regulated
ENSG00000165309	ARMC3	armadillo repeat containing 3 [Source:HGNC Symbol;Acc:HGNC:30964]	219681	666.844	8.00664	0.394735	20.2836	1.79527e-91	8.39872e-88	up-regulated
ENSG00000165379	LRFN5	leucine rich repeat and fibronectin type III domain containing 5 [Source:HGNC Symbol;Acc:HGNC:20360]	145581	192.901	2.4788	0.623905	3.97304	7.09605e-05	0.000693231	up-regulated
ENSG00000165383	LRRC18	leucine rich repeat containing 18 [Source:HGNC Symbol;Acc:HGNC:23199]	474354	22.8115	3.2014	0.736691	4.34565	1.38862e-05	0.000170339	up-regulated
ENSG00000165424	ZCCHC24	zinc finger CCHC-type containing 24 [Source:HGNC Symbol;Acc:HGNC:26911]	219654	5308.55	2.27626	0.515715	4.41378	1.0158e-05	0.000130375	up-regulated
ENSG00000165443	PHYHIPL	phytanoyl-CoA 2-hydroxylase interacting protein like [Source:HGNC Symbol;Acc:HGNC:29378]	84457	2275.57	4.44002	0.288373	15.3968	1.71987e-53	1.60919e-50	up-regulated
ENSG00000165478	HEPACAM	hepatic and glial cell adhesion molecule [Source:HGNC Symbol;Acc:HGNC:26361]	220296	4861.21	8.71768	0.680887	12.8034	1.56912e-37	5.24338e-35	up-regulated
ENSG00000165495	PKNOX2	PBX/knotted 1 homeobox 2 [Source:HGNC Symbol;Acc:HGNC:16714]	63876	450.558	2.93491	0.552741	5.30974	1.0978e-07	2.29533e-06	up-regulated
ENSG00000165566	AMER2	APC membrane recruitment protein 2 [Source:HGNC Symbol;Acc:HGNC:26360]	219287	594.542	6.08345	0.708156	8.59055	8.65555e-18	6.69303e-16	up-regulated
ENSG00000165731	RET	ret proto-oncogene [Source:HGNC Symbol;Acc:HGNC:9967]	5979	163.881	2.03572	0.474133	4.29356	1.75831e-05	0.000209775	up-regulated
ENSG00000165795	NDRG2	NDRG family member 2 [Source:HGNC Symbol;Acc:HGNC:14460]	57447	15162.2	3.54242	0.301414	11.7527	6.84081e-32	1.56112e-29	up-regulated
ENSG00000165821	SALL2	spalt like transcription factor 2 [Source:HGNC Symbol;Acc:HGNC:10526]	6297	2945.28	2.5393	0.516274	4.91851	8.72038e-07	1.48398e-05	up-regulated
ENSG00000165828	PRAP1	proline rich acidic protein 1 [Source:HGNC Symbol;Acc:HGNC:23304]	118471	24.2512	-2.18937	0.444416	-4.9264	8.37573e-07	1.43137e-05	down-regulated
ENSG00000165868	HSPA12A	heat shock protein family A (Hsp70) member 12A [Source:HGNC Symbol;Acc:HGNC:19022]	259217	1462.35	2.01881	0.26646	7.5764	3.55265e-14	1.86482e-12	up-regulated
ENSG00000165899	OTOGL	otogelin like [Source:HGNC Symbol;Acc:HGNC:26901]	283310	36.2357	2.13869	0.413647	5.17033	2.33681e-07	4.5151e-06	up-regulated
ENSG00000165996	HACD1	3-hydroxyacyl-CoA dehydratase 1 [Source:HGNC Symbol;Acc:HGNC:9639]	9200	415.968	-2.7334	0.589396	-4.63763	3.5242e-06	5.16028e-05	down-regulated
ENSG00000166091	CMTM5	CKLF like MARVEL transmembrane domain containing 5 [Source:HGNC Symbol;Acc:HGNC:19176]	116173	296.599	6.17533	0.654517	9.43494	3.91208e-21	4.10122e-19	up-regulated
ENSG00000166165	CKB	creatine kinase B [Source:HGNC Symbol;Acc:HGNC:1991]	1152	9724.29	3.25442	0.464751	7.0025	2.51428e-12	1.05257e-10	up-regulated
ENSG00000166246	DNAAF8	dynein axonemal assembly factor 8 [Source:HGNC Symbol;Acc:HGNC:25081]	146562	175.441	2.23987	0.35759	6.26378	3.7575e-10	1.21967e-08	up-regulated
ENSG00000166426	CRABP1	cellular retinoic acid binding protein 1 [Source:HGNC Symbol;Acc:HGNC:2338]	1381	2532.19	-4.04692	0.919749	-4.40003	1.08235e-05	0.000137595	down-regulated
ENSG00000166562	SEC11C	SEC11 homolog C, signal peptidase complex subunit [Source:HGNC Symbol;Acc:HGNC:23400]	90701	2627.92	2.47964	0.279468	8.87271	7.1389e-19	6.05852e-17	up-regulated
ENSG00000166578	IQCD	IQ motif containing D [Source:HGNC Symbol;Acc:HGNC:25168]	115811	251.489	2.47058	0.360469	6.85381	7.19098e-12	2.87839e-10	up-regulated
ENSG00000166596	CFAP52	cilia and flagella associated protein 52 [Source:HGNC Symbol;Acc:HGNC:16053]	146845	384.149	5.98735	0.507656	11.7941	4.18564e-32	9.61054e-30	up-regulated
ENSG00000166682	TMPRSS5	transmembrane serine protease 5 [Source:HGNC Symbol;Acc:HGNC:14908]	80975	291.893	3.56631	0.40478	8.8105	1.24594e-18	1.03623e-16	up-regulated
ENSG00000166707	ZCCHC18	zinc finger CCHC-type containing 18 [Source:HGNC Symbol;Acc:HGNC:32459]	644353	126.212	2.4342	0.453934	5.36246	8.20964e-08	1.76481e-06	up-regulated
ENSG00000166763	STRCP1	stereocilin pseudogene 1 [Source:HGNC Symbol;Acc:HGNC:33915]	554225	17.9167	-2.48472	0.630619	-3.94012	8.14402e-05	0.000778539	down-regulated
ENSG00000166819	PLIN1	perilipin 1 [Source:HGNC Symbol;Acc:HGNC:9076]	5346	183.912	3.59038	0.489528	7.33436	2.22776e-13	1.06892e-11	up-regulated
ENSG00000166897	ELFN2	extracellular leucine rich repeat and fibronectin type III domain containing 2 [Source:HGNC Symbol;Acc:HGNC:29396]	114794	173.595	3.29906	0.559734	5.89397	3.77029e-09	1.05698e-07	up-regulated
ENSG00000166924	NYAP1	neuronal tyrosine phosphorylated phosphoinositide-3-kinase adaptor 1 [Source:HGNC Symbol;Acc:HGNC:22009]	222950	674.957	2.20378	0.476582	4.62414	3.76151e-06	5.465e-05	up-regulated
ENSG00000166925	TSC22D4	TSC22 domain family member 4 [Source:HGNC Symbol;Acc:HGNC:21696]	81628	7388.14	2.58971	0.215004	12.0449	2.06277e-33	5.21631e-31	up-regulated
ENSG00000166963	MAP1A	microtubule associated protein 1A [Source:HGNC Symbol;Acc:HGNC:6835]	4130	6318.95	2.64495	0.338491	7.81394	5.5428e-15	3.19638e-13	up-regulated
ENSG00000167131	CCDC103	coiled-coil domain containing 103 [Source:HGNC Symbol;Acc:HGNC:32700]	388389	951.594	3.4783	0.196343	17.7155	3.18607e-70	7.01423e-67	up-regulated
ENSG00000167157	PRRX2	paired related homeobox 2 [Source:HGNC Symbol;Acc:HGNC:21338]	51450	212.095	-2.81376	0.49094	-5.73136	9.96267e-09	2.58394e-07	down-regulated
ENSG00000167191	GPRC5B	G protein-coupled receptor class C group 5 member B [Source:HGNC Symbol;Acc:HGNC:13308]	51704	13218.5	3.93483	0.457302	8.60445	7.66822e-18	5.95417e-16	up-regulated
ENSG00000167588	GPD1	glycerol-3-phosphate dehydrogenase 1 [Source:HGNC Symbol;Acc:HGNC:4455]	2819	471.027	4.457	0.593919	7.5044	6.17112e-14	3.1552e-12	up-regulated
ENSG00000167614	TTYH1	tweety family member 1 [Source:HGNC Symbol;Acc:HGNC:13476]	57348	3823.39	6.87447	0.533977	12.8741	6.29719e-38	2.18221e-35	up-regulated
ENSG00000167646	DNAAF3	dynein axonemal assembly factor 3 [Source:HGNC Symbol;Acc:HGNC:30492]	352909	180.308	2.72361	0.381318	7.14262	9.15712e-13	4.00367e-11	up-regulated
ENSG00000167654	ATCAY	ATCAY kinesin light chain interacting caytaxin [Source:HGNC Symbol;Acc:HGNC:779]	85300	440.901	3.60356	0.700496	5.1443	2.68523e-07	5.11437e-06	up-regulated
ENSG00000167701	GPT	glutamic--pyruvic transaminase [Source:HGNC Symbol;Acc:HGNC:4552]	2875	220.526	2.00519	0.373786	5.36453	8.11603e-08	1.7477e-06	up-regulated
ENSG00000167858	TEKT1	tektin 1 [Source:HGNC Symbol;Acc:HGNC:15534]	83659	504.605	7.72818	0.44074	17.5346	7.8039e-69	1.6226e-65	up-regulated
ENSG00000167912	TOX-DT	TOX divergent transcript [Source:HGNC Symbol;Acc:HGNC:55935]	100505501	189.706	2.53551	0.310088	8.17674	2.91624e-16	1.95247e-14	up-regulated
ENSG00000167972	ABCA3	ATP binding cassette subfamily A member 3 [Source:HGNC Symbol;Acc:HGNC:33]	21	1964.82	2.12236	0.290856	7.29695	2.94366e-13	1.38578e-11	up-regulated
ENSG00000168004	PLAAT5	phospholipase A and acyltransferase 5 [Source:HGNC Symbol;Acc:HGNC:24978]	117245	271.948	4.49436	0.50611	8.88022	6.67278e-19	5.72787e-17	up-regulated
ENSG00000168280	KIF5C	kinesin family member 5C [Source:HGNC Symbol;Acc:HGNC:6325]	3800	3203.81	2.52244	0.588412	4.28685	1.81223e-05	0.000215316	up-regulated
ENSG00000168309	FAM107A	family with sequence similarity 107 member A [Source:HGNC Symbol;Acc:HGNC:30827]	11170	14712	4.19658	0.589217	7.1223	1.06142e-12	4.61914e-11	up-regulated
ENSG00000168314	MOBP	myelin associated oligodendrocyte basic protein [Source:HGNC Symbol;Acc:HGNC:7189]	4336	208.493	6.17778	0.67034	9.21589	3.08704e-20	2.95488e-18	up-regulated
ENSG00000168329	CX3CR1	C-X3-C motif chemokine receptor 1 [Source:HGNC Symbol;Acc:HGNC:2558]	1524	1148.59	4.32477	0.603045	7.17156	7.41466e-13	3.28015e-11	up-regulated
ENSG00000168481	LGI3	leucine rich repeat LGI family member 3 [Source:HGNC Symbol;Acc:HGNC:18711]	203190	164.638	3.20974	0.618397	5.19041	2.09828e-07	4.08587e-06	up-regulated
ENSG00000168490	PHYHIP	phytanoyl-CoA 2-hydroxylase interacting protein [Source:HGNC Symbol;Acc:HGNC:16865]	9796	785.689	2.10669	0.453298	4.64747	3.36035e-06	4.95526e-05	up-regulated
ENSG00000168505	GBX2	gastrulation brain homeobox 2 [Source:HGNC Symbol;Acc:HGNC:4186]	2637	89.5251	3.46542	0.417432	8.30175	1.02587e-16	7.16309e-15	up-regulated
ENSG00000168546	GFRA2	GDNF family receptor alpha 2 [Source:HGNC Symbol;Acc:HGNC:4244]	2675	290.29	2.18511	0.454753	4.80505	1.5471e-06	2.49147e-05	up-regulated
ENSG00000168589	DYNLRB2	dynein light chain roadblock-type 2 [Source:HGNC Symbol;Acc:HGNC:15467]	83657	184.621	2.67173	0.533726	5.00581	5.56273e-07	9.89029e-06	up-regulated
ENSG00000168658	VWA3B	von Willebrand factor A domain containing 3B [Source:HGNC Symbol;Acc:HGNC:28385]	200403	287.515	5.35535	0.661823	8.09181	5.87862e-16	3.79988e-14	up-regulated
ENSG00000168702	LRP1B	LDL receptor related protein 1B [Source:HGNC Symbol;Acc:HGNC:6693]	53353	879.361	3.64677	0.661704	5.51118	3.56429e-08	8.25988e-07	up-regulated
ENSG00000168710	AHCYL1	adenosylhomocysteinase like 1 [Source:HGNC Symbol;Acc:HGNC:344]	10768	12792.1	2.7682	0.268701	10.3021	6.89104e-25	9.81978e-23	up-regulated
ENSG00000168843	FSTL5	follistatin like 5 [Source:HGNC Symbol;Acc:HGNC:21386]	56884	81.5665	4.56141	0.66043	6.90673	4.95946e-12	2.00446e-10	up-regulated
ENSG00000168874	ATOH8	atonal bHLH transcription factor 8 [Source:HGNC Symbol;Acc:HGNC:24126]	84913	1145.08	2.3268	0.368856	6.30815	2.82397e-10	9.31187e-09	up-regulated
ENSG00000168913	ENHO	energy homeostasis associated [Source:HGNC Symbol;Acc:HGNC:24838]	375704	1348.72	5.72191	0.448644	12.7538	2.96984e-37	9.58184e-35	up-regulated
ENSG00000168959	GRM5	glutamate metabotropic receptor 5 [Source:HGNC Symbol;Acc:HGNC:4597]	2915	188.106	4.79635	0.683104	7.0214	2.19661e-12	9.23712e-11	up-regulated
ENSG00000169006	NTSR2	neurotensin receptor 2 [Source:HGNC Symbol;Acc:HGNC:8040]	23620	219.938	7.21091	0.849395	8.48946	2.07593e-17	1.53545e-15	up-regulated
ENSG00000169064	ZBBX	zinc finger B-box domain containing [Source:HGNC Symbol;Acc:HGNC:26245]	79740	189.296	5.02871	0.759363	6.62227	3.53713e-11	1.29912e-09	up-regulated
ENSG00000169071	ROR2	receptor tyrosine kinase like orphan receptor 2 [Source:HGNC Symbol;Acc:HGNC:10257]	4920	1925.91	-2.54007	0.526003	-4.82899	1.37224e-06	2.23488e-05	down-regulated
ENSG00000169085	VXN	vexin [Source:HGNC Symbol;Acc:HGNC:28498]	254778	961.226	6.04158	0.370993	16.2849	1.26388e-59	1.57673e-56	up-regulated
ENSG00000169169	CPT1C	carnitine palmitoyltransferase 1C [Source:HGNC Symbol;Acc:HGNC:18540]	126129	450.448	2.03421	0.397051	5.12329	3.00251e-07	5.67822e-06	up-regulated
ENSG00000169181	GSG1L	GSG1 like [Source:HGNC Symbol;Acc:HGNC:28283]	146395	354.229	3.28137	0.708037	4.63446	3.57871e-06	5.22782e-05	up-regulated
ENSG00000169302	STK32A	serine/threonine kinase 32A [Source:HGNC Symbol;Acc:HGNC:28317]	202374	1312.05	5.26417	0.565173	9.31427	1.22795e-20	1.22553e-18	up-regulated
ENSG00000169313	P2RY12	purinergic receptor P2Y12 [Source:HGNC Symbol;Acc:HGNC:18124]	64805	554.061	3.99097	0.594769	6.71011	1.94473e-11	7.35185e-10	up-regulated
ENSG00000169397	RNASE3	ribonuclease A family member 3 [Source:HGNC Symbol;Acc:HGNC:10046]	6037	18.2142	2.41053	0.588395	4.0968	4.18909e-05	0.000445527	up-regulated
ENSG00000169432	SCN9A	sodium voltage-gated channel alpha subunit 9 [Source:HGNC Symbol;Acc:HGNC:10597]	6335	677.806	2.85808	0.56308	5.07579	3.85889e-07	7.09347e-06	up-regulated
ENSG00000169436	COL22A1	collagen type XXII alpha 1 chain [Source:HGNC Symbol;Acc:HGNC:22989]	169044	1027.46	2.46044	0.429635	5.72682	1.02331e-08	2.64681e-07	up-regulated
ENSG00000169760	NLGN1	neuroligin 1 [Source:HGNC Symbol;Acc:HGNC:14291]	22871	1009.7	3.08154	0.667959	4.61336	3.9621e-06	5.71869e-05	up-regulated
ENSG00000169860	P2RY1	purinergic receptor P2Y1 [Source:HGNC Symbol;Acc:HGNC:8539]	5028	734.355	2.14893	0.532578	4.03496	5.46123e-05	0.00055481	up-regulated
ENSG00000169862	CTNND2	catenin delta 2 [Source:HGNC Symbol;Acc:HGNC:2516]	1501	6013.77	7.49422	0.336066	22.2998	3.70866e-110	4.62668e-106	up-regulated
ENSG00000169885	CALML6	calmodulin like 6 [Source:HGNC Symbol;Acc:HGNC:24193]	163688	32.8828	-2.53032	0.552859	-4.57679	4.72169e-06	6.65589e-05	down-regulated
ENSG00000169902	TPST1	tyrosylprotein sulfotransferase 1 [Source:HGNC Symbol;Acc:HGNC:12020]	8460	2061.37	2.14369	0.359529	5.96249	2.48424e-09	7.1851e-08	up-regulated
ENSG00000170011	MYRIP	myosin VIIA and Rab interacting protein [Source:HGNC Symbol;Acc:HGNC:19156]	25924	548.979	3.57646	0.281917	12.6862	7.05062e-37	2.19897e-34	up-regulated
ENSG00000170075	GPR37L1	G protein-coupled receptor 37 like 1 [Source:HGNC Symbol;Acc:HGNC:14923]	9283	5023.02	4.94442	0.278877	17.7297	2.47175e-70	5.78172e-67	up-regulated
ENSG00000170091	NSG2	neuronal vesicle trafficking associated 2 [Source:HGNC Symbol;Acc:HGNC:24955]	51617	491.88	4.19623	0.729186	5.75468	8.68045e-09	2.27503e-07	up-regulated
ENSG00000170231	FABP6	fatty acid binding protein 6 [Source:HGNC Symbol;Acc:HGNC:3561]	2172	14.1643	3.46432	0.683136	5.07119	3.95326e-07	7.25623e-06	up-regulated
ENSG00000170298	LGALS9B	galectin 9B [Source:HGNC Symbol;Acc:HGNC:24842]	284194	203.769	-4.53486	0.971145	-4.6696	3.01789e-06	4.50888e-05	down-regulated
ENSG00000170324	FRMPD2	FERM and PDZ domain containing 2 [Source:HGNC Symbol;Acc:HGNC:28572]	143162	119.532	5.62269	0.727262	7.73131	1.06447e-14	5.91958e-13	up-regulated
ENSG00000170382	LRRN2	leucine rich repeat neuronal 2 [Source:HGNC Symbol;Acc:HGNC:16914]	10446	542.956	3.35093	0.532412	6.29387	3.0964e-10	1.01476e-08	up-regulated
ENSG00000170390	DCLK2	doublecortin like kinase 2 [Source:HGNC Symbol;Acc:HGNC:19002]	166614	3288.83	4.63175	0.350567	13.2122	7.46387e-40	3.10381e-37	up-regulated
ENSG00000170419	VSTM2A	V-set and transmembrane domain containing 2A [Source:HGNC Symbol;Acc:HGNC:28499]	222008	36.1897	5.38364	1.08061	4.98202	6.29225e-07	1.10405e-05	up-regulated
ENSG00000170439	METTL7B	methyltransferase like 7B [Source:HGNC Symbol;Acc:HGNC:28276]	196410	231.101	3.1206	0.59964	5.20413	1.9491e-07	3.83442e-06	up-regulated
ENSG00000170500	LONRF2	LON peptidase N-terminal domain and ring finger 2 [Source:HGNC Symbol;Acc:HGNC:24788]	164832	950.517	2.72147	0.478006	5.69339	1.24542e-08	3.17083e-07	up-regulated
ENSG00000170558	CDH2	cadherin 2 [Source:HGNC Symbol;Acc:HGNC:1759]	1000	2167.2	3.8547	0.402248	9.5829	9.43615e-22	1.03565e-19	up-regulated
ENSG00000170577	SIX2	SIX homeobox 2 [Source:HGNC Symbol;Acc:HGNC:10888]	10736	289.303	-3.46261	0.880578	-3.9322	8.41702e-05	0.000800751	down-regulated
ENSG00000170743	SYT9	synaptotagmin 9 [Source:HGNC Symbol;Acc:HGNC:19265]	143425	133.356	2.93725	0.476866	6.15949	7.29793e-10	2.28371e-08	up-regulated
ENSG00000171056	SOX7	SRY-box transcription factor 7 [Source:HGNC Symbol;Acc:HGNC:18196]	83595	626.583	-2.5081	0.50329	-4.98341	6.24726e-07	1.09718e-05	down-regulated
ENSG00000171130	ATP6V0E2	ATPase H+ transporting V0 subunit e2 [Source:HGNC Symbol;Acc:HGNC:21723]	155066	3167.72	2.51989	0.249087	10.1165	4.66767e-24	6.08683e-22	up-regulated
ENSG00000171368	TPPP	tubulin polymerization promoting protein [Source:HGNC Symbol;Acc:HGNC:24164]	11076	2476.75	3.68118	0.455208	8.08679	6.12579e-16	3.94602e-14	up-regulated
ENSG00000171385	KCND3	potassium voltage-gated channel subfamily D member 3 [Source:HGNC Symbol;Acc:HGNC:6239]	3752	686.209	2.15957	0.394021	5.48084	4.23301e-08	9.67183e-07	up-regulated
ENSG00000171388	APLN	apelin [Source:HGNC Symbol;Acc:HGNC:16665]	8862	1187.75	3.84096	0.52413	7.32826	2.33159e-13	1.11304e-11	up-regulated
ENSG00000171451	DSEL	dermatan sulfate epimerase like [Source:HGNC Symbol;Acc:HGNC:18144]	92126	730.355	2.54712	0.32387	7.86461	3.7024e-15	2.17871e-13	up-regulated
ENSG00000171462	DLK2	delta like non-canonical Notch ligand 2 [Source:HGNC Symbol;Acc:HGNC:21113]	65989	541.307	-2.8735	0.598075	-4.80458	1.55077e-06	2.49631e-05	down-regulated
ENSG00000171533	MAP6	microtubule associated protein 6 [Source:HGNC Symbol;Acc:HGNC:6868]	4135	1602.75	4.11801	0.541024	7.6115	2.70939e-14	1.43832e-12	up-regulated
ENSG00000171587	DSCAM	DS cell adhesion molecule [Source:HGNC Symbol;Acc:HGNC:3039]	1826	174.49	4.2591	0.628444	6.77722	1.22513e-11	4.78122e-10	up-regulated
ENSG00000171595	DNAI2	dynein axonemal intermediate chain 2 [Source:HGNC Symbol;Acc:HGNC:18744]	64446	36.6826	3.58221	0.740644	4.83661	1.32069e-06	2.15938e-05	up-regulated
ENSG00000171604	CXXC5	CXXC finger protein 5 [Source:HGNC Symbol;Acc:HGNC:26943]	51523	3086.27	2.09813	0.531045	3.95096	7.78395e-05	0.000748708	up-regulated
ENSG00000171714	ANO5	anoctamin 5 [Source:HGNC Symbol;Acc:HGNC:27337]	203859	299.569	2.22163	0.35132	6.32367	2.55424e-10	8.47475e-09	up-regulated
ENSG00000171714	ANO5	anoctamin 5 [Source:HGNC Symbol;Acc:HGNC:27337]	102723370	299.569	2.22163	0.35132	6.32367	2.55424e-10	8.47475e-09	up-regulated
ENSG00000171724	VAT1L	vesicle amine transport 1 like [Source:HGNC Symbol;Acc:HGNC:29315]	57687	1182.68	3.0296	0.465535	6.50778	7.62717e-11	2.67781e-09	up-regulated
ENSG00000171757	LRRC34	leucine rich repeat containing 34 [Source:HGNC Symbol;Acc:HGNC:28408]	151827	432.519	2.9234	0.249138	11.7341	8.52732e-32	1.9342e-29	up-regulated
ENSG00000171759	PAH	phenylalanine hydroxylase [Source:HGNC Symbol;Acc:HGNC:8582]	5053	146.417	4.4296	0.411359	10.7682	4.86346e-27	7.94847e-25	up-regulated
ENSG00000171766	GATM	glycine amidinotransferase [Source:HGNC Symbol;Acc:HGNC:4175]	2628	5418.66	2.77704	0.263203	10.5509	5.02879e-26	7.68194e-24	up-regulated
ENSG00000171798	KNDC1	kinase non-catalytic C-lobe domain containing 1 [Source:HGNC Symbol;Acc:HGNC:29374]	85442	1414.59	3.61443	0.517774	6.98071	2.93693e-12	1.22403e-10	up-regulated
ENSG00000171811	CFAP46	cilia and flagella associated protein 46 [Source:HGNC Symbol;Acc:HGNC:25247]	54777	357.395	3.3026	0.548397	6.02228	1.71979e-09	5.11237e-08	up-regulated
ENSG00000171877	FRMD5	FERM domain containing 5 [Source:HGNC Symbol;Acc:HGNC:28214]	84978	1110.49	4.52633	0.406647	11.1308	8.87862e-29	1.66146e-26	up-regulated
ENSG00000171885	AQP4	aquaporin 4 [Source:HGNC Symbol;Acc:HGNC:637]	361	33244.2	8.60476	0.803445	10.7098	9.15329e-27	1.48299e-24	up-regulated
ENSG00000171903	CYP4F11	cytochrome P450 family 4 subfamily F member 11 [Source:HGNC Symbol;Acc:HGNC:13265]	57834	318.069	4.96648	0.834417	5.95203	2.64829e-09	7.61837e-08	up-regulated
ENSG00000171916	LGALS9C	galectin 9C [Source:HGNC Symbol;Acc:HGNC:33874]	654346	115.61	-2.83437	0.705784	-4.01591	5.92169e-05	0.000594541	down-regulated
ENSG00000172005	MAL	mal, T cell differentiation protein [Source:HGNC Symbol;Acc:HGNC:6817]	4118	205.028	2.82404	0.652386	4.32878	1.49937e-05	0.000182133	up-regulated
ENSG00000172020	GAP43	growth associated protein 43 [Source:HGNC Symbol;Acc:HGNC:4140]	2596	4355.6	4.27552	0.567296	7.53667	4.82115e-14	2.48193e-12	up-regulated
ENSG00000172137	CALB2	calbindin 2 [Source:HGNC Symbol;Acc:HGNC:1435]	794	732.505	3.94851	0.555263	7.11106	1.15157e-12	4.96527e-11	up-regulated
ENSG00000172159	FRMD3	FERM domain containing 3 [Source:HGNC Symbol;Acc:HGNC:24125]	257019	682.472	3.50753	0.350642	10.0032	1.47616e-23	1.84156e-21	up-regulated
ENSG00000172201	ID4	inhibitor of DNA binding 4, HLH protein [Source:HGNC Symbol;Acc:HGNC:5363]	3400	8565.16	2.48404	0.369164	6.72882	1.71039e-11	6.51865e-10	up-regulated
ENSG00000172318	B3GALT1	beta-1,3-galactosyltransferase 1 [Source:HGNC Symbol;Acc:HGNC:916]	8708	69.812	3.03089	0.498562	6.07926	1.2074e-09	3.66787e-08	up-regulated
ENSG00000172361	CFAP53	cilia and flagella associated protein 53 [Source:HGNC Symbol;Acc:HGNC:26530]	220136	241.141	2.51906	0.506558	4.97289	6.5963e-07	1.15307e-05	up-regulated
ENSG00000172379	ARNT2	aryl hydrocarbon receptor nuclear translocator 2 [Source:HGNC Symbol;Acc:HGNC:16876]	9915	6047.54	3.39372	0.467798	7.25467	4.02647e-13	1.86735e-11	up-regulated
ENSG00000172458	IL17D	interleukin 17D [Source:HGNC Symbol;Acc:HGNC:5984]	53342	4110.4	3.85019	0.463106	8.31384	9.26542e-17	6.48164e-15	up-regulated
ENSG00000172460	PRSS30P	serine protease 30, pseudogene [Source:HGNC Symbol;Acc:HGNC:28753]	124221	49.0178	-2.13368	0.45517	-4.68766	2.76346e-06	4.17038e-05	down-regulated
ENSG00000172461	FUT9	fucosyltransferase 9 [Source:HGNC Symbol;Acc:HGNC:4020]	10690	710.242	7.25892	0.467737	15.5192	2.57083e-54	2.46708e-51	up-regulated
ENSG00000172602	RND1	Rho family GTPase 1 [Source:HGNC Symbol;Acc:HGNC:18314]	27289	141.701	2.12997	0.422293	5.04381	4.56361e-07	8.26307e-06	up-regulated
ENSG00000172733	PURG	purine rich element binding protein G [Source:HGNC Symbol;Acc:HGNC:17930]	29942	125.559	2.64262	0.48203	5.48227	4.19896e-08	9.6072e-07	up-regulated
ENSG00000172771	EFCAB12	EF-hand calcium binding domain 12 [Source:HGNC Symbol;Acc:HGNC:28061]	90288	145.228	3.05231	0.374838	8.14302	3.85529e-16	2.54028e-14	up-regulated
ENSG00000172987	HPSE2	heparanase 2 (inactive) [Source:HGNC Symbol;Acc:HGNC:18374]	60495	152.609	6.19814	0.753212	8.22895	1.88857e-16	1.28279e-14	up-regulated
ENSG00000172995	ARPP21	cAMP regulated phosphoprotein 21 [Source:HGNC Symbol;Acc:HGNC:16968]	10777	234.98	5.21921	0.602563	8.66168	4.6485e-18	3.70948e-16	up-regulated
ENSG00000173013	CCDC96	coiled-coil domain containing 96 [Source:HGNC Symbol;Acc:HGNC:26900]	257236	205.492	2.35099	0.235566	9.98017	1.86152e-23	2.31459e-21	up-regulated
ENSG00000173068	BNC2	basonuclin 2 [Source:HGNC Symbol;Acc:HGNC:30988]	54796	3400.46	-2.21077	0.519401	-4.25639	2.07756e-05	0.000242756	down-regulated
ENSG00000173114	LRRN3	leucine rich repeat neuronal 3 [Source:HGNC Symbol;Acc:HGNC:17200]	54674	346.644	2.71768	0.566728	4.79539	1.6236e-06	2.59126e-05	up-regulated
ENSG00000173208	ABCD2	ATP binding cassette subfamily D member 2 [Source:HGNC Symbol;Acc:HGNC:66]	225	137.114	3.29673	0.386854	8.5219	1.5696e-17	1.18915e-15	up-regulated
ENSG00000173557	FAM166C	family with sequence similarity 166 member C [Source:HGNC Symbol;Acc:HGNC:27938]	339778	27.3343	3.67724	0.673163	5.46263	4.6913e-08	1.05388e-06	up-regulated
ENSG00000173705	SUSD5	sushi domain containing 5 [Source:HGNC Symbol;Acc:HGNC:29061]	26032	242.42	2.4464	0.576046	4.24688	2.16767e-05	0.000251714	up-regulated
ENSG00000173805	HAP1	huntingtin associated protein 1 [Source:HGNC Symbol;Acc:HGNC:4812]	9001	1603.51	5.3171	0.38323	13.8744	9.05136e-44	4.90951e-41	up-regulated
ENSG00000173811	CCDC13-AS1	CCDC13 antisense RNA 1 [Source:HGNC Symbol;Acc:HGNC:41142]	100874114	100.37	4.19423	0.393793	10.6508	1.72796e-26	2.71725e-24	up-regulated
ENSG00000173926	MARCHF3	membrane associated ring-CH-type finger 3 [Source:HGNC Symbol;Acc:HGNC:28728]	115123	531.124	2.35332	0.330087	7.12938	1.0082e-12	4.39263e-11	up-regulated
ENSG00000173947	PIFO	primary cilia formation [Source:HGNC Symbol;Acc:HGNC:27009]	128344	1233.81	4.54014	0.453134	10.0194	1.25222e-23	1.57797e-21	up-regulated
ENSG00000174306	ZHX3	zinc fingers and homeoboxes 3 [Source:HGNC Symbol;Acc:HGNC:15935]	23051	3906	2.43585	0.313382	7.77279	7.6776e-15	4.35367e-13	up-regulated
ENSG00000174460	ZCCHC12	zinc finger CCHC-type containing 12 [Source:HGNC Symbol;Acc:HGNC:27273]	170261	604.063	4.16444	0.679218	6.13122	8.72054e-10	2.69731e-08	up-regulated
ENSG00000174521	TTC9B	tetratricopeptide repeat domain 9B [Source:HGNC Symbol;Acc:HGNC:26395]	148014	45.8522	3.00298	0.550908	5.45097	5.0096e-08	1.12202e-06	up-regulated
ENSG00000174611	KY	kyphoscoliosis peptidase [Source:HGNC Symbol;Acc:HGNC:26576]	339855	198.074	3.95878	0.327168	12.1002	1.05411e-33	2.68376e-31	up-regulated
ENSG00000174628	IQCK	IQ motif containing K [Source:HGNC Symbol;Acc:HGNC:28556]	124152	3484.23	2.94318	0.357898	8.22351	1.97628e-16	1.33993e-14	up-regulated
ENSG00000174680	GRIK1-AS1	GRIK1 antisense RNA 1 [Source:HGNC Symbol;Acc:HGNC:16458]	NA	46.0279	3.21739	0.402087	8.00173	1.22682e-15	7.65251e-14	up-regulated
ENSG00000174684	B4GAT1	beta-1,4-glucuronyltransferase 1 [Source:HGNC Symbol;Acc:HGNC:15685]	11041	2933.54	2.11846	0.318092	6.65989	2.74025e-11	1.01742e-09	up-regulated
ENSG00000174740	PABPC5	poly(A) binding protein cytoplasmic 5 [Source:HGNC Symbol;Acc:HGNC:13629]	140886	95.1816	2.77001	0.628874	4.40471	1.05923e-05	0.000135023	up-regulated
ENSG00000174776	WDR49	WD repeat domain 49 [Source:HGNC Symbol;Acc:HGNC:26587]	151790	273.624	5.90371	0.428721	13.7705	3.83459e-43	1.96594e-40	up-regulated
ENSG00000174844	DNAH12	dynein axonemal heavy chain 12 [Source:HGNC Symbol;Acc:HGNC:2943]	201625	103.089	3.26856	0.583649	5.60021	2.14091e-08	5.21653e-07	up-regulated
ENSG00000174871	CNIH2	cornichon family AMPA receptor auxiliary protein 2 [Source:HGNC Symbol;Acc:HGNC:28744]	254263	540.555	2.97575	0.49575	6.00252	1.94273e-09	5.70712e-08	up-regulated
ENSG00000175048	ZDHHC14	zinc finger DHHC-type palmitoyltransferase 14 [Source:HGNC Symbol;Acc:HGNC:20341]	79683	1710.35	2.76097	0.345837	7.98347	1.4228e-15	8.78709e-14	up-regulated
ENSG00000175077	RTP1	receptor transporter protein 1 [Source:HGNC Symbol;Acc:HGNC:28580]	132112	172.324	6.36435	0.809208	7.86491	3.69353e-15	2.17691e-13	up-regulated
ENSG00000175161	CADM2	cell adhesion molecule 2 [Source:HGNC Symbol;Acc:HGNC:29849]	253559	1203.32	6.02058	0.438624	13.7261	7.08895e-43	3.58528e-40	up-regulated
ENSG00000175175	PPM1E	protein phosphatase, Mg2+/Mn2+ dependent 1E [Source:HGNC Symbol;Acc:HGNC:19322]	22843	259.364	2.42517	0.417855	5.80385	6.4809e-09	1.73999e-07	up-regulated
ENSG00000175267	VWA3A	von Willebrand factor A domain containing 3A [Source:HGNC Symbol;Acc:HGNC:27088]	146177	404.635	4.47013	0.527388	8.47598	2.33118e-17	1.71408e-15	up-regulated
ENSG00000175318	GRAMD2A	GRAM domain containing 2A [Source:HGNC Symbol;Acc:HGNC:27287]	196996	346.445	2.77144	0.531861	5.21083	1.87994e-07	3.71436e-06	up-regulated
ENSG00000175426	PCSK1	proprotein convertase subtilisin/kexin type 1 [Source:HGNC Symbol;Acc:HGNC:8743]	5122	743.753	2.60766	0.516932	5.0445	4.54717e-07	8.24127e-06	up-regulated
ENSG00000175643	RMI2	RecQ mediated genome instability 2 [Source:HGNC Symbol;Acc:HGNC:28349]	116028	208.301	-2.02618	0.384531	-5.26922	1.37002e-07	2.79272e-06	down-regulated
ENSG00000175664	TEX26	testis expressed 26 [Source:HGNC Symbol;Acc:HGNC:28622]	122046	163.964	5.76604	0.612463	9.41452	4.7523e-21	4.94055e-19	up-regulated
ENSG00000176049	JAKMIP2	janus kinase and microtubule interacting protein 2 [Source:HGNC Symbol;Acc:HGNC:29067]	9832	770.501	4.01831	0.403337	9.96266	2.2204e-23	2.71942e-21	up-regulated
ENSG00000176076	KCNE5	potassium voltage-gated channel subfamily E regulatory subunit 5 [Source:HGNC Symbol;Acc:HGNC:6241]	23630	136.48	4.84305	0.524012	9.24225	2.41366e-20	2.34025e-18	up-regulated
ENSG00000176204	LRRTM4	leucine rich repeat transmembrane neuronal 4 [Source:HGNC Symbol;Acc:HGNC:19411]	80059	121.315	4.17942	0.872461	4.79038	1.66468e-06	2.64778e-05	up-regulated
ENSG00000176244	ACBD7	acyl-CoA binding domain containing 7 [Source:HGNC Symbol;Acc:HGNC:17715]	414149	312.2	3.74133	0.548877	6.81633	9.33948e-12	3.70667e-10	up-regulated
ENSG00000176289	IDSP1	iduronate 2-sulfatase pseudogene 1 [Source:HGNC Symbol;Acc:HGNC:5390]	NA	29.267	-2.32934	0.539595	-4.31683	1.58288e-05	0.000191038	down-regulated
ENSG00000176381	PRR18	proline rich 18 [Source:HGNC Symbol;Acc:HGNC:28574]	285800	161.914	4.97078	0.533045	9.32525	1.10722e-20	1.11695e-18	up-regulated
ENSG00000176485	PLAAT3	phospholipase A and acyltransferase 3 [Source:HGNC Symbol;Acc:HGNC:17825]	11145	2247.16	2.40826	0.559831	4.30177	1.69442e-05	0.000203059	up-regulated
ENSG00000176595	KBTBD11	kelch repeat and BTB domain containing 11 [Source:HGNC Symbol;Acc:HGNC:29104]	9920	1842.5	3.23175	0.44227	7.30719	2.72789e-13	1.28907e-11	up-regulated
ENSG00000176601	MAP3K19	mitogen-activated protein kinase kinase kinase 19 [Source:HGNC Symbol;Acc:HGNC:26249]	80122	295.746	7.09505	0.449717	15.7767	4.49968e-56	4.81157e-53	up-regulated
ENSG00000176635	HORMAD2	HORMA domain containing 2 [Source:HGNC Symbol;Acc:HGNC:28383]	150280	12.5663	3.5551	0.726391	4.8942	9.87081e-07	1.65102e-05	up-regulated
ENSG00000176678	FOXL1	forkhead box L1 [Source:HGNC Symbol;Acc:HGNC:3817]	2300	170.048	-2.28083	0.531137	-4.29425	1.75284e-05	0.000209257	down-regulated
ENSG00000177098	SCN4B	sodium voltage-gated channel beta subunit 4 [Source:HGNC Symbol;Acc:HGNC:10592]	6330	1518.51	2.70432	0.562794	4.80517	1.54617e-06	2.49104e-05	up-regulated
ENSG00000177108	ZDHHC22	zinc finger DHHC-type palmitoyltransferase 22 [Source:HGNC Symbol;Acc:HGNC:20106]	283576	160.352	3.94912	0.603105	6.54798	5.83225e-11	2.07883e-09	up-regulated
ENSG00000177133	PRDM16-DT	PRDM16 divergent transcript [Source:HGNC Symbol;Acc:HGNC:48664]	440556	106.151	3.198	0.661361	4.83547	1.32828e-06	2.16989e-05	up-regulated
ENSG00000177234	LINC01561	long intergenic non-protein coding RNA 1561 [Source:HGNC Symbol;Acc:HGNC:31365]	404216	143.517	2.49943	0.531825	4.69972	2.60514e-06	3.95698e-05	up-regulated
ENSG00000177301	KCNA2	potassium voltage-gated channel subfamily A member 2 [Source:HGNC Symbol;Acc:HGNC:6220]	3737	435.169	3.46903	0.367246	9.44605	3.5185e-21	3.7094e-19	up-regulated
ENSG00000177453	NIM1K	NIM1 serine/threonine protein kinase [Source:HGNC Symbol;Acc:HGNC:28646]	167359	285.32	3.67032	0.336902	10.8943	1.2264e-27	2.13485e-25	up-regulated
ENSG00000177640	CASC2	cancer susceptibility 2 [Source:HGNC Symbol;Acc:HGNC:22933]	255082	517.249	2.75592	0.271323	10.1573	3.07341e-24	4.10805e-22	up-regulated
ENSG00000177807	KCNJ10	potassium inwardly rectifying channel subfamily J member 10 [Source:HGNC Symbol;Acc:HGNC:6256]	3766	3406.21	7.13576	0.641579	11.1222	9.78519e-29	1.82199e-26	up-regulated
ENSG00000177875	CCDC184	coiled-coil domain containing 184 [Source:HGNC Symbol;Acc:HGNC:33749]	387856	440.756	3.96463	0.513132	7.72633	1.10694e-14	6.13754e-13	up-regulated
ENSG00000177994	C2orf73	chromosome 2 open reading frame 73 [Source:HGNC Symbol;Acc:HGNC:26861]	129852	42.7554	3.24513	0.445623	7.28224	3.28334e-13	1.53988e-11	up-regulated
ENSG00000178053	MLF1	myeloid leukemia factor 1 [Source:HGNC Symbol;Acc:HGNC:7125]	4291	1157.71	2.67071	0.36969	7.22419	5.0409e-13	2.2868e-11	up-regulated
ENSG00000178104	PDE4DIP	phosphodiesterase 4D interacting protein [Source:HGNC Symbol;Acc:HGNC:15580]	9659	4773.36	2.02933	0.51367	3.95064	7.79411e-05	0.000749492	up-regulated
ENSG00000178162	FAR2P2	fatty acyl-CoA reductase 2 pseudogene 2 [Source:HGNC Symbol;Acc:HGNC:49279]	NA	172.546	2.6536	0.457357	5.80203	6.55159e-09	1.75393e-07	up-regulated
ENSG00000178445	GLDC	glycine decarboxylase [Source:HGNC Symbol;Acc:HGNC:4313]	2731	422.203	3.73725	0.669431	5.58273	2.36775e-08	5.7245e-07	up-regulated
ENSG00000178531	CTXN1	cortexin 1 [Source:HGNC Symbol;Acc:HGNC:31108]	404217	1484.67	2.75395	0.359204	7.66681	1.76323e-14	9.56387e-13	up-regulated
ENSG00000178568	ERBB4	erb-b2 receptor tyrosine kinase 4 [Source:HGNC Symbol;Acc:HGNC:3432]	2066	717.731	3.4542	0.661526	5.22156	1.77424e-07	3.52831e-06	up-regulated
ENSG00000178722	C5orf64	chromosome 5 putative open reading frame 64 [Source:HGNC Symbol;Acc:HGNC:26744]	285668	29.9556	3.20199	0.699188	4.57959	4.65894e-06	6.58978e-05	up-regulated
ENSG00000178796	RIIAD1	regulatory subunit of type II PKA R-subunit domain containing 1 [Source:HGNC Symbol;Acc:HGNC:26686]	284485	32.7413	2.68546	0.669309	4.01229	6.01336e-05	0.00060217	up-regulated
ENSG00000178821	TMEM52	transmembrane protein 52 [Source:HGNC Symbol;Acc:HGNC:27916]	339456	158.587	-3.09245	0.718982	-4.30115	1.69915e-05	0.000203561	down-regulated
ENSG00000178965	ERICH3	glutamate rich 3 [Source:HGNC Symbol;Acc:HGNC:25346]	127254	896.675	5.62962	0.462104	12.1826	3.84931e-34	1.02903e-31	up-regulated
ENSG00000179058	C9orf50	chromosome 9 open reading frame 50 [Source:HGNC Symbol;Acc:HGNC:23677]	375759	71.5618	2.41139	0.485581	4.96599	6.83508e-07	1.18815e-05	up-regulated
ENSG00000179071	CCDC89	coiled-coil domain containing 89 [Source:HGNC Symbol;Acc:HGNC:26762]	220388	155.884	3.15943	0.233903	13.5074	1.41336e-41	6.29721e-39	up-regulated
ENSG00000179083	FAM133A	family with sequence similarity 133 member A [Source:HGNC Symbol;Acc:HGNC:26748]	286499	140.517	2.41377	0.612308	3.94209	8.0774e-05	0.000772792	up-regulated
ENSG00000179133	C10orf67	chromosome 10 open reading frame 67 [Source:HGNC Symbol;Acc:HGNC:28716]	256815	54.1982	2.446	0.45408	5.38673	7.1753e-08	1.56311e-06	up-regulated
ENSG00000179242	CDH4	cadherin 4 [Source:HGNC Symbol;Acc:HGNC:1763]	1002	287.682	2.34457	0.384611	6.09595	1.08791e-09	3.32647e-08	up-regulated
ENSG00000179277	MEIS3P1	Meis homeobox 3 pseudogene 1 [Source:HGNC Symbol;Acc:HGNC:7002]	NA	168.439	2.17321	0.455825	4.76764	1.86392e-06	2.91392e-05	up-regulated
ENSG00000179292	TMEM151A	transmembrane protein 151A [Source:HGNC Symbol;Acc:HGNC:28497]	256472	111.981	2.8422	0.544346	5.22132	1.77655e-07	3.53103e-06	up-regulated
ENSG00000179314	WSCD1	WSC domain containing 1 [Source:HGNC Symbol;Acc:HGNC:29060]	23302	729.345	2.5355	0.462493	5.48225	4.19959e-08	9.6072e-07	up-regulated
ENSG00000179604	CDC42EP4	CDC42 effector protein 4 [Source:HGNC Symbol;Acc:HGNC:17147]	23580	5440.82	2.47286	0.435611	5.67677	1.37265e-08	3.45917e-07	up-regulated
ENSG00000179636	TPPP2	tubulin polymerization promoting protein family member 2 [Source:HGNC Symbol;Acc:HGNC:19293]	122664	54.3354	2.05923	0.423178	4.86612	1.13811e-06	1.88223e-05	up-regulated
ENSG00000179761	PIPOX	pipecolic acid and sarcosine oxidase [Source:HGNC Symbol;Acc:HGNC:17804]	51268	363.473	3.22446	0.367016	8.78562	1.55503e-18	1.28474e-16	up-regulated
ENSG00000179813	FAM216B	family with sequence similarity 216 member B [Source:HGNC Symbol;Acc:HGNC:26883]	144809	258.531	7.10347	0.390295	18.2003	5.13561e-74	1.4785e-70	up-regulated
ENSG00000179902	CFAP276	cilia and flagella associated protein 276 [Source:HGNC Symbol;Acc:HGNC:32331]	127003	357.088	6.13371	0.447888	13.6948	1.09135e-42	5.44598e-40	up-regulated
ENSG00000179915	NRXN1	neurexin 1 [Source:HGNC Symbol;Acc:HGNC:8008]	9378	984.947	3.87415	0.487921	7.94012	2.01993e-15	1.21736e-13	up-regulated
ENSG00000180155	LYNX1	Ly6/neurotoxin 1 [Source:HGNC Symbol;Acc:HGNC:29604]	66004	2462.34	2.8687	0.31185	9.19896	3.6142e-20	3.41579e-18	up-regulated
ENSG00000180332	KCTD4	potassium channel tetramerization domain containing 4 [Source:HGNC Symbol;Acc:HGNC:23227]	386618	60.8772	4.33457	0.817269	5.30372	1.13464e-07	2.36179e-06	up-regulated
ENSG00000180347	ITPRID1	ITPR interacting domain containing 1 [Source:HGNC Symbol;Acc:HGNC:27363]	223075	189.205	5.07303	1.08869	4.65978	3.16548e-06	4.69937e-05	up-regulated
ENSG00000180354	MTURN	maturin, neural progenitor differentiation regulator homolog [Source:HGNC Symbol;Acc:HGNC:25457]	222166	12140.1	3.55365	0.320351	11.093	1.3564e-28	2.47632e-26	up-regulated
ENSG00000180509	KCNE1	potassium voltage-gated channel subfamily E regulatory subunit 1 [Source:HGNC Symbol;Acc:HGNC:6240]	3753	333.249	-2.54975	0.610286	-4.17796	2.94137e-05	0.000329691	down-regulated
ENSG00000180537	RNF182	ring finger protein 182 [Source:HGNC Symbol;Acc:HGNC:28522]	221687	473.569	4.5593	0.486533	9.37099	7.18529e-21	7.38782e-19	up-regulated
ENSG00000180613	GSX2	GS homeobox 2 [Source:HGNC Symbol;Acc:HGNC:24959]	170825	18.2038	5.53916	0.764843	7.24223	4.41373e-13	2.02685e-11	up-regulated
ENSG00000180638	SLC47A2	solute carrier family 47 member 2 [Source:HGNC Symbol;Acc:HGNC:26439]	146802	1660.99	5.80867	0.621958	9.33933	9.69429e-21	9.83248e-19	up-regulated
ENSG00000180769	WDFY3-AS2	WDFY3 antisense RNA 2 [Source:HGNC Symbol;Acc:HGNC:21603]	404201	443.289	2.1839	0.22468	9.72005	2.47666e-22	2.80884e-20	up-regulated
ENSG00000180828	BHLHE22	basic helix-loop-helix family member e22 [Source:HGNC Symbol;Acc:HGNC:11963]	27319	242.652	-2.9792	0.695404	-4.28413	1.83456e-05	0.000217554	down-regulated
ENSG00000181215	C4orf50	chromosome 4 open reading frame 50 [Source:HGNC Symbol;Acc:HGNC:33766]	389197	363.037	3.32145	0.702875	4.72552	2.29523e-06	3.51766e-05	up-regulated
ENSG00000181291	TMEM132E	transmembrane protein 132E [Source:HGNC Symbol;Acc:HGNC:26991]	124842	1246.74	6.02504	0.521127	11.5616	6.45249e-31	1.37211e-28	up-regulated
ENSG00000181374	CCL13	C-C motif chemokine ligand 13 [Source:HGNC Symbol;Acc:HGNC:10611]	6357	42.909	-4.00041	1.0171	-3.93314	8.38434e-05	0.000798251	down-regulated
ENSG00000181378	CFAP65	cilia and flagella associated protein 65 [Source:HGNC Symbol;Acc:HGNC:25325]	255101	181.117	4.13619	0.638249	6.48053	9.13988e-11	3.18204e-09	up-regulated
ENSG00000181449	SOX2	SRY-box transcription factor 2 [Source:HGNC Symbol;Acc:HGNC:11195]	6657	3750.37	5.01078	0.791842	6.328	2.48358e-10	8.26226e-09	up-regulated
ENSG00000181585	TMIE	transmembrane inner ear [Source:HGNC Symbol;Acc:HGNC:30800]	259236	368.789	3.84626	0.498779	7.71136	1.24485e-14	6.84135e-13	up-regulated
ENSG00000181619	GPR135	G protein-coupled receptor 135 [Source:HGNC Symbol;Acc:HGNC:19991]	64582	232.052	2.71765	0.267431	10.1621	2.92827e-24	3.92808e-22	up-regulated
ENSG00000181634	TNFSF15	TNF superfamily member 15 [Source:HGNC Symbol;Acc:HGNC:11931]	9966	154.558	-2.12256	0.488744	-4.3429	1.40616e-05	0.000172378	down-regulated
ENSG00000181656	GPR88	G protein-coupled receptor 88 [Source:HGNC Symbol;Acc:HGNC:4539]	54112	144.903	3.55023	0.612602	5.79532	6.8189e-09	1.81959e-07	up-regulated
ENSG00000181908	LINC02724	long intergenic non-protein coding RNA 2724 [Source:HGNC Symbol;Acc:HGNC:54241]	100996455	55.2473	3.04359	0.450262	6.75959	1.38379e-11	5.36683e-10	up-regulated
ENSG00000182035	ADIG	adipogenin [Source:HGNC Symbol;Acc:HGNC:28606]	149685	2.476	4.98981	1.08547	4.59692	4.28777e-06	6.12496e-05	up-regulated
ENSG00000182103	FAM181B	family with sequence similarity 181 member B [Source:HGNC Symbol;Acc:HGNC:28512]	220382	2291.18	5.65659	0.72582	7.79338	6.52414e-15	3.73924e-13	up-regulated
ENSG00000182175	RGMA	repulsive guidance molecule BMP co-receptor a [Source:HGNC Symbol;Acc:HGNC:30308]	56963	4149.43	3.68535	0.395477	9.31874	1.17728e-20	1.18126e-18	up-regulated
ENSG00000182253	SYNM	synemin [Source:HGNC Symbol;Acc:HGNC:24466]	23336	10613.2	5.10282	0.534114	9.55379	1.25031e-21	1.36426e-19	up-regulated
ENSG00000182256	GABRG3	gamma-aminobutyric acid type A receptor subunit gamma3 [Source:HGNC Symbol;Acc:HGNC:4088]	2567	122.344	2.6147	0.621366	4.20799	2.57649e-05	0.000292738	up-regulated
ENSG00000182263	FIGN	fidgetin, microtubule severing factor [Source:HGNC Symbol;Acc:HGNC:13285]	55137	647.068	3.73936	0.600752	6.22448	4.83171e-10	1.54954e-08	up-regulated
ENSG00000182329	KIAA2012	KIAA2012 [Source:HGNC Symbol;Acc:HGNC:51250]	100652824	193.919	3.47813	0.634424	5.48234	4.19728e-08	9.6072e-07	up-regulated
ENSG00000182600	SNORC	secondary ossification center associated regulator of chondrocyte maturation [Source:HGNC Symbol;Acc:HGNC:33763]	389084	924.417	2.43495	0.272334	8.94103	3.85566e-19	3.36368e-17	up-regulated
ENSG00000182621	PLCB1	phospholipase C beta 1 [Source:HGNC Symbol;Acc:HGNC:15917]	23236	976.701	2.15287	0.285447	7.54212	4.62391e-14	2.38696e-12	up-regulated
ENSG00000182700	IGIP	IgA inducing protein [Source:HGNC Symbol;Acc:HGNC:33847]	492311	1138.82	2.24173	0.300259	7.46598	8.26807e-14	4.15915e-12	up-regulated
ENSG00000182732	RGS6	regulator of G protein signaling 6 [Source:HGNC Symbol;Acc:HGNC:10002]	9628	131.055	3.0218	0.440307	6.86293	6.7463e-12	2.70909e-10	up-regulated
ENSG00000182771	GRID1	glutamate ionotropic receptor delta type subunit 1 [Source:HGNC Symbol;Acc:HGNC:4575]	2894	687.577	4.61776	0.375944	12.2831	1.11617e-34	3.11744e-32	up-regulated
ENSG00000182836	PLCXD3	phosphatidylinositol specific phospholipase C X domain containing 3 [Source:HGNC Symbol;Acc:HGNC:31822]	345557	1369.68	2.84459	0.580553	4.89979	9.5941e-07	1.61162e-05	up-regulated
ENSG00000182890	GLUD2	glutamate dehydrogenase 2 [Source:HGNC Symbol;Acc:HGNC:4336]	2747	69.1188	2.20576	0.21767	10.1335	3.9237e-24	5.17072e-22	up-regulated
ENSG00000182902	SLC25A18	solute carrier family 25 member 18 [Source:HGNC Symbol;Acc:HGNC:10988]	83733	894.904	5.38453	0.319311	16.863	8.42388e-64	1.43306e-60	up-regulated
ENSG00000182916	TCEAL7	transcription elongation factor A like 7 [Source:HGNC Symbol;Acc:HGNC:28336]	56849	370.044	2.2822	0.425146	5.36803	7.95997e-08	1.71706e-06	up-regulated
ENSG00000182968	SOX1	SRY-box transcription factor 1 [Source:HGNC Symbol;Acc:HGNC:11189]	6656	367.611	3.99217	0.887789	4.49676	6.89982e-06	9.32248e-05	up-regulated
ENSG00000183044	ABAT	4-aminobutyrate aminotransferase [Source:HGNC Symbol;Acc:HGNC:23]	18	4688.87	3.72017	0.263215	14.1335	2.35958e-45	1.4477e-42	up-regulated
ENSG00000183055	FAM133CP	family with sequence similarity 133 member C, pseudogene [Source:HGNC Symbol;Acc:HGNC:44190]	NA	61.8056	-3.70561	0.791451	-4.68205	2.84024e-06	4.26904e-05	down-regulated
ENSG00000183067	IGSF5	immunoglobulin superfamily member 5 [Source:HGNC Symbol;Acc:HGNC:5952]	150084	47.2538	2.71205	0.56776	4.77676	1.78146e-06	2.8061e-05	up-regulated
ENSG00000183117	CSMD1	CUB and Sushi multiple domains 1 [Source:HGNC Symbol;Acc:HGNC:14026]	64478	193.647	2.53302	0.625016	4.05273	5.06245e-05	0.000520944	up-regulated
ENSG00000183145	RIPPLY3	ripply transcriptional repressor 3 [Source:HGNC Symbol;Acc:HGNC:3047]	53820	11.6002	-3.06602	0.755788	-4.05672	4.97662e-05	0.000513807	down-regulated
ENSG00000183150	GPR19	G protein-coupled receptor 19 [Source:HGNC Symbol;Acc:HGNC:4473]	2842	129.556	3.63917	0.391168	9.30335	1.36094e-20	1.35104e-18	up-regulated
ENSG00000183196	CHST6	carbohydrate sulfotransferase 6 [Source:HGNC Symbol;Acc:HGNC:6938]	4166	2105.98	4.72286	0.539381	8.75607	2.02178e-18	1.66302e-16	up-regulated
ENSG00000183287	CCBE1	collagen and calcium binding EGF domains 1 [Source:HGNC Symbol;Acc:HGNC:29426]	147372	101.584	-2.74616	0.661941	-4.14865	3.34436e-05	0.000367703	down-regulated
ENSG00000183346	CABCOCO1	ciliary associated calcium binding coiled-coil 1 [Source:HGNC Symbol;Acc:HGNC:28678]	219621	326.546	2.91677	0.650762	4.48208	7.39185e-06	9.89178e-05	up-regulated
ENSG00000183454	GRIN2A	glutamate ionotropic receptor NMDA type subunit 2A [Source:HGNC Symbol;Acc:HGNC:4585]	2903	1019.6	5.47565	0.506718	10.8061	3.21981e-27	5.40379e-25	up-regulated
ENSG00000183496	MEX3B	mex-3 RNA binding family member B [Source:HGNC Symbol;Acc:HGNC:25297]	84206	425.185	-2.06138	0.463678	-4.44571	8.7601e-06	0.000114435	down-regulated
ENSG00000183631	PRR32	proline rich 32 [Source:HGNC Symbol;Acc:HGNC:34498]	100130613	17.4102	5.25111	0.725768	7.23525	4.64688e-13	2.12349e-11	up-regulated
ENSG00000183644	HOATZ	HOATZ cilia and flagella associated protein [Source:HGNC Symbol;Acc:HGNC:25061]	399949	172.543	5.04672	0.531168	9.50117	2.07547e-21	2.23851e-19	up-regulated
ENSG00000183690	EFHC2	EF-hand domain containing 2 [Source:HGNC Symbol;Acc:HGNC:26233]	80258	284.797	3.7147	0.379402	9.79093	1.23158e-22	1.44041e-20	up-regulated
ENSG00000183783	KCTD8	potassium channel tetramerization domain containing 8 [Source:HGNC Symbol;Acc:HGNC:22394]	386617	23.6847	3.85717	0.98119	3.93111	8.45541e-05	0.000803684	up-regulated
ENSG00000183831	ANKRD45	ankyrin repeat domain 45 [Source:HGNC Symbol;Acc:HGNC:24786]	339416	325.704	4.38959	0.426138	10.3009	6.98342e-25	9.90005e-23	up-regulated
ENSG00000183833	CFAP91	cilia and flagella associated protein 91 [Source:HGNC Symbol;Acc:HGNC:24010]	89876	368.294	2.11182	0.43029	4.90791	9.2052e-07	1.55143e-05	up-regulated
ENSG00000183888	SRARP	steroid receptor associated and regulated protein [Source:HGNC Symbol;Acc:HGNC:28339]	149563	65.7157	3.28904	0.559633	5.87714	4.17422e-09	1.1595e-07	up-regulated
ENSG00000183908	LRRC55	leucine rich repeat containing 55 [Source:HGNC Symbol;Acc:HGNC:32324]	219527	1482.59	6.82847	0.630977	10.8221	2.70622e-27	4.56229e-25	up-regulated
ENSG00000183914	DNAH2	dynein axonemal heavy chain 2 [Source:HGNC Symbol;Acc:HGNC:2948]	146754	225.077	3.03076	0.536132	5.65301	1.57659e-08	3.91802e-07	up-regulated
ENSG00000183921	SDR42E2	short chain dehydrogenase/reductase family 42E, member 2 [Source:HGNC Symbol;Acc:HGNC:35414]	100288072	66.2435	2.59192	0.580926	4.46172	8.13058e-06	0.000107297	up-regulated
ENSG00000184113	CLDN5	claudin 5 [Source:HGNC Symbol;Acc:HGNC:2047]	7122	1853.2	2.51496	0.555677	4.52593	6.01302e-06	8.24335e-05	up-regulated
ENSG00000184144	CNTN2	contactin 2 [Source:HGNC Symbol;Acc:HGNC:2172]	6900	417.833	4.2883	0.777251	5.51727	3.44316e-08	8.00893e-07	up-regulated
ENSG00000184156	KCNQ3	potassium voltage-gated channel subfamily Q member 3 [Source:HGNC Symbol;Acc:HGNC:6297]	3786	438.64	2.90826	0.264863	10.9802	4.75646e-28	8.47692e-26	up-regulated
ENSG00000184221	OLIG1	oligodendrocyte transcription factor 1 [Source:HGNC Symbol;Acc:HGNC:16983]	116448	1169.58	7.29341	0.647646	11.2614	2.03453e-29	4.02879e-27	up-regulated
ENSG00000184226	PCDH9	protocadherin 9 [Source:HGNC Symbol;Acc:HGNC:8661]	5101	1437.99	5.47099	0.493116	11.0947	1.33066e-28	2.44124e-26	up-regulated
ENSG00000184227	ACOT1	acyl-CoA thioesterase 1 [Source:HGNC Symbol;Acc:HGNC:33128]	641371	249.071	2.02596	0.516361	3.92353	8.72606e-05	0.000825744	up-regulated
ENSG00000184304	PRKD1	protein kinase D1 [Source:HGNC Symbol;Acc:HGNC:9407]	5587	870.859	2.30629	0.23588	9.77739	1.40799e-22	1.6264e-20	up-regulated
ENSG00000184343	SRPK3	SRSF protein kinase 3 [Source:HGNC Symbol;Acc:HGNC:11402]	26576	673.97	2.01216	0.364045	5.52724	3.25309e-08	7.62367e-07	up-regulated
ENSG00000184349	EFNA5	ephrin A5 [Source:HGNC Symbol;Acc:HGNC:3225]	1946	580.687	-2.03216	0.520965	-3.90077	9.58867e-05	0.000894704	down-regulated
ENSG00000184486	POU3F2	POU class 3 homeobox 2 [Source:HGNC Symbol;Acc:HGNC:9215]	5454	546.396	7.15805	0.68137	10.5054	8.16022e-26	1.22162e-23	up-regulated
ENSG00000184502	GAST	gastrin [Source:HGNC Symbol;Acc:HGNC:4164]	2520	5.4634	3.47541	0.864652	4.01943	5.83388e-05	0.000587564	up-regulated
ENSG00000184524	CEND1	cell cycle exit and neuronal differentiation 1 [Source:HGNC Symbol;Acc:HGNC:24153]	51286	360.781	4.24088	0.570891	7.42853	1.09808e-13	5.42889e-12	up-regulated
ENSG00000184588	PDE4B	phosphodiesterase 4B [Source:HGNC Symbol;Acc:HGNC:8781]	5142	1973.36	2.10732	0.409357	5.14788	2.63442e-07	5.03297e-06	up-regulated
ENSG00000184608	FAM167A-AS1	FAM167A antisense RNA 1 [Source:HGNC Symbol;Acc:HGNC:15548]	83656	111.093	4.1272	0.830975	4.96669	6.8104e-07	1.18441e-05	up-regulated
ENSG00000184672	RALYL	RALY RNA binding protein like [Source:HGNC Symbol;Acc:HGNC:27036]	138046	65.471	2.96456	0.560447	5.28963	1.22562e-07	2.53706e-06	up-regulated
ENSG00000185101	ANO9	anoctamin 9 [Source:HGNC Symbol;Acc:HGNC:20679]	338440	804.02	-2.46582	0.414582	-5.94773	2.71894e-09	7.80961e-08	down-regulated
ENSG00000185250	PPIL6	peptidylprolyl isomerase like 6 [Source:HGNC Symbol;Acc:HGNC:21557]	285755	614.294	2.49673	0.259399	9.62504	6.268e-22	6.8996e-20	up-regulated
ENSG00000185274	GALNT17	polypeptide N-acetylgalactosaminyltransferase 17 [Source:HGNC Symbol;Acc:HGNC:16347]	64409	951.73	3.5414	0.653172	5.42185	5.89865e-08	1.30629e-06	up-regulated
ENSG00000185352	HS6ST3	heparan sulfate 6-O-sulfotransferase 3 [Source:HGNC Symbol;Acc:HGNC:19134]	266722	340.87	4.59494	0.440369	10.4343	1.72914e-25	2.5579e-23	up-regulated
ENSG00000185437	SH3BGR	SH3 domain binding glutamate rich protein [Source:HGNC Symbol;Acc:HGNC:10822]	6450	415.47	2.60046	0.29238	8.8941	5.88971e-19	5.07899e-17	up-regulated
ENSG00000185522	LMNTD2	lamin tail domain containing 2 [Source:HGNC Symbol;Acc:HGNC:28561]	256329	587.407	-2.51563	0.431172	-5.8344	5.39835e-09	1.46929e-07	down-regulated
ENSG00000185565	LSAMP	limbic system associated membrane protein [Source:HGNC Symbol;Acc:HGNC:6705]	4045	3374.72	3.89448	0.489142	7.96186	1.69468e-15	1.03298e-13	up-regulated
ENSG00000185610	DBX2	developing brain homeobox 2 [Source:HGNC Symbol;Acc:HGNC:33186]	440097	205.699	6.4629	0.698239	9.256	2.12229e-20	2.06309e-18	up-regulated
ENSG00000185634	SHC4	SHC adaptor protein 4 [Source:HGNC Symbol;Acc:HGNC:16743]	399694	322.61	2.64559	0.342625	7.72152	1.14953e-14	6.36425e-13	up-regulated
ENSG00000185652	NTF3	neurotrophin 3 [Source:HGNC Symbol;Acc:HGNC:8023]	4908	70.0798	-2.96925	0.565064	-5.25471	1.48257e-07	2.99604e-06	down-regulated
ENSG00000185666	SYN3	synapsin III [Source:HGNC Symbol;Acc:HGNC:11496]	8224	146.544	3.2527	0.427939	7.60084	2.94211e-14	1.55744e-12	up-regulated
ENSG00000185681	MORN5	MORN repeat containing 5 [Source:HGNC Symbol;Acc:HGNC:17841]	254956	151.293	5.74083	0.587716	9.76803	1.54421e-22	1.77281e-20	up-regulated
ENSG00000185736	ADARB2	adenosine deaminase RNA specific B2 (inactive) [Source:HGNC Symbol;Acc:HGNC:227]	105	578.143	4.87854	0.719354	6.78183	1.18661e-11	4.66005e-10	up-regulated
ENSG00000185737	NRG3	neuregulin 3 [Source:HGNC Symbol;Acc:HGNC:7999]	10718	492.675	4.53406	0.601388	7.53933	4.724e-14	2.43527e-12	up-regulated
ENSG00000185742	C11orf87	chromosome 11 open reading frame 87 [Source:HGNC Symbol;Acc:HGNC:33788]	399947	23.2813	2.31102	0.581427	3.97473	7.04581e-05	0.000688862	up-regulated
ENSG00000185818	NAT8L	N-acetyltransferase 8 like [Source:HGNC Symbol;Acc:HGNC:26742]	339983	4316.61	6.15014	0.297102	20.7004	3.43498e-95	1.83653e-91	up-regulated
ENSG00000185860	CCDC190	coiled-coil domain containing 190 [Source:HGNC Symbol;Acc:HGNC:28736]	339512	37.0102	3.31457	0.694497	4.77262	1.81846e-06	2.85118e-05	up-regulated
ENSG00000185904	LINC00839	long intergenic non-protein coding RNA 839 [Source:HGNC Symbol;Acc:HGNC:28269]	84856	193.018	3.74738	0.439988	8.51701	1.6373e-17	1.23295e-15	up-regulated
ENSG00000185960	SHOX	short stature homeobox [Source:HGNC Symbol;Acc:HGNC:10853]	6473	10.0664	-6.1593	1.50782	-4.0849	4.40951e-05	0.000464367	down-regulated
ENSG00000185985	SLITRK2	SLIT and NTRK like family member 2 [Source:HGNC Symbol;Acc:HGNC:13449]	84631	886.669	3.41872	0.63016	5.42517	5.79002e-08	1.28375e-06	up-regulated
ENSG00000186094	AGBL4	AGBL carboxypeptidase 4 [Source:HGNC Symbol;Acc:HGNC:25892]	84871	120.513	2.5113	0.584634	4.29551	1.74289e-05	0.000208268	up-regulated
ENSG00000186197	EDARADD	EDAR associated death domain [Source:HGNC Symbol;Acc:HGNC:14341]	128178	398.203	-2.28435	0.526484	-4.33889	1.43205e-05	0.000175092	down-regulated
ENSG00000186198	SLC51B	solute carrier family 51 subunit beta [Source:HGNC Symbol;Acc:HGNC:29956]	123264	74.8864	3.96508	0.502434	7.89174	2.98008e-15	1.77036e-13	up-regulated
ENSG00000186205	MTARC1	mitochondrial amidoxime reducing component 1 [Source:HGNC Symbol;Acc:HGNC:26189]	64757	246.325	2.12514	0.345724	6.14694	7.89934e-10	2.46367e-08	up-regulated
ENSG00000186231	KLHL32	kelch like family member 32 [Source:HGNC Symbol;Acc:HGNC:21221]	114792	346.929	5.42517	0.413558	13.1183	2.58774e-39	1.04139e-36	up-regulated
ENSG00000186288	PABPC1L2A	poly(A) binding protein cytoplasmic 1 like 2A [Source:HGNC Symbol;Acc:HGNC:27989]	340529	9.81824	4.17279	0.649687	6.42277	1.33818e-10	4.56544e-09	up-regulated
ENSG00000186310	NAP1L3	nucleosome assembly protein 1 like 3 [Source:HGNC Symbol;Acc:HGNC:7639]	4675	968.163	2.49049	0.352595	7.06333	1.62563e-12	6.92949e-11	up-regulated
ENSG00000186471	AKAP14	A-kinase anchoring protein 14 [Source:HGNC Symbol;Acc:HGNC:24061]	158798	43.5046	2.46751	0.443806	5.55988	2.6996e-08	6.44229e-07	up-regulated
ENSG00000186481	ANKRD20A5P	ankyrin repeat domain 20 family member A5, pseudogene [Source:HGNC Symbol;Acc:HGNC:33833]	NA	75.9748	-2.38195	0.559752	-4.25536	2.08708e-05	0.000243565	down-regulated
ENSG00000186564	FOXD2	forkhead box D2 [Source:HGNC Symbol;Acc:HGNC:3803]	2306	175.913	-3.39343	0.778811	-4.35719	1.3174e-05	0.000162615	down-regulated
ENSG00000186715	MST1L	macrophage stimulating 1 like (pseudogene) [Source:HGNC Symbol;Acc:HGNC:7390]	NA	295.61	-2.63626	0.664439	-3.96765	7.25851e-05	0.000705969	down-regulated
ENSG00000186868	MAPT	microtubule associated protein tau [Source:HGNC Symbol;Acc:HGNC:6893]	4137	3484.74	5.20175	0.397169	13.0971	3.42208e-39	1.34816e-36	up-regulated
ENSG00000186891	TNFRSF18	TNF receptor superfamily member 18 [Source:HGNC Symbol;Acc:HGNC:11914]	8784	189.178	-2.09282	0.423787	-4.93837	7.8778e-07	1.35245e-05	down-regulated
ENSG00000186952	TMEM232	transmembrane protein 232 [Source:HGNC Symbol;Acc:HGNC:37270]	642987	208.758	2.32114	0.506597	4.58181	4.60959e-06	6.5249e-05	up-regulated
ENSG00000187068	C3orf70	chromosome 3 open reading frame 70 [Source:HGNC Symbol;Acc:HGNC:33731]	285382	644.508	3.34538	0.396787	8.43118	3.42208e-17	2.47249e-15	up-regulated
ENSG00000187122	SLIT1	slit guidance ligand 1 [Source:HGNC Symbol;Acc:HGNC:11085]	6585	372.105	3.19796	0.551661	5.79697	6.75238e-09	1.8051e-07	up-regulated
ENSG00000187391	MAGI2	membrane associated guanylate kinase, WW and PDZ domain containing 2 [Source:HGNC Symbol;Acc:HGNC:18957]	9863	1215.4	2.35062	0.327712	7.17281	7.34735e-13	3.25422e-11	up-regulated
ENSG00000187398	LUZP2	leucine zipper protein 2 [Source:HGNC Symbol;Acc:HGNC:23206]	338645	1424.71	4.9102	0.509016	9.64645	5.08848e-22	5.6679e-20	up-regulated
ENSG00000187416	LHFPL3	LHFPL tetraspan subfamily member 3 [Source:HGNC Symbol;Acc:HGNC:6589]	375612	862.381	7.92937	0.62426	12.702	5.76157e-37	1.81204e-34	up-regulated
ENSG00000187486	KCNJ11	potassium inwardly rectifying channel subfamily J member 11 [Source:HGNC Symbol;Acc:HGNC:6257]	3767	100.276	2.15591	0.460389	4.68279	2.82992e-06	4.25694e-05	up-regulated
ENSG00000187492	CDHR4	cadherin related family member 4 [Source:HGNC Symbol;Acc:HGNC:34527]	389118	46.159	4.3126	0.671042	6.42672	1.30387e-10	4.4565e-09	up-regulated
ENSG00000187527	ATP13A5	ATPase 13A5 [Source:HGNC Symbol;Acc:HGNC:31789]	344905	22.6024	2.18437	0.533689	4.09297	4.25891e-05	0.000451146	up-regulated
ENSG00000187699	C2orf88	chromosome 2 open reading frame 88 [Source:HGNC Symbol;Acc:HGNC:28191]	84281	819.994	2.38896	0.544791	4.3851	1.15934e-05	0.000145701	up-regulated
ENSG00000187720	THSD4	thrombospondin type 1 domain containing 4 [Source:HGNC Symbol;Acc:HGNC:25835]	79875	1571.65	-2.96391	0.628488	-4.71593	2.40608e-06	3.67551e-05	down-regulated
ENSG00000187867	PALM3	paralemmin 3 [Source:HGNC Symbol;Acc:HGNC:33274]	342979	654.944	4.4956	0.497841	9.0302	1.71365e-19	1.52702e-17	up-regulated
ENSG00000187902	SHISA7	shisa family member 7 [Source:HGNC Symbol;Acc:HGNC:35409]	729956	161.901	3.9798	0.709847	5.60656	2.06387e-08	5.05025e-07	up-regulated
ENSG00000187905	LRRC74B	leucine rich repeat containing 74B [Source:HGNC Symbol;Acc:HGNC:34301]	400891	53.819	4.2191	0.891652	4.73177	2.22566e-06	3.42545e-05	up-regulated
ENSG00000187957	DNER	delta/notch like EGF repeat containing [Source:HGNC Symbol;Acc:HGNC:24456]	92737	6453.87	6.00997	0.271983	22.0969	3.38617e-108	3.16827e-104	up-regulated
ENSG00000187980	PLA2G2C	phospholipase A2 group IIC [Source:HGNC Symbol;Acc:HGNC:9032]	391013	87.5551	2.59193	0.509198	5.09023	3.57634e-07	6.63599e-06	up-regulated
ENSG00000188011	RTP5	receptor transporter protein 5 (putative) [Source:HGNC Symbol;Acc:HGNC:26585]	285093	118.865	3.80684	0.784262	4.85403	1.20975e-06	1.99191e-05	up-regulated
ENSG00000188013	MEIS3P2	Meis homeobox 3 pseudogene 2 [Source:HGNC Symbol;Acc:HGNC:17638]	NA	41.8962	2.4934	0.536366	4.64869	3.34043e-06	4.93172e-05	up-regulated
ENSG00000188039	NWD1	NACHT and WD repeat domain containing 1 [Source:HGNC Symbol;Acc:HGNC:27619]	284434	1118.42	3.72594	0.634171	5.87528	4.22123e-09	1.17025e-07	up-regulated
ENSG00000188257	PLA2G2A	phospholipase A2 group IIA [Source:HGNC Symbol;Acc:HGNC:9031]	5320	941.653	3.61656	0.905103	3.99574	6.44928e-05	0.000638885	up-regulated
ENSG00000188316	ENO4	enolase 4 [Source:HGNC Symbol;Acc:HGNC:31670]	387712	237.383	2.6656	0.334112	7.97817	1.48514e-15	9.12692e-14	up-regulated
ENSG00000188338	SLC38A3	solute carrier family 38 member 3 [Source:HGNC Symbol;Acc:HGNC:18044]	10991	567.543	3.97325	0.554766	7.16202	7.94956e-13	3.50849e-11	up-regulated
ENSG00000188523	CFAP77	cilia and flagella associated protein 77 [Source:HGNC Symbol;Acc:HGNC:33776]	389799	171.578	5.68779	0.640935	8.8742	7.04369e-19	6.00495e-17	up-regulated
ENSG00000188549	CCDC9B	coiled-coil domain containing 9B [Source:HGNC Symbol;Acc:HGNC:33488]	388115	1574.09	2.32867	0.38243	6.08915	1.13509e-09	3.45661e-08	up-regulated
ENSG00000188580	NKAIN2	sodium/potassium transporting ATPase interacting 2 [Source:HGNC Symbol;Acc:HGNC:16443]	154215	67.7993	2.61412	0.644946	4.05323	5.05145e-05	0.000520241	up-regulated
ENSG00000188596	CFAP54	cilia and flagella associated protein 54 [Source:HGNC Symbol;Acc:HGNC:26456]	144535	326.469	4.45243	0.371995	11.9691	5.16087e-33	1.27914e-30	up-regulated
ENSG00000188674	C2orf80	chromosome 2 open reading frame 80 [Source:HGNC Symbol;Acc:HGNC:34352]	389073	35.842	4.60359	0.67786	6.79135	1.11088e-11	4.38101e-10	up-regulated
ENSG00000188729	OSTN	osteocrin [Source:HGNC Symbol;Acc:HGNC:29961]	344901	26.2612	4.98815	0.53536	9.31738	1.19252e-20	1.19335e-18	up-regulated
ENSG00000188730	VWC2	von Willebrand factor C domain containing 2 [Source:HGNC Symbol;Acc:HGNC:30200]	375567	143.604	5.08782	0.588033	8.65226	5.04883e-18	3.99487e-16	up-regulated
ENSG00000188869	TMC3	transmembrane channel like 3 [Source:HGNC Symbol;Acc:HGNC:22995]	342125	22.9085	-2.33551	0.597955	-3.90582	9.39051e-05	0.000880604	down-regulated
ENSG00000188931	CFAP126	cilia and flagella associated protein 126 [Source:HGNC Symbol;Acc:HGNC:32325]	257177	870.087	3.6118	0.223807	16.138	1.37966e-58	1.6136e-55	up-regulated
ENSG00000189157	FAM47E	family with sequence similarity 47 member E [Source:HGNC Symbol;Acc:HGNC:34343]	100129583	210.347	3.51837	0.34246	10.2738	9.24565e-25	1.29598e-22	up-regulated
ENSG00000189316		novel transcript, antisense to ZNF273	441239	51.652	2.7005	0.466292	5.79142	6.97918e-09	1.85499e-07	up-regulated
ENSG00000189350	TOGARAM2	TOG array regulator of axonemal microtubules 2 [Source:HGNC Symbol;Acc:HGNC:33715]	165186	514.484	3.56733	0.478183	7.46019	8.63961e-14	4.32281e-12	up-regulated
ENSG00000189367	KIAA0408	KIAA0408 [Source:HGNC Symbol;Acc:HGNC:21636]	9729	722.879	3.38824	0.234646	14.4398	2.90663e-47	2.05252e-44	up-regulated
ENSG00000189409	MMP23B	matrix metallopeptidase 23B [Source:HGNC Symbol;Acc:HGNC:7171]	8510	25.8393	-2.17235	0.523297	-4.15128	3.30622e-05	0.000364258	down-regulated
ENSG00000189423	USP32P3	ubiquitin specific peptidase 32 pseudogene 3 [Source:HGNC Symbol;Acc:HGNC:43576]	NA	123.891	2.63584	0.508601	5.18253	2.18891e-07	4.24687e-06	up-regulated
ENSG00000196091	MYBPC1	myosin binding protein C1 [Source:HGNC Symbol;Acc:HGNC:7549]	4604	578.135	6.00965	0.590094	10.1842	2.33213e-24	3.15098e-22	up-regulated
ENSG00000196104	SPOCK3	SPARC (osteonectin), cwcv and kazal like domains proteoglycan 3 [Source:HGNC Symbol;Acc:HGNC:13565]	50859	140.004	3.50534	0.776503	4.51426	6.35381e-06	8.64404e-05	up-regulated
ENSG00000196132	MYT1	myelin transcription factor 1 [Source:HGNC Symbol;Acc:HGNC:7622]	4661	119.122	2.204	0.474501	4.64488	3.4028e-06	5.01192e-05	up-regulated
ENSG00000196136	SERPINA3	serpin family A member 3 [Source:HGNC Symbol;Acc:HGNC:16]	12	19016	3.60273	0.59123	6.09362	1.10385e-09	3.37247e-08	up-regulated
ENSG00000196169	KIF19	kinesin family member 19 [Source:HGNC Symbol;Acc:HGNC:26735]	124602	191.889	2.49652	0.577465	4.32323	1.53759e-05	0.000186414	up-regulated
ENSG00000196218	RYR1	ryanodine receptor 1 [Source:HGNC Symbol;Acc:HGNC:10483]	6261	1397.17	2.06187	0.280787	7.34318	2.08584e-13	1.00599e-11	up-regulated
ENSG00000196273	LINC00523	long intergenic non-protein coding RNA 523 [Source:HGNC Symbol;Acc:HGNC:20117]	283601	2.90511	3.17645	0.81495	3.89772	9.71022e-05	0.000904466	up-regulated
ENSG00000196337	CGB7	chorionic gonadotropin subunit beta 7 [Source:HGNC Symbol;Acc:HGNC:16451]	94027	129.079	-2.71232	0.657144	-4.12744	3.66818e-05	0.000398506	down-regulated
ENSG00000196338	NLGN3	neuroligin 3 [Source:HGNC Symbol;Acc:HGNC:14289]	54413	1930.47	3.91375	0.366799	10.67	1.40605e-26	2.22978e-24	up-regulated
ENSG00000196361	ELAVL3	ELAV like RNA binding protein 3 [Source:HGNC Symbol;Acc:HGNC:3314]	1995	566.757	4.3047	0.7943	5.41949	5.97681e-08	1.32047e-06	up-regulated
ENSG00000196376	SLC35F1	solute carrier family 35 member F1 [Source:HGNC Symbol;Acc:HGNC:21483]	222553	713.57	5.33946	0.645188	8.27583	1.27561e-16	8.87379e-15	up-regulated
ENSG00000196482	ESRRG	estrogen related receptor gamma [Source:HGNC Symbol;Acc:HGNC:3474]	2104	79.0997	2.52925	0.460095	5.49722	3.85822e-08	8.8751e-07	up-regulated
ENSG00000196517	SLC6A9	solute carrier family 6 member 9 [Source:HGNC Symbol;Acc:HGNC:11056]	6536	1209.58	2.54162	0.299348	8.4905	2.05754e-17	1.52789e-15	up-regulated
ENSG00000196542	SPTSSB	serine palmitoyltransferase small subunit B [Source:HGNC Symbol;Acc:HGNC:24045]	165679	292.098	3.69883	0.634465	5.82984	5.54802e-09	1.50355e-07	up-regulated
ENSG00000196767	POU3F4	POU class 3 homeobox 4 [Source:HGNC Symbol;Acc:HGNC:9217]	5456	42.45	5.28358	1.13832	4.64156	3.45794e-06	5.07915e-05	up-regulated
ENSG00000197057	DTHD1	death domain containing 1 [Source:HGNC Symbol;Acc:HGNC:37261]	401124	108.956	2.67835	0.666199	4.02035	5.81116e-05	0.000585907	up-regulated
ENSG00000197168	NEK5	NIMA related kinase 5 [Source:HGNC Symbol;Acc:HGNC:7748]	341676	318.833	2.24541	0.512549	4.38087	1.18207e-05	0.000148159	up-regulated
ENSG00000197177	ADGRA1	adhesion G protein-coupled receptor A1 [Source:HGNC Symbol;Acc:HGNC:13838]	84435	178.498	5.19029	0.683883	7.58945	3.21278e-14	1.69833e-12	up-regulated
ENSG00000197182	MIRLET7BHG	MIRLET7B host gene [Source:HGNC Symbol;Acc:HGNC:37189]	400931	672.599	-2.10248	0.437652	-4.804	1.55524e-06	2.50135e-05	down-regulated
ENSG00000197208	SLC22A4	solute carrier family 22 member 4 [Source:HGNC Symbol;Acc:HGNC:10968]	6583	465.289	3.18244	0.37507	8.48493	2.15858e-17	1.59029e-15	up-regulated
ENSG00000197299	BLM	BLM RecQ like helicase [Source:HGNC Symbol;Acc:HGNC:1058]	641	469.247	2.31688	0.422813	5.47967	4.26112e-08	9.73013e-07	up-regulated
ENSG00000197301	HMGA2-AS1	HMGA2 antisense RNA 1 [Source:HGNC Symbol;Acc:HGNC:53973]	100129940	86.0688	-3.28151	0.704638	-4.65702	3.2082e-06	4.75336e-05	down-regulated
ENSG00000197322	TMEM132E-DT	TMEM132E divergent transcript [Source:HGNC Symbol;Acc:HGNC:34412]	400591	13.9088	4.43524	0.919124	4.82551	1.39643e-06	2.27032e-05	up-regulated
ENSG00000197380	DACT3	dishevelled binding antagonist of beta catenin 3 [Source:HGNC Symbol;Acc:HGNC:30745]	147906	459.041	2.53119	0.376721	6.71901	1.82964e-11	6.93079e-10	up-regulated
ENSG00000197430	OPALIN	oligodendrocytic myelin paranodal and inner loop protein [Source:HGNC Symbol;Acc:HGNC:20707]	93377	89.7904	7.69361	1.15977	6.63375	3.27275e-11	1.20676e-09	up-regulated
ENSG00000197557	TTC30A	tetratricopeptide repeat domain 30A [Source:HGNC Symbol;Acc:HGNC:25853]	92104	485.094	2.3347	0.25532	9.14421	6.00658e-20	5.537e-18	up-regulated
ENSG00000197580	BCO2	beta-carotene oxygenase 2 [Source:HGNC Symbol;Acc:HGNC:18503]	83875	238.651	2.19024	0.425716	5.14484	2.67743e-07	5.10336e-06	up-regulated
ENSG00000197705	KLHL14	kelch like family member 14 [Source:HGNC Symbol;Acc:HGNC:29266]	57565	119.438	-3.8166	0.661036	-5.77367	7.75645e-09	2.0472e-07	down-regulated
ENSG00000197748	CFAP43	cilia and flagella associated protein 43 [Source:HGNC Symbol;Acc:HGNC:26684]	80217	522.658	3.21492	0.598555	5.37114	7.82399e-08	1.69231e-06	up-regulated
ENSG00000197959	DNM3	dynamin 3 [Source:HGNC Symbol;Acc:HGNC:29125]	26052	413.907	2.2254	0.291516	7.63391	2.27737e-14	1.21761e-12	up-regulated
ENSG00000197971	MBP	myelin basic protein [Source:HGNC Symbol;Acc:HGNC:6925]	4155	4392.95	2.02222	0.425467	4.75293	2.00486e-06	3.11861e-05	up-regulated
ENSG00000198208	RPS6KL1	ribosomal protein S6 kinase like 1 [Source:HGNC Symbol;Acc:HGNC:20222]	83694	200.126	2.32168	0.503126	4.61451	3.94026e-06	5.68936e-05	up-regulated
ENSG00000198216	CACNA1E	calcium voltage-gated channel subunit alpha1 E [Source:HGNC Symbol;Acc:HGNC:1392]	777	111.466	3.83331	0.63366	6.04947	1.45322e-09	4.37555e-08	up-regulated
ENSG00000198300	PEG3	paternally expressed 3 [Source:HGNC Symbol;Acc:HGNC:8826]	5178	1992.46	2.14761	0.406856	5.27855	1.30207e-07	2.66874e-06	up-regulated
ENSG00000198491		novel transcript	101929106	132.252	7.54475	0.621107	12.1473	5.93128e-34	1.54156e-31	up-regulated
ENSG00000198732	SMOC1	SPARC related modular calcium binding 1 [Source:HGNC Symbol;Acc:HGNC:20318]	64093	2498.12	4.88258	0.662327	7.37185	1.68271e-13	8.16824e-12	up-regulated
ENSG00000198739	LRRTM3	leucine rich repeat transmembrane neuronal 3 [Source:HGNC Symbol;Acc:HGNC:19410]	347731	170.468	3.92919	0.615728	6.38138	1.75502e-10	5.91741e-09	up-regulated
ENSG00000198753	PLXNB3	plexin B3 [Source:HGNC Symbol;Acc:HGNC:9105]	5365	1491.59	2.28736	0.380791	6.00687	1.89144e-09	5.56518e-08	up-regulated
ENSG00000198756	COLGALT2	collagen beta(1-O)galactosyltransferase 2 [Source:HGNC Symbol;Acc:HGNC:16790]	23127	700.307	3.97478	0.390538	10.1777	2.49334e-24	3.35668e-22	up-regulated
ENSG00000198780	FAM169A	family with sequence similarity 169 member A [Source:HGNC Symbol;Acc:HGNC:29138]	26049	1400.15	2.3205	0.500897	4.63268	3.6096e-06	5.26472e-05	up-regulated
ENSG00000198795	ZNF521	zinc finger protein 521 [Source:HGNC Symbol;Acc:HGNC:24605]	25925	656.924	2.31946	0.527913	4.39363	1.11475e-05	0.0001409	up-regulated
ENSG00000198797	BRINP2	BMP/retinoic acid inducible neural specific 2 [Source:HGNC Symbol;Acc:HGNC:13746]	57795	157.578	4.35454	0.549473	7.92494	2.28248e-15	1.3646e-13	up-regulated
ENSG00000198807	PAX9	paired box 9 [Source:HGNC Symbol;Acc:HGNC:8623]	5083	44.826	-2.62428	0.649985	-4.03744	5.40367e-05	0.000550008	down-regulated
ENSG00000198838	RYR3	ryanodine receptor 3 [Source:HGNC Symbol;Acc:HGNC:10485]	6263	557.647	2.66656	0.497894	5.35568	8.52354e-08	1.82333e-06	up-regulated
ENSG00000198842	STYXL2	serine/threonine/tyrosine interacting like 2 [Source:HGNC Symbol;Acc:HGNC:25034]	92235	29.4861	2.95632	0.451247	6.55145	5.69821e-11	2.03688e-09	up-regulated
ENSG00000198846	TOX	thymocyte selection associated high mobility group box [Source:HGNC Symbol;Acc:HGNC:18988]	9760	613.113	2.0457	0.37242	5.49299	3.95182e-08	9.07366e-07	up-regulated
ENSG00000198892	SHISA4	shisa family member 4 [Source:HGNC Symbol;Acc:HGNC:27139]	149345	1092.57	2.90457	0.488665	5.94388	2.78351e-09	7.98282e-08	up-regulated
ENSG00000198910	L1CAM	L1 cell adhesion molecule [Source:HGNC Symbol;Acc:HGNC:6470]	3897	461.82	2.4609	0.624277	3.94199	8.0808e-05	0.000772891	up-regulated
ENSG00000198914	POU3F3	POU class 3 homeobox 3 [Source:HGNC Symbol;Acc:HGNC:9216]	5455	1122.41	4.17165	0.998552	4.1777	2.94471e-05	0.000329868	up-regulated
ENSG00000198915	RASGEF1A	RasGEF domain family member 1A [Source:HGNC Symbol;Acc:HGNC:24246]	221002	675.112	2.15799	0.351648	6.1368	8.41985e-10	2.60862e-08	up-regulated
ENSG00000198929	NOS1AP	nitric oxide synthase 1 adaptor protein [Source:HGNC Symbol;Acc:HGNC:16859]	9722	245.059	2.87573	0.368003	7.81443	5.52128e-15	3.18888e-13	up-regulated
ENSG00000198944	SOWAHA	sosondowah ankyrin repeat domain family member A [Source:HGNC Symbol;Acc:HGNC:27033]	134548	135.544	4.10803	0.50689	8.10438	5.3016e-16	3.44475e-14	up-regulated
ENSG00000198947	DMD	dystrophin [Source:HGNC Symbol;Acc:HGNC:2928]	1756	2048.11	2.05302	0.44989	4.56338	5.03376e-06	7.04802e-05	up-regulated
ENSG00000198948	MFAP3L	microfibril associated protein 3 like [Source:HGNC Symbol;Acc:HGNC:29083]	9848	780.981	4.32966	0.307988	14.0579	6.89044e-45	3.96741e-42	up-regulated
ENSG00000198948	MFAP3L	microfibril associated protein 3 like [Source:HGNC Symbol;Acc:HGNC:29083]	101928198	780.981	4.32966	0.307988	14.0579	6.89044e-45	3.96741e-42	up-regulated
ENSG00000198976	MIR429	microRNA 429 [Source:HGNC Symbol;Acc:HGNC:13784]	554210	31.7878	-2.87685	0.724935	-3.96843	7.23485e-05	0.000704254	down-regulated
ENSG00000199293	SNORA21	small nucleolar RNA, H/ACA box 21 [Source:HGNC Symbol;Acc:HGNC:32611]	NA	13.6138	-2.02964	0.446199	-4.54872	5.39734e-06	7.48706e-05	down-regulated
ENSG00000199645	RNU6-1330P	RNA, U6 small nuclear 1330, pseudogene [Source:HGNC Symbol;Acc:HGNC:48293]	NA	66.3862	2.29968	0.489057	4.70227	2.57283e-06	3.91107e-05	up-regulated
ENSG00000199899		Y RNA [Source:RFAM;Acc:RF00019]	NA	19.1577	6.35546	0.705677	9.00619	2.13341e-19	1.88314e-17	up-regulated
ENSG00000200879	SNORD14E	small nucleolar RNA, C/D box 14E [Source:HGNC Symbol;Acc:HGNC:30354]	85391	26.7645	-2.88439	0.706231	-4.0842	4.42286e-05	0.000465364	down-regulated
ENSG00000203472		novel transcript, antisense to CHST6	NA	175.797	4.91133	0.529456	9.27619	1.75654e-20	1.71646e-18	up-regulated
ENSG00000203666	EFCAB2	EF-hand calcium binding domain 2 [Source:HGNC Symbol;Acc:HGNC:28166]	84288	545.175	2.01445	0.241109	8.35492	6.54782e-17	4.65007e-15	up-regulated
ENSG00000203778	FAM229B	family with sequence similarity 229 member B [Source:HGNC Symbol;Acc:HGNC:33858]	619208	1018.45	2.02448	0.435134	4.65253	3.27885e-06	4.8542e-05	up-regulated
ENSG00000203877	RIPPLY2	ripply transcriptional repressor 2 [Source:HGNC Symbol;Acc:HGNC:21390]	134701	18.6126	2.96965	0.582663	5.09668	3.45656e-07	6.44249e-06	up-regulated
ENSG00000203952	CCDC160	coiled-coil domain containing 160 [Source:HGNC Symbol;Acc:HGNC:37286]	347475	115.874	5.03981	0.555001	9.08072	1.07861e-19	9.82193e-18	up-regulated
ENSG00000203963	C1orf141	chromosome 1 open reading frame 141 [Source:HGNC Symbol;Acc:HGNC:32044]	400757	14.4385	3.95848	0.882531	4.48537	7.27858e-06	9.77074e-05	up-regulated
ENSG00000204025	TRPC5OS	TRPC5 opposite strand [Source:HGNC Symbol;Acc:HGNC:40593]	100329135	9.28544	3.34539	0.590594	5.66444	1.47502e-08	3.70001e-07	up-regulated
ENSG00000204052	LRRC73	leucine rich repeat containing 73 [Source:HGNC Symbol;Acc:HGNC:21375]	221424	87.3555	2.13083	0.427571	4.98356	6.24245e-07	1.09685e-05	up-regulated
ENSG00000204071	TCEAL6	transcription elongation factor A like 6 [Source:HGNC Symbol;Acc:HGNC:24553]	158931	401.647	4.54958	0.594072	7.6583	1.8841e-14	1.0204e-12	up-regulated
ENSG00000204128	C2orf72	chromosome 2 open reading frame 72 [Source:HGNC Symbol;Acc:HGNC:27418]	257407	766.235	4.75002	0.44083	10.7752	4.51015e-27	7.43599e-25	up-regulated
ENSG00000204241	LINC02731	long intergenic non-protein coding RNA 2731 [Source:HGNC Symbol;Acc:HGNC:54248]	100128239	308.665	3.13797	0.528932	5.93265	2.98076e-09	8.48995e-08	up-regulated
ENSG00000204277	LINC01993	long intergenic non-protein coding RNA 1993 [Source:HGNC Symbol;Acc:HGNC:52826]	100996291	89.0312	-3.15875	0.787501	-4.01111	6.04348e-05	0.000604032	down-regulated
ENSG00000204347	BTBD17	BTB domain containing 17 [Source:HGNC Symbol;Acc:HGNC:33758]	388419	48.8244	4.37361	0.65595	6.66759	2.60031e-11	9.66426e-10	up-regulated
ENSG00000204556		zinc-finger pseudogene	NA	15.6868	2.04831	0.386216	5.30355	1.13574e-07	2.36276e-06	up-regulated
ENSG00000204584		novel transcript, antisense to TAC4	NA	32.1225	-2.50712	0.491552	-5.10041	3.38918e-07	6.33268e-06	down-regulated
ENSG00000204616	TRIM31	tripartite motif containing 31 [Source:HGNC Symbol;Acc:HGNC:16289]	11074	22.8026	-2.57319	0.512195	-5.02385	5.06458e-07	9.07792e-06	down-regulated
ENSG00000204655	MOG	myelin oligodendrocyte glycoprotein [Source:HGNC Symbol;Acc:HGNC:7197]	4340	148.034	6.25892	0.888356	7.04551	1.84787e-12	7.83222e-11	up-regulated
ENSG00000204666		novel transcript, sense overlapping ZNF473	400710	44.3539	3.23971	0.346496	9.34992	8.77128e-21	8.96923e-19	up-regulated
ENSG00000204677	FAM153CP	family with sequence similarity 153 member C, pseudogene [Source:HGNC Symbol;Acc:HGNC:33936]	653316	172.012	-2.84071	0.637012	-4.45943	8.21792e-06	0.000108373	down-regulated
ENSG00000204815	ODAD4	outer dynein arm docking complex subunit 4 [Source:HGNC Symbol;Acc:HGNC:25280]	83538	190.304	2.18226	0.396954	5.49751	3.85193e-08	8.86606e-07	up-regulated
ENSG00000204832	ST8SIA6-AS1	ST8SIA6 antisense RNA 1 [Source:HGNC Symbol;Acc:HGNC:44880]	100128098	54.3081	-4.397	0.956302	-4.59792	4.2673e-06	6.10039e-05	down-regulated
ENSG00000204850		novel transcript, antisense to PPP5D1	NA	241.796	2.68491	0.482373	5.56604	2.60589e-08	6.2438e-07	up-regulated
ENSG00000204851	PNMA8B	PNMA family member 8B [Source:HGNC Symbol;Acc:HGNC:29206]	57469	728.653	2.74866	0.430669	6.3823	1.74451e-10	5.89259e-09	up-regulated
ENSG00000204934	ATP6V0E2-AS1	ATP6V0E2 antisense RNA 1 [Source:HGNC Symbol;Acc:HGNC:44180]	401431	1001.88	2.13878	0.351803	6.07948	1.20572e-09	3.66574e-08	up-regulated
ENSG00000204956	PCDHGA1	protocadherin gamma subfamily A, 1 [Source:HGNC Symbol;Acc:HGNC:8696]	56114	15903.3	2.24541	0.423109	5.30693	1.11486e-07	2.32708e-06	up-regulated
ENSG00000204961	PCDHA9	protocadherin alpha 9 [Source:HGNC Symbol;Acc:HGNC:8675]	9752	965.224	2.48978	0.540135	4.60955	4.03549e-06	5.81117e-05	up-regulated
ENSG00000204962	PCDHA8	protocadherin alpha 8 [Source:HGNC Symbol;Acc:HGNC:8674]	56140	955.596	2.49748	0.546631	4.56887	4.90361e-06	6.88382e-05	up-regulated
ENSG00000204963	PCDHA7	protocadherin alpha 7 [Source:HGNC Symbol;Acc:HGNC:8673]	56141	955.131	2.47898	0.551681	4.49351	7.00589e-06	9.45897e-05	up-regulated
ENSG00000204965	PCDHA5	protocadherin alpha 5 [Source:HGNC Symbol;Acc:HGNC:8671]	56143	965.815	2.47221	0.542252	4.55914	5.13624e-06	7.18345e-05	up-regulated
ENSG00000204967	PCDHA4	protocadherin alpha 4 [Source:HGNC Symbol;Acc:HGNC:8670]	56144	1058.87	2.31244	0.554446	4.17073	3.03622e-05	0.000338901	up-regulated
ENSG00000204969	PCDHA2	protocadherin alpha 2 [Source:HGNC Symbol;Acc:HGNC:8668]	56146	985.63	2.47742	0.548455	4.51709	6.26948e-06	8.54174e-05	up-regulated
ENSG00000204970	PCDHA1	protocadherin alpha 1 [Source:HGNC Symbol;Acc:HGNC:8663]	56147	1002.03	2.57114	0.555498	4.62853	3.68265e-06	5.36056e-05	up-regulated
ENSG00000205084	TMEM231	transmembrane protein 231 [Source:HGNC Symbol;Acc:HGNC:37234]	79583	1068.27	2.27	0.250881	9.04811	1.45468e-19	1.30873e-17	up-regulated
ENSG00000205089	CCNI2	cyclin I family member 2 [Source:HGNC Symbol;Acc:HGNC:33869]	645121	665.888	3.40455	0.339917	10.0158	1.29868e-23	1.63102e-21	up-regulated
ENSG00000205129	C4orf47	chromosome 4 open reading frame 47 [Source:HGNC Symbol;Acc:HGNC:34346]	441054	142.397	2.29341	0.385166	5.95435	2.61113e-09	7.53464e-08	up-regulated
ENSG00000205364	MT1M	metallothionein 1M [Source:HGNC Symbol;Acc:HGNC:14296]	4499	933.806	2.18576	0.377163	5.79527	6.82114e-09	1.81959e-07	up-regulated
ENSG00000205436	EXOC3L4	exocyst complex component 3 like 4 [Source:HGNC Symbol;Acc:HGNC:20120]	91828	36.5914	-3.21691	0.810628	-3.96841	7.23523e-05	0.000704254	down-regulated
ENSG00000205549	C9orf92	chromosome 9 open reading frame 92 [Source:HGNC Symbol;Acc:HGNC:19054]	100129385	106.096	-2.21488	0.534808	-4.14145	3.45112e-05	0.000378492	down-regulated
ENSG00000205683	DPF3	double PHD fingers 3 [Source:HGNC Symbol;Acc:HGNC:17427]	8110	321.145	3.33546	0.444649	7.50133	6.31724e-14	3.21235e-12	up-regulated
ENSG00000205704	SMIM45	small integral membrane protein 45 [Source:HGNC Symbol;Acc:HGNC:27930]	339674	337.396	4.88491	0.726366	6.72514	1.75423e-11	6.67212e-10	up-regulated
ENSG00000205835	GMNC	geminin coiled-coil domain containing [Source:HGNC Symbol;Acc:HGNC:40049]	647309	176.928	8.38627	0.534296	15.6959	1.61315e-55	1.63172e-52	up-regulated
ENSG00000205927	OLIG2	oligodendrocyte transcription factor 2 [Source:HGNC Symbol;Acc:HGNC:9398]	10215	436.164	7.61429	0.653437	11.6527	2.22337e-31	4.83789e-29	up-regulated
ENSG00000205929	C21orf62	chromosome 21 open reading frame 62 [Source:HGNC Symbol;Acc:HGNC:1305]	56245	670.805	3.47273	0.783629	4.4316	9.35357e-06	0.000121256	up-regulated
ENSG00000206113	CFAP99	cilia and flagella associated protein 99 [Source:HGNC Symbol;Acc:HGNC:51180]	402160	149.618	4.12604	0.640079	6.44615	1.14729e-10	3.9393e-09	up-regulated
ENSG00000206129		novel transcript	642484	11.723	3.04028	0.592372	5.13239	2.86093e-07	5.42416e-06	up-regulated
ENSG00000206145	P2RX6P	purinergic receptor P2X 6 pseudogene [Source:HGNC Symbol;Acc:HGNC:34076]	NA	12.4795	3.82931	0.716481	5.3446	9.06153e-08	1.92363e-06	up-regulated
ENSG00000206384	COL6A6	collagen type VI alpha 6 chain [Source:HGNC Symbol;Acc:HGNC:27023]	131873	148.94	-3.61515	0.751608	-4.80989	1.51013e-06	2.43612e-05	down-regulated
ENSG00000206432	TMEM200C	transmembrane protein 200C [Source:HGNC Symbol;Acc:HGNC:37208]	645369	542.699	2.79263	0.437172	6.38795	1.68125e-10	5.68921e-09	up-regulated
ENSG00000206630	SNORD60	small nucleolar RNA, C/D box 60 [Source:HGNC Symbol;Acc:HGNC:10217]	26788	35.916	-2.13432	0.466006	-4.58003	4.64907e-06	6.5783e-05	down-regulated
ENSG00000207118	SNORD14D	small nucleolar RNA, C/D box 14D [Source:HGNC Symbol;Acc:HGNC:30353]	85390	28.625	-2.17157	0.493444	-4.40084	1.07831e-05	0.000137129	down-regulated
ENSG00000207421	SNORD38B	small nucleolar RNA, C/D box 38B [Source:HGNC Symbol;Acc:HGNC:30356]	NA	37.9549	-2.13971	0.405225	-5.2803	1.28972e-07	2.64633e-06	down-regulated
ENSG00000207547	MIR25	microRNA 25 [Source:HGNC Symbol;Acc:HGNC:31609]	407014	41.4368	-2.02323	0.508435	-3.97933	6.91109e-05	0.000677993	down-regulated
ENSG00000207721	MIR186	microRNA 186 [Source:HGNC Symbol;Acc:HGNC:31557]	406962	37.1077	-2.01326	0.489854	-4.10993	3.95787e-05	0.000424677	down-regulated
ENSG00000212172	RNU1-149P	RNA, U1 small nuclear 149, pseudogene [Source:HGNC Symbol;Acc:HGNC:48491]	NA	17.0157	2.76214	0.561171	4.9221	8.56205e-07	1.45921e-05	up-regulated
ENSG00000212460	RNU6-460P	RNA, U6 small nuclear 460, pseudogene [Source:HGNC Symbol;Acc:HGNC:47423]	NA	3.03498	4.9434	0.94421	5.23548	1.64553e-07	3.29687e-06	up-regulated
ENSG00000212664		ribosomal protein L17 (RPL17) pseudogene	NA	19.2244	-2.4576	0.581487	-4.22641	2.37449e-05	0.000272349	down-regulated
ENSG00000213085	CFAP45	cilia and flagella associated protein 45 [Source:HGNC Symbol;Acc:HGNC:17229]	25790	405.125	5.32094	0.351928	15.1194	1.20633e-51	1.04996e-48	up-regulated
ENSG00000213144		PDGFA associated protein 1 (PDAP1) pseudogene	NA	176.201	3.96477	0.407289	9.73453	2.14811e-22	2.45459e-20	up-regulated
ENSG00000213225	NOC2LP1	NOC2 like nucleolar associated transcriptional repressor pseudogene 1 [Source:HGNC Symbol;Acc:HGNC:52285]	NA	13.2888	2.37658	0.589236	4.03331	5.49956e-05	0.000558098	up-regulated
ENSG00000213355	CNN2P8	calponin 2 pseudogene 8 [Source:HGNC Symbol;Acc:HGNC:39533]	NA	23.6825	5.8777	1.0622	5.53352	3.13873e-08	7.38341e-07	up-regulated
ENSG00000213442	RPL18AP3	ribosomal protein L18a pseudogene 3 [Source:HGNC Symbol;Acc:HGNC:31387]	NA	236.697	-2.09463	0.426789	-4.90788	9.2068e-07	1.55143e-05	down-regulated
ENSG00000213553	RPLP0P6	ribosomal protein lateral stalk subunit P0 pseudogene 6 [Source:HGNC Symbol;Acc:HGNC:36404]	NA	314.412	-2.21067	0.500077	-4.42065	9.84053e-06	0.000126822	down-regulated
ENSG00000213598		ribosomal protein L31 (RPL31) pseudogene	NA	21.3136	-2.81701	0.673944	-4.17989	2.91647e-05	0.000327194	down-regulated
ENSG00000213612	FAM220CP	family with sequence similarity 220 member C, pseudogene [Source:HGNC Symbol;Acc:HGNC:43640]	NA	6.93986	2.47162	0.636092	3.88563	0.000102063	0.000944566	up-regulated
ENSG00000213694	S1PR3	sphingosine-1-phosphate receptor 3 [Source:HGNC Symbol;Acc:HGNC:3167]	1903	3515.24	2.18917	0.555089	3.94381	8.01959e-05	0.000768606	up-regulated
ENSG00000213731	RAB5CP1	RAB5C, member RAS oncogene family pseudogene 1 [Source:HGNC Symbol;Acc:HGNC:45104]	NA	11.092	-3.89831	0.968554	-4.02487	5.70056e-05	0.000575842	down-regulated
ENSG00000213901	SLC23A3	solute carrier family 23 member 3 [Source:HGNC Symbol;Acc:HGNC:20601]	151295	50.431	-2.2715	0.373745	-6.07767	1.21941e-09	3.70136e-08	down-regulated
ENSG00000213938	SEPHS1P6	selenophosphate synthetase 1 pseudogene 6 [Source:HGNC Symbol;Acc:HGNC:42168]	NA	15.5463	3.1001	0.546514	5.67249	1.40737e-08	3.54217e-07	up-regulated
ENSG00000214263	RPSAP53	ribosomal protein SA pseudogene 53 [Source:HGNC Symbol;Acc:HGNC:36641]	NA	4.77931	5.25906	1.02821	5.11475	3.14162e-07	5.90252e-06	up-regulated
ENSG00000214338	SOGA3	SOGA family member 3 [Source:HGNC Symbol;Acc:HGNC:21494]	387104	349.169	3.39333	0.314196	10.8	3.441e-27	5.72369e-25	up-regulated
ENSG00000214447	FAM187A	family with sequence similarity 187 member A [Source:HGNC Symbol;Acc:HGNC:35153]	100528020	902.241	3.88088	0.231929	16.733	7.5292e-63	1.22516e-59	up-regulated
ENSG00000214548	MEG3	maternally expressed 3 [Source:HGNC Symbol;Acc:HGNC:14575]	55384	6863.23	-2.00383	0.399522	-5.01556	5.2878e-07	9.43736e-06	down-regulated
ENSG00000214575	CPEB1	cytoplasmic polyadenylation element binding protein 1 [Source:HGNC Symbol;Acc:HGNC:21744]	64506	343.528	2.40906	0.470834	5.11658	3.1113e-07	5.85144e-06	up-regulated
ENSG00000214688	C10orf105	chromosome 10 open reading frame 105 [Source:HGNC Symbol;Acc:HGNC:20304]	414152	664.727	4.14976	0.741561	5.59598	2.19377e-08	5.32797e-07	up-regulated
ENSG00000214822	KRT16P3	keratin 16 pseudogene 3 [Source:HGNC Symbol;Acc:HGNC:37808]	644945	89.9031	-4.23278	0.881036	-4.80432	1.55279e-06	2.49849e-05	down-regulated
ENSG00000214944	ARHGEF28	Rho guanine nucleotide exchange factor 28 [Source:HGNC Symbol;Acc:HGNC:30322]	64283	739.057	-2.07106	0.47257	-4.38254	1.17303e-05	0.000147272	down-regulated
ENSG00000215030	RPL13P12	ribosomal protein L13 pseudogene 12 [Source:HGNC Symbol;Acc:HGNC:35701]	NA	2240.94	-5.26074	0.65671	-8.01074	1.14016e-15	7.1357e-14	down-regulated
ENSG00000215217	C5orf49	chromosome 5 open reading frame 49 [Source:HGNC Symbol;Acc:HGNC:27028]	134121	868.977	4.85239	0.521862	9.29823	1.42803e-20	1.41017e-18	up-regulated
ENSG00000215417	MIR17HG	miR-17-92a-1 cluster host gene [Source:HGNC Symbol;Acc:HGNC:23564]	407975	54.6214	-2.01544	0.400712	-5.02965	4.91388e-07	8.84592e-06	down-regulated
ENSG00000215845	TSTD1	thiosulfate sulfurtransferase like domain containing 1 [Source:HGNC Symbol;Acc:HGNC:35410]	100131187	895.285	-2.00117	0.479864	-4.17028	3.04222e-05	0.000339268	down-regulated
ENSG00000215912	TTC34	tetratricopeptide repeat domain 34 [Source:HGNC Symbol;Acc:HGNC:34297]	100287898	228.288	2.29341	0.526795	4.35352	1.33971e-05	0.000165151	up-regulated
ENSG00000216866	RPS2P55	ribosomal protein S2 pseudogene 55 [Source:HGNC Symbol;Acc:HGNC:36140]	NA	20.1791	-2.29793	0.545434	-4.21304	2.5196e-05	0.000287321	down-regulated
ENSG00000216901	ZNF603P	zinc finger protein 603, pseudogene [Source:HGNC Symbol;Acc:HGNC:23322]	NA	11.6169	3.0409	0.714877	4.25375	2.10224e-05	0.000245181	up-regulated
ENSG00000216906		multimerin 2 (MMRN2) pseudogene	NA	8.42517	2.03035	0.493167	4.11696	3.839e-05	0.000414537	up-regulated
ENSG00000217027	TPT1P4	TPT1 pseudogene 4 [Source:HGNC Symbol;Acc:HGNC:49298]	NA	16.1677	-2.22172	0.47156	-4.71142	2.45994e-06	3.75318e-05	down-regulated
ENSG00000217801		protein tyrosine phosphatase family pseudogene	100288175	79.687	-2.70758	0.370814	-7.30171	2.84141e-13	1.33933e-11	down-regulated
ENSG00000218227		ribosomal protein L19 (RPL19) pseudogene	NA	70.3975	-2.3748	0.480547	-4.94186	7.73796e-07	1.33089e-05	down-regulated
ENSG00000218418		Rho GTPase activating protein 21 (ARHGAP21) pseudogene	NA	5.87376	2.30892	0.522341	4.42034	9.85449e-06	0.000126958	up-regulated
ENSG00000221500	SNORD100	small nucleolar RNA, C/D box 100 [Source:HGNC Symbol;Acc:HGNC:32763]	594838	15.2917	-2.0372	0.463971	-4.39079	1.12938e-05	0.000142558	down-regulated
ENSG00000221818	EBF2	EBF transcription factor 2 [Source:HGNC Symbol;Acc:HGNC:19090]	64641	122.737	-2.89043	0.559962	-5.16183	2.44552e-07	4.70814e-06	down-regulated
ENSG00000221890	NPTXR	neuronal pentraxin receptor [Source:HGNC Symbol;Acc:HGNC:7954]	23467	1126.43	2.20432	0.374451	5.88682	3.93705e-09	1.09734e-07	up-regulated
ENSG00000221932	HEPN1	hepatocellular carcinoma, down-regulated 1 [Source:HGNC Symbol;Acc:HGNC:34400]	NA	2543.51	8.66083	0.713252	12.1427	6.27001e-34	1.60727e-31	up-regulated
ENSG00000223345	H2BP1	H2B histone pseudogene 1 [Source:HGNC Symbol;Acc:HGNC:20560]	337875	27.8689	3.00443	0.377492	7.95893	1.7353e-15	1.05431e-13	up-regulated
ENSG00000223349	KLF2P3	Kruppel like factor 2 pseudogene 3 [Source:HGNC Symbol;Acc:HGNC:49282]	NA	4.90396	3.35456	0.751099	4.46621	7.96183e-06	0.000105442	up-regulated
ENSG00000223350	IGLV9-49	immunoglobulin lambda variable 9-49 [Source:HGNC Symbol;Acc:HGNC:5933]	NA	39.5974	3.67121	0.785748	4.67224	2.97925e-06	4.45828e-05	up-regulated
ENSG00000223353		aldo-keto reductase family 1, member B1 (aldose reductase) (AKR1B1) pseudogene	NA	24.3781	2.11543	0.303612	6.96757	3.22472e-12	1.33653e-10	up-regulated
ENSG00000223393		novel transcript	NA	328.193	2.51853	0.372641	6.7586	1.39332e-11	5.3926e-10	up-regulated
ENSG00000223403	MEG9	maternally expressed 9 [Source:HGNC Symbol;Acc:HGNC:43874]	378881	92.8087	-2.28783	0.511171	-4.47567	7.61735e-06	0.000101599	down-regulated
ENSG00000223403	MEG9	maternally expressed 9 [Source:HGNC Symbol;Acc:HGNC:43874]	100507257	92.8087	-2.28783	0.511171	-4.47567	7.61735e-06	0.000101599	down-regulated
ENSG00000223504		novel transcript	102723883	2.7336	5.12219	0.994204	5.15205	2.57654e-07	4.93246e-06	up-regulated
ENSG00000223548	ACSL6-AS1	ACSL6 antisense RNA 1 [Source:HGNC Symbol;Acc:HGNC:40772]	NA	16.106	6.70926	0.798919	8.39792	4.54464e-17	3.25839e-15	up-regulated
ENSG00000223652	PRDM6-AS1	PRDM6 antisense RNA 1 [Source:HGNC Symbol;Acc:HGNC:55869]	NA	27.1162	-3.9301	0.725418	-5.4177	6.03703e-08	1.3322e-06	down-regulated
ENSG00000223675		novel transcript	NA	2.46606	4.2565	0.978902	4.34824	1.37232e-05	0.000168561	up-regulated
ENSG00000223751		novel transcript	NA	49.3898	-3.52658	0.8256	-4.27154	1.94131e-05	0.000228836	down-regulated
ENSG00000223774		novel transcript	NA	425.937	2.56165	0.554228	4.62201	3.80041e-06	5.51508e-05	up-regulated
ENSG00000223802	CERS1	ceramide synthase 1 [Source:HGNC Symbol;Acc:HGNC:14253]	10715	6626.82	5.8374	0.486073	12.0093	3.17478e-33	7.97446e-31	up-regulated
ENSG00000223814		novel transcript	NA	99.858	-3.37393	0.615956	-5.47755	4.31252e-08	9.82146e-07	down-regulated
ENSG00000223882	ABCC5-AS1	ABCC5 antisense RNA 1 [Source:HGNC Symbol;Acc:HGNC:40055]	100873982	8.76023	-3.85714	0.971557	-3.97006	7.18538e-05	0.00070013	down-regulated
ENSG00000223941	LINC01014	long intergenic non-protein coding RNA 1014 [Source:HGNC Symbol;Acc:HGNC:41353]	100874330	2.64398	4.35937	0.99764	4.36968	1.2443e-05	0.000154817	up-regulated
ENSG00000223949	ROR1-AS1	ROR1 antisense RNA 1 [Source:HGNC Symbol;Acc:HGNC:40508]	101927034	44.1285	-5.78212	1.18189	-4.89224	9.96926e-07	1.66641e-05	down-regulated
ENSG00000224063	CALCRL-AS1	CALCRL and TFPI antisense RNA 1 [Source:HGNC Symbol;Acc:HGNC:55863]	NA	74.0232	-2.10987	0.533849	-3.95219	7.74407e-05	0.000745639	down-regulated
ENSG00000224215	C10orf67-AS1	C10orf67 antisense RNA 1 [Source:HGNC Symbol;Acc:HGNC:55861]	105376453	20.9303	2.82167	0.517269	5.45494	4.899e-08	1.09878e-06	up-regulated
ENSG00000224239		novel transcript	NA	39.2238	-3.3459	0.851439	-3.9297	8.50526e-05	0.000807708	down-regulated
ENSG00000224243	SOX1-OT	SOX1 overlapping transcript [Source:HGNC Symbol;Acc:HGNC:42733]	100505996	94.7415	4.43007	0.68483	6.46886	9.87453e-11	3.41556e-09	up-regulated
ENSG00000224478		novel transcript	NA	9.60999	-2.9007	0.725939	-3.9958	6.44769e-05	0.000638885	down-regulated
ENSG00000224525		novel transcript, antisense to PLD5	NA	15.0167	4.34253	0.770188	5.63827	1.71763e-08	4.25441e-07	up-regulated
ENSG00000224594	RPL29P19	ribosomal protein L29 pseudogene 19 [Source:HGNC Symbol;Acc:HGNC:35508]	NA	20.1032	-2.37504	0.545801	-4.35148	1.35222e-05	0.000166479	down-regulated
ENSG00000224675		novel transcript	100144595	8.22575	3.26966	0.679332	4.81305	1.48642e-06	2.40098e-05	up-regulated
ENSG00000224691		novel transcript	NA	3.93943	-4.78204	1.21858	-3.92428	8.69908e-05	0.000823607	down-regulated
ENSG00000224729	PCOLCE-AS1	PCOLCE antisense RNA 1 [Source:HGNC Symbol;Acc:HGNC:40430]	100129845	1155.26	-2.18869	0.5592	-3.91398	9.07887e-05	0.000854163	down-regulated
ENSG00000224786	CETN4P	centrin 4, pseudogene [Source:HGNC Symbol;Acc:HGNC:35450]	NA	28.9167	2.31665	0.287376	8.06139	7.54296e-16	4.82569e-14	up-regulated
ENSG00000224789		novel transcript	NA	76.034	2.2024	0.325077	6.77502	1.2439e-11	4.84939e-10	up-regulated
ENSG00000224795	NTM-AS1	NTM antisense RNA 1 [Source:HGNC Symbol;Acc:HGNC:32293]	NA	17.4786	3.72141	0.502136	7.41116	1.25199e-13	6.16539e-12	up-regulated
ENSG00000224883		novel transcript, antisense to SEPT3	NA	124.799	4.2719	0.422223	10.1176	4.61485e-24	6.039e-22	up-regulated
ENSG00000224924	LINC00320	long intergenic non-protein coding RNA 320 [Source:HGNC Symbol;Acc:HGNC:19690]	387486	64.6532	6.3827	0.816614	7.81606	5.45018e-15	3.15268e-13	up-regulated
ENSG00000225028		novel transcript	NA	13.2158	-3.601	0.879385	-4.0949	4.22345e-05	0.000448572	down-regulated
ENSG00000225056		novel transcript	NA	5.35487	5.07839	0.864469	5.87458	4.23929e-09	1.17265e-07	up-regulated
ENSG00000225062	CATIP-AS1	CATIP antisense RNA 1 [Source:HGNC Symbol;Acc:HGNC:41080]	101928513	113.769	2.26005	0.444194	5.08799	3.61888e-07	6.70827e-06	up-regulated
ENSG00000225127	LINC00237	long intergenic non-protein coding RNA 237 [Source:HGNC Symbol;Acc:HGNC:38166]	105372556	41.366	3.74186	0.788619	4.74483	2.08683e-06	3.23134e-05	up-regulated
ENSG00000225140		novel transcript	101930421	17.9035	3.63812	0.578943	6.28408	3.29796e-10	1.07517e-08	up-regulated
ENSG00000225156		novel transcript	NA	68.3301	4.18054	0.732044	5.71079	1.12455e-08	2.88665e-07	up-regulated
ENSG00000225472	NFIB-AS1	NFIB antisense RNA 1 [Source:HGNC Symbol;Acc:HGNC:56058]	NA	38.5877	4.35721	0.557099	7.82124	5.23049e-15	3.0397e-13	up-regulated
ENSG00000225473	ATP13A4-AS1	ATP13A4 antisense RNA 1 [Source:HGNC Symbol;Acc:HGNC:41095]	NA	47.7333	5.8325	0.659078	8.84949	8.7921e-19	7.42783e-17	up-regulated
ENSG00000225606		novel transcript	NA	44.7097	2.87413	0.478292	6.00914	1.86507e-09	5.49192e-08	up-regulated
ENSG00000225647		novel transcript	NA	6.81487	4.40365	1.07957	4.07908	4.52135e-05	0.000474304	up-regulated
ENSG00000225670	CADM3-AS1	CADM3 antisense RNA 1 [Source:HGNC Symbol;Acc:HGNC:40812]	NA	5553.47	5.70671	0.465109	12.2696	1.31867e-34	3.65573e-32	up-regulated
ENSG00000225731	PDE9A-AS1	PDE9A antisense RNA 1 [Source:HGNC Symbol;Acc:HGNC:40440]	NA	9.89347	3.32934	0.72083	4.61875	3.86051e-06	5.58714e-05	up-regulated
ENSG00000225764	P3H2-AS1	P3H2 antisense RNA 1 [Source:HGNC Symbol;Acc:HGNC:40886]	NA	19.7148	3.04456	0.626894	4.85658	1.19429e-06	1.96906e-05	up-regulated
ENSG00000225774	SIRPAP1	signal regulatory protein alpha pseudogene 1 [Source:HGNC Symbol;Acc:HGNC:9663]	NA	40.9699	2.1809	0.501809	4.34608	1.38593e-05	0.000170065	up-regulated
ENSG00000225811		novel transcript	NA	28.3887	6.29679	0.611542	10.2966	7.30029e-25	1.03102e-22	up-regulated
ENSG00000225867		novel transcript	NA	9.48085	6.26894	0.832211	7.53287	4.96367e-14	2.55179e-12	up-regulated
ENSG00000225885		novel transcript, antisense to SAMD12	NA	22.5386	-3.89351	0.900775	-4.3224	1.54344e-05	0.000187063	down-regulated
ENSG00000225924	TAB2-AS1	TAB2 antisense RNA 1 [Source:HGNC Symbol;Acc:HGNC:53508]	105378049	157.463	6.06119	0.703831	8.61171	7.19769e-18	5.62381e-16	up-regulated
ENSG00000225937	PCA3	prostate cancer associated 3 [Source:HGNC Symbol;Acc:HGNC:8637]	50652	266.979	5.05099	0.473409	10.6694	1.41556e-26	2.23539e-24	up-regulated
ENSG00000225950	NTF4	neurotrophin 4 [Source:HGNC Symbol;Acc:HGNC:8024]	4909	669.29	-3.13892	0.808991	-3.88004	0.000104439	0.000962745	down-regulated
ENSG00000225953	SATB2-AS1	SATB2 antisense RNA 1 [Source:HGNC Symbol;Acc:HGNC:26490]	150538	91.7415	2.86817	0.495207	5.79186	6.96099e-09	1.85161e-07	up-regulated
ENSG00000226009	KCNIP2-AS1	KCNIP2 antisense RNA 1 [Source:HGNC Symbol;Acc:HGNC:48680]	NA	74.7263	2.07546	0.310692	6.68014	2.38719e-11	8.93428e-10	up-regulated
ENSG00000226012		novel transcript	NA	17.2149	-2.83319	0.508746	-5.56897	2.5625e-08	6.15164e-07	down-regulated
ENSG00000226026	RWDD3-DT	RWDD3 divergent transcript [Source:HGNC Symbol;Acc:HGNC:55839]	101928118	54.2318	2.25725	0.47032	4.79939	1.59148e-06	2.55087e-05	up-regulated
ENSG00000226053	LINC01776	long intergenic non-protein coding RNA 1776 [Source:HGNC Symbol;Acc:HGNC:52566]	729987	3.98961	3.99073	0.960288	4.15576	3.24204e-05	0.000358348	up-regulated
ENSG00000226083	SLC39A12-AS1	SLC39A12 antisense RNA 1 [Source:HGNC Symbol;Acc:HGNC:44881]	100129213	96.6843	6.5149	0.714353	9.12	7.51237e-20	6.87428e-18	up-regulated
ENSG00000226084		ribosomal protein L17 (RPL17) pseudogene	NA	66.7577	-2.06514	0.505129	-4.08835	4.34453e-05	0.00045867	down-regulated
ENSG00000226101	LINC02097	long intergenic non-protein coding RNA 2097 [Source:HGNC Symbol;Acc:HGNC:52948]	101928205	37.6123	2.67614	0.571041	4.68642	2.78023e-06	4.19399e-05	up-regulated
ENSG00000226252		novel transcript	NA	43.5939	2.18849	0.555962	3.9364	8.27146e-05	0.000789512	up-regulated
ENSG00000226287	TMEM191A	transmembrane protein 191A (pseudogene) [Source:HGNC Symbol;Acc:HGNC:25317]	84222	148.106	-2.1288	0.417877	-5.09431	3.50008e-07	6.51387e-06	down-regulated
ENSG00000226360	RPL10AP6	ribosomal protein L10a pseudogene 6 [Source:HGNC Symbol;Acc:HGNC:36504]	NA	104.967	-2.33752	0.515333	-4.53595	5.7345e-06	7.89332e-05	down-regulated
ENSG00000226396		ribosomal protein S14 (RPS14) pseudogene	NA	30.4314	-2.27384	0.42793	-5.31357	1.07498e-07	2.25139e-06	down-regulated
ENSG00000226413	OR8T1P	olfactory receptor family 8 subfamily T member 1 pseudogene [Source:HGNC Symbol;Acc:HGNC:19630]	NA	28.4485	3.83155	0.40517	9.45666	3.17928e-21	3.38033e-19	up-regulated
ENSG00000226472		tetraspanin family pseudogene	NA	146.523	2.03069	0.412969	4.91731	8.77411e-07	1.49128e-05	up-regulated
ENSG00000226476	LINC01748	long intergenic non-protein coding RNA 1748 [Source:HGNC Symbol;Acc:HGNC:52535]	105378763	32.9589	3.36159	0.570905	5.88818	3.90472e-09	1.09058e-07	up-regulated
ENSG00000226484		novel transcript, antisense to CXorf30	101928627	4.99074	4.05027	0.816795	4.95873	7.09546e-07	1.22975e-05	up-regulated
ENSG00000226690		novel protein	102725191	23.9804	5.0445	0.779361	6.47261	9.63254e-11	3.34112e-09	up-regulated
ENSG00000226822	LINC02785	long intergenic non-protein coding RNA 2785 [Source:HGNC Symbol;Acc:HGNC:54305]	NA	38.5219	-3.61221	0.629742	-5.73602	9.69257e-09	2.51738e-07	down-regulated
ENSG00000226859	LINC02051	long intergenic non-protein coding RNA 2051 [Source:HGNC Symbol;Acc:HGNC:52891]	NA	3.79106	4.91212	0.885921	5.54465	2.94549e-08	6.97709e-07	up-regulated
ENSG00000226919		novel transcript, antisense to RGS7	NA	16.8664	2.47871	0.605551	4.09332	4.25239e-05	0.000450722	up-regulated
ENSG00000227053	MUC12-AS1	MUC12 antisense RNA 1 [Source:HGNC Symbol;Acc:HGNC:40382]	102724094	49.6558	2.12713	0.529487	4.01734	5.88586e-05	0.000591526	up-regulated
ENSG00000227082	LINC02798	long intergenic non-protein coding RNA 2798 [Source:HGNC Symbol;Acc:HGNC:54323]	NA	109.287	2.91376	0.505899	5.75957	8.43299e-09	2.21483e-07	up-regulated
ENSG00000227157		novel transcript	NA	38.9446	7.15586	0.778139	9.19613	3.71086e-20	3.48951e-18	up-regulated
ENSG00000227158		ligand of numb-protein X 1, E3 ubiquitin protein ligase pseudogene	NA	6.86829	5.46754	0.790191	6.91926	4.54005e-12	1.84892e-10	up-regulated
ENSG00000227265	GXYLT1P7	GXYLT1 pseudogene 7 [Source:HGNC Symbol;Acc:HGNC:54735]	NA	6.82175	4.76658	0.969696	4.91554	8.85389e-07	1.50143e-05	up-regulated
ENSG00000227279		novel transcript, antisense to CDH2	NA	256.452	3.90148	0.419345	9.30376	1.35567e-20	1.3494e-18	up-regulated
ENSG00000227300	KRT16P2	keratin 16 pseudogene 2 [Source:HGNC Symbol;Acc:HGNC:37807]	NA	114.256	-2.72217	0.684283	-3.97813	6.94597e-05	0.000680701	down-regulated
ENSG00000227403	LINC01806	long intergenic non-protein coding RNA 1806 [Source:HGNC Symbol;Acc:HGNC:52599]	100996579	39.4834	-2.65448	0.67337	-3.94208	8.0777e-05	0.000772792	down-regulated
ENSG00000227407		novel transcript	NA	738.207	7.12446	0.50496	14.109	3.34449e-45	2.01888e-42	up-regulated
ENSG00000227455		novel transcript	NA	11.5125	4.8137	0.927913	5.18766	2.1295e-07	4.13804e-06	up-regulated
ENSG00000227487	NCAM1-AS1	NCAM1 antisense RNA1 [Source:HGNC Symbol;Acc:HGNC:48675]	NA	327.623	3.72957	0.471684	7.90691	2.63863e-15	1.5725e-13	up-regulated
ENSG00000227502	MROCKI	MARCKS cis regulating lncRNA promoter of cytokines and inflammation [Source:HGNC Symbol;Acc:HGNC:50323]	285758	48.6173	2.37679	0.547417	4.34183	1.41299e-05	0.000173101	up-regulated
ENSG00000227544	LINC03013	long intergenic non-protein coding RNA 3013 [Source:HGNC Symbol;Acc:HGNC:56140]	NA	67.3126	3.25539	0.368976	8.82277	1.11664e-18	9.30761e-17	up-regulated
ENSG00000227610	FRMPD3-AS1	FRMPD3 antisense RNA 1 [Source:HGNC Symbol;Acc:HGNC:41239]	100874122	17.0048	5.34589	0.716856	7.45742	8.82332e-14	4.40295e-12	up-regulated
ENSG00000227640	SOX21-AS1	SOX21 antisense divergent transcript 1 [Source:HGNC Symbol;Acc:HGNC:39807]	100507533	428.071	6.68654	0.546893	12.2264	2.24683e-34	6.04963e-32	up-regulated
ENSG00000227693	GSTM3P1	glutathione S-transferase mu 3 pseudogene 1 [Source:HGNC Symbol;Acc:HGNC:16606]	NA	5.58279	4.51142	0.810323	5.56744	2.5851e-08	6.19796e-07	up-regulated
ENSG00000227741		novel transcript	729867	1334.06	2.65706	0.478212	5.55623	2.75661e-08	6.55873e-07	up-regulated
ENSG00000227757		novel transcript	NA	164.066	6.89513	0.694535	9.92769	3.15476e-23	3.80872e-21	up-regulated
ENSG00000227954	TARID	TCF21 antisense RNA inducing promoter demethylation [Source:HGNC Symbol;Acc:HGNC:50506]	100507308	93.5936	-3.96563	0.89993	-4.4066	1.05006e-05	0.000134082	down-regulated
ENSG00000228058	LINC01736	long intergenic non-protein coding RNA 1736 [Source:HGNC Symbol;Acc:HGNC:52524]	NA	165.152	5.6072	0.502587	11.1567	6.64346e-29	1.26212e-26	up-regulated
ENSG00000228204		novel transcript, antisense to COBL	NA	255.148	4.47926	0.344443	13.0044	1.15551e-38	4.15827e-36	up-regulated
ENSG00000228205		ribosomal protein S3 (RPS3) pseudogene	NA	22.0032	-2.16288	0.540407	-4.00232	6.27237e-05	0.000624002	down-regulated
ENSG00000228322	GLIS3-AS2	GLIS3 antisense RNA 2 [Source:HGNC Symbol;Acc:HGNC:55796]	NA	27.5949	3.20897	0.503709	6.37068	1.8819e-10	6.33382e-09	up-regulated
ENSG00000228408		novel transcript	NA	652.484	6.65224	0.559013	11.9	1.18394e-32	2.85871e-30	up-regulated
ENSG00000228421		novel transcript	NA	221.33	4.43023	0.640578	6.91599	4.64616e-12	1.88803e-10	up-regulated
ENSG00000228459	LINC01546	long intergenic non-protein coding RNA 1546 [Source:HGNC Symbol;Acc:HGNC:27336]	NA	27.0641	2.35729	0.555063	4.24689	2.16756e-05	0.000251714	up-regulated
ENSG00000228484		novel transcript	101927692	43.9622	3.30848	0.654891	5.05196	4.37309e-07	7.95263e-06	up-regulated
ENSG00000228502	EEF1A1P11	eukaryotic translation elongation factor 1 alpha 1 pseudogene 11 [Source:HGNC Symbol;Acc:HGNC:3206]	NA	19.9749	-2.2207	0.536455	-4.13958	3.47939e-05	0.000380982	down-regulated
ENSG00000228510		novel pseudogene	NA	7.82889	-2.09026	0.538072	-3.88472	0.000102449	0.000947199	down-regulated
ENSG00000228528		novel transcript	NA	110.301	4.0793	0.573041	7.11869	1.08955e-12	4.72509e-11	up-regulated
ENSG00000228590		MIR4432 host gene [Source:NCBI gene (formerly Entrezgene);Acc:106660609]	106660609	12.8074	-3.55756	0.822589	-4.32484	1.52646e-05	0.000185184	down-regulated
ENSG00000228592		D21S2088E [Source:NCBI gene (formerly Entrezgene);Acc:266917]	266917	4.81108	3.83897	0.833877	4.60376	4.14925e-06	5.94753e-05	up-regulated
ENSG00000228672	PROB1	proline rich basic protein 1 [Source:HGNC Symbol;Acc:HGNC:41906]	389333	504.401	2.17082	0.350031	6.2018	5.58217e-10	1.7675e-08	up-regulated
ENSG00000228683		novel transcript	NA	3.9289	4.96444	0.851551	5.82987	5.54699e-09	1.50355e-07	up-regulated
ENSG00000228692		novel transcript	NA	12.2024	3.22924	0.81715	3.95184	7.75532e-05	0.000746529	up-regulated
ENSG00000228741		spermatogenesis associated 13 [Source:NCBI gene (formerly Entrezgene);Acc:221178]	221178	26.0655	2.85432	0.495391	5.76175	8.32449e-09	2.18941e-07	up-regulated
ENSG00000228835		novel transcript, antisense to KLHL14	NA	19.0188	-3.79045	0.81201	-4.66798	3.0418e-06	4.54097e-05	down-regulated
ENSG00000228960	OR2A9P	olfactory receptor family 2 subfamily A member 9 pseudogene [Source:HGNC Symbol;Acc:HGNC:8236]	NA	23.8291	-2.08078	0.485032	-4.28999	1.78679e-05	0.000212631	down-regulated
ENSG00000228971	LINC02607	long intergenic non-protein coding RNA 2607 [Source:HGNC Symbol;Acc:HGNC:54049]	100996635	21.2204	-4.09714	0.977267	-4.19245	2.75963e-05	0.000311747	down-regulated
ENSG00000229056	HECW2-AS1	HECW2 antisense RNA 1 [Source:HGNC Symbol;Acc:HGNC:54062]	101927482	20.8566	-2.61868	0.628386	-4.16731	3.08211e-05	0.000343102	down-regulated
ENSG00000229119	RPLP0P9	ribosomal protein lateral stalk subunit P0 pseudogene 9 [Source:HGNC Symbol;Acc:HGNC:55906]	NA	79.0082	-2.30946	0.465276	-4.96363	6.9188e-07	1.20155e-05	down-regulated
ENSG00000229291	LINC02768	long intergenic non-protein coding RNA 2768 [Source:HGNC Symbol;Acc:HGNC:54288]	NA	10.6614	2.2294	0.478155	4.6625	3.12398e-06	4.64883e-05	up-regulated
ENSG00000229385	CTNNA2-AS1	CTNNA2 antisense RNA 1 [Source:HGNC Symbol;Acc:HGNC:40165]	NA	18.392	6.24993	0.758319	8.24182	1.69608e-16	1.16259e-14	up-regulated
ENSG00000229403		novel transcript	NA	9.00812	5.49354	0.993036	5.53207	3.16479e-08	7.43537e-07	up-regulated
ENSG00000229491		novel transcript	NA	3.1989	4.60268	0.86528	5.31929	1.04172e-07	2.18784e-06	up-regulated
ENSG00000229520	LINC00404	long intergenic non-protein coding RNA 404 [Source:HGNC Symbol;Acc:HGNC:42734]	NA	80.9155	4.95845	0.672816	7.3697	1.71018e-13	8.29083e-12	up-regulated
ENSG00000229589	ACVR2B-AS1	ACVR2B antisense RNA 1 [Source:HGNC Symbol;Acc:HGNC:44161]	100128640	141.514	-2.52202	0.622599	-4.05079	5.10445e-05	0.000524833	down-regulated
ENSG00000229654	LINC02526	long intergenic non-protein coding RNA 2526 [Source:HGNC Symbol;Acc:HGNC:53550]	NA	9.81014	3.6632	0.687777	5.32615	1.00318e-07	2.1164e-06	up-regulated
ENSG00000229951	FOSL2-AS1	FOSL2 antisense RNA 1 [Source:HGNC Symbol;Acc:HGNC:55784]	403150	29.7183	-2.66627	0.505199	-5.27767	1.30838e-07	2.67874e-06	down-regulated
ENSG00000229953		novel transcript	NA	494.312	6.62987	0.470412	14.0938	4.14879e-45	2.46464e-42	up-regulated
ENSG00000230018	PPIAP39	peptidylprolyl isomerase A pseudogene 39 [Source:HGNC Symbol;Acc:HGNC:53663]	NA	20.6012	4.23959	0.547384	7.74519	9.54357e-15	5.35498e-13	up-regulated
ENSG00000230062	ANKRD66	ankyrin repeat domain 66 [Source:HGNC Symbol;Acc:HGNC:44669]	100287718	43.9219	4.46439	0.594197	7.51332	5.76459e-14	2.95542e-12	up-regulated
ENSG00000230260		novel transcript	NA	38.8216	6.02741	0.538382	11.1954	4.29333e-29	8.28259e-27	up-regulated
ENSG00000230269	LINC02525	long intergenic non-protein coding RNA 2525 [Source:HGNC Symbol;Acc:HGNC:53545]	NA	6.88438	3.07638	0.626112	4.91347	8.94799e-07	1.51397e-05	up-regulated
ENSG00000230316	FEZF1-AS1	FEZF1 antisense RNA 1 [Source:HGNC Symbol;Acc:HGNC:41001]	154860	107.101	5.26242	0.627132	8.39125	4.80985e-17	3.43537e-15	up-regulated
ENSG00000230445	LRRC37A6P	leucine rich repeat containing 37 member A6, pseudogene [Source:HGNC Symbol;Acc:HGNC:33746]	NA	152.958	4.26309	0.364426	11.6981	1.30313e-31	2.93802e-29	up-regulated
ENSG00000230461	PROX1-AS1	PROX1 antisense RNA 1 [Source:HGNC Symbol;Acc:HGNC:43656]	NA	57.9451	2.46539	0.631808	3.90212	9.53534e-05	0.000890838	up-regulated
ENSG00000230489	VAV3-AS1	VAV3 antisense RNA 1 [Source:HGNC Symbol;Acc:HGNC:40608]	100873946	21.4538	-3.41651	0.783789	-4.35897	1.30674e-05	0.000161566	down-regulated
ENSG00000230506		novel transcript	NA	7.82073	2.53524	0.570017	4.44765	8.6815e-06	0.000113605	up-regulated
ENSG00000230596	GPAA1P2	glycosylphosphatidylinositol anchor attachment 1 pseudogene 2 [Source:HGNC Symbol;Acc:HGNC:51484]	NA	33.3009	-2.84149	0.697274	-4.07514	4.59873e-05	0.000481029	down-regulated
ENSG00000230606	LINC02969	long intergenic non-protein coding RNA 2969 [Source:HGNC Symbol;Acc:HGNC:56009]	NA	62.8858	-2.2208	0.48316	-4.59641	4.29838e-06	6.1331e-05	down-regulated
ENSG00000230623		novel transcript, antisense to ZNF281	NA	24.8785	3.05137	0.744124	4.10062	4.12038e-05	0.000439432	up-regulated
ENSG00000230630	DNM3OS	DNM3 opposite strand/antisense RNA [Source:HGNC Symbol;Acc:HGNC:41228]	NA	82.6595	-2.60686	0.594922	-4.38184	1.17679e-05	0.000147645	down-regulated
ENSG00000230646	KLF2P2	Kruppel like factor 2 pseudogene 2 [Source:HGNC Symbol;Acc:HGNC:49281]	NA	49.4269	2.99486	0.420936	7.11478	1.12093e-12	4.84992e-11	up-regulated
ENSG00000230707		novel protein (LOC389895)	389895	37.1891	3.18045	0.568472	5.59473	2.20966e-08	5.36309e-07	up-regulated
ENSG00000230729		novel transcript	NA	671.44	5.89727	0.465173	12.6776	7.87038e-37	2.4144e-34	up-regulated
ENSG00000230747		novel transcript	NA	34.6671	2.31531	0.507692	4.56047	5.10394e-06	7.14093e-05	up-regulated
ENSG00000230805		novel transcript	NA	43.9907	-2.45561	0.536887	-4.57378	4.78995e-06	6.74195e-05	down-regulated
ENSG00000230873	STMND1	stathmin domain containing 1 [Source:HGNC Symbol;Acc:HGNC:44668]	401236	27.3675	2.71096	0.598669	4.5283	5.94593e-06	8.16333e-05	up-regulated
ENSG00000230910	ADGRB3-DT	ADGRB3 divergent transcript [Source:HGNC Symbol;Acc:HGNC:55774]	NA	236.154	2.79747	0.592553	4.72105	2.34631e-06	3.59154e-05	up-regulated
ENSG00000230970	HHATL-AS1	HHATL antisense RNA 1 [Source:HGNC Symbol;Acc:HGNC:42439]	100874044	14.6386	3.63064	0.658218	5.51587	3.47066e-08	8.06788e-07	up-regulated
ENSG00000230979		ribosomal protein L18a (RPL18A) pseudogene	NA	15.8868	-2.03366	0.49249	-4.12933	3.63814e-05	0.00039559	down-regulated
ENSG00000231057	NEK2-DT	NEK2 divergent transcript [Source:HGNC Symbol;Acc:HGNC:28085]	NA	15.1539	3.489	0.874424	3.99005	6.60587e-05	0.000652325	up-regulated
ENSG00000231080		novel transcript	NA	71.6487	3.01731	0.352595	8.55744	1.15405e-17	8.86885e-16	up-regulated
ENSG00000231123	SPATA20P1	spermatogenesis associated 20 pseudogene 1 [Source:HGNC Symbol;Acc:HGNC:39636]	NA	27.9409	-2.90257	0.517962	-5.60383	2.09667e-08	5.11537e-07	down-regulated
ENSG00000231165	TRBV26OR9-2	T cell receptor beta variable 26/OR9-2 (pseudogene) [Source:HGNC Symbol;Acc:HGNC:15485]	NA	8.17076	4.29606	0.675317	6.36154	1.9974e-10	6.70447e-09	up-regulated
ENSG00000231252		novel transcript	101926964	49.4347	3.78108	0.748353	5.05254	4.35982e-07	7.94018e-06	up-regulated
ENSG00000231381	RNF2P1	ring finger protein 2 pseudogene 1 [Source:HGNC Symbol;Acc:HGNC:33987]	NA	12.8137	3.23597	0.814348	3.97369	7.07664e-05	0.000691516	up-regulated
ENSG00000231566	LINC02595	long intergenic non-protein coding RNA 2595 [Source:HGNC Symbol;Acc:HGNC:53946]	NA	97.025	-4.34633	0.960366	-4.5257	6.01949e-06	8.24618e-05	down-regulated
ENSG00000231585		novel transcript	NA	7.76292	4.14996	1.07236	3.86993	0.000108868	0.000997673	up-regulated
ENSG00000231713		novel transcript	NA	11.6851	2.5366	0.515491	4.92075	8.62121e-07	1.46863e-05	up-regulated
ENSG00000231720		novel transcript	NA	9.76301	5.51804	1.34027	4.11712	3.83642e-05	0.000414378	up-regulated
ENSG00000231768	LINC01354	long intergenic non-protein coding RNA 1354 [Source:HGNC Symbol;Acc:HGNC:50581]	100506795	155.814	3.89612	0.472521	8.2454	1.64608e-16	1.13039e-14	up-regulated
ENSG00000232006		novel transcript	NA	42.0195	-3.16265	0.651468	-4.85466	1.20596e-06	1.98655e-05	down-regulated
ENSG00000232065	LINC01063	long intergenic non-protein coding RNA 1063 [Source:HGNC Symbol;Acc:HGNC:49092]	NA	18.8602	2.05202	0.417384	4.91639	8.81532e-07	1.49625e-05	up-regulated
ENSG00000232259		novel transcript	NA	17.6402	3.01788	0.540679	5.58165	2.38252e-08	5.75278e-07	up-regulated
ENSG00000232295		novel transcript, antisense OGFRL1	NA	2740.95	3.19256	0.470395	6.78699	1.14495e-11	4.51063e-10	up-regulated
ENSG00000232316	LINC02518	long intergenic non-protein coding RNA 2518 [Source:HGNC Symbol;Acc:HGNC:53509]	NA	7.43818	3.36069	0.867733	3.87295	0.000107526	0.000987792	up-regulated
ENSG00000232358		novel transcript	NA	371.609	3.0328	0.690994	4.38904	1.13853e-05	0.000143518	up-regulated
ENSG00000232520	GCSIR	GPR55 cis regulatory suppressor of immune response RNA [Source:HGNC Symbol;Acc:HGNC:54400]	151484	15.9791	4.27775	0.624876	6.84575	7.6075e-12	3.03861e-10	up-regulated
ENSG00000232528		pseudogene similar to F830045P16Rik	100289473	17.1499	2.1909	0.404608	5.41488	6.13304e-08	1.35259e-06	up-regulated
ENSG00000232573	RPL3P4	ribosomal protein L3 pseudogene 4 [Source:HGNC Symbol;Acc:HGNC:19805]	NA	446.312	-2.06431	0.340295	-6.06625	1.30933e-09	3.95505e-08	down-regulated
ENSG00000232587	EEF1A1P3	eukaryotic translation elongation factor 1 alpha 1 pseudogene 3 [Source:HGNC Symbol;Acc:HGNC:3194]	NA	22.7139	-2.79385	0.685114	-4.07793	4.54377e-05	0.000476212	down-regulated
ENSG00000232701	RPL21P108	ribosomal protein L21 pseudogene 108 [Source:HGNC Symbol;Acc:HGNC:35496]	NA	4.34945	3.32044	0.776759	4.27474	1.91363e-05	0.000226	up-regulated
ENSG00000232887		novel pseudogene	NA	4.68764	5.57095	1.01842	5.47019	4.49549e-08	1.01783e-06	up-regulated
ENSG00000233009	NALCN-AS1	NALCN antisense RNA 1 [Source:HGNC Symbol;Acc:HGNC:42743]	100885778	138.452	2.5479	0.390265	6.52865	6.63672e-11	2.34769e-09	up-regulated
ENSG00000233067	PTCHD1-AS	PTCHD1 antisense RNA (head to head) [Source:HGNC Symbol;Acc:HGNC:37703]	NA	30.7085	5.18446	0.463149	11.1939	4.36618e-29	8.37993e-27	up-regulated
ENSG00000233078		novel transcript	NA	39.4202	3.02052	0.564925	5.34677	8.95395e-08	1.90296e-06	up-regulated
ENSG00000233221	ARHGEF4-AS1	ARHGEF4 antisense RNA 1 [Source:HGNC Symbol;Acc:HGNC:55716]	NA	45.7496	4.31311	0.651966	6.61555	3.70181e-11	1.35694e-09	up-regulated
ENSG00000233237	LINC00472	long intergenic non-protein coding RNA 472 [Source:HGNC Symbol;Acc:HGNC:21380]	79940	317.415	2.57072	0.417248	6.16113	7.22288e-10	2.26212e-08	up-regulated
ENSG00000233251		novel transcript, antisense to CCDC85A	100129434	151.974	2.00919	0.481338	4.17417	2.9907e-05	0.000334519	up-regulated
ENSG00000233492		novel transcript	NA	2.68083	4.39825	0.924713	4.75634	1.97131e-06	3.07154e-05	up-regulated
ENSG00000233521	LINC01638	long intergenic non-protein coding RNA 1638 [Source:HGNC Symbol;Acc:HGNC:52425]	105372978	35.8063	-5.52723	1.06811	-5.17476	2.2821e-07	4.41622e-06	down-regulated
ENSG00000233611	GBX2-AS1	GBX2 and ASB18 antisense RNA 1 [Source:HGNC Symbol;Acc:HGNC:55714]	NA	32.4488	2.38647	0.59608	4.00361	6.23838e-05	0.000620951	up-regulated
ENSG00000233642	GPR158-AS1	GPR158 antisense RNA 1 [Source:HGNC Symbol;Acc:HGNC:44163]	100128811	48.9332	5.7504	0.567183	10.1385	3.72667e-24	4.92842e-22	up-regulated
ENSG00000233670	PIRT	phosphoinositide interacting regulator of transient receptor potential channels [Source:HGNC Symbol;Acc:HGNC:37239]	644139	1073.72	6.02589	0.788595	7.6413	2.15046e-14	1.15637e-12	up-regulated
ENSG00000233735		novel transcript	NA	75.4492	6.6197	0.523234	12.6515	1.09746e-36	3.28589e-34	up-regulated
ENSG00000233762	RPS15P4	ribosomal protein S15 pseudogene 4 [Source:HGNC Symbol;Acc:HGNC:35712]	NA	127.015	-2.05324	0.470039	-4.36825	1.25248e-05	0.000155629	down-regulated
ENSG00000233955	AHCYP3	adenosylhomocysteinase pseudogene 3 [Source:HGNC Symbol;Acc:HGNC:44995]	NA	2.38554	4.56609	0.930898	4.90504	9.34085e-07	1.57261e-05	up-regulated
ENSG00000234020	CHIAP3	chitinase, acidic pseudogene 3 [Source:HGNC Symbol;Acc:HGNC:44464]	NA	9.93695	4.54256	0.889955	5.10426	3.32094e-07	6.21447e-06	up-regulated
ENSG00000234070	SPATA17-AS1	SPATA17 antisense RNA 1 [Source:HGNC Symbol;Acc:HGNC:41086]	103752555	34.1122	3.17762	0.468666	6.78013	1.20065e-11	4.70531e-10	up-regulated
ENSG00000234166	ARHGEF19-AS1	ARHGEF19 antisense RNA 1 [Source:HGNC Symbol;Acc:HGNC:39996]	NA	290.504	-2.67013	0.535243	-4.98863	6.081e-07	1.07186e-05	down-regulated
ENSG00000234175		pseudogene similar to part of chromodomain protein, Y chromosome, 1 (CDY1)	NA	27.6301	2.71926	0.258343	10.5258	6.57132e-26	9.95701e-24	up-regulated
ENSG00000234177	LINC01114	long intergenic non-protein coding RNA 1114 [Source:HGNC Symbol;Acc:HGNC:49245]	284998	136.68	5.76839	0.629414	9.1647	4.96857e-20	4.61424e-18	up-regulated
ENSG00000234287		ribosomal protein S27 (RPS27) pseudogene	NA	36.9114	-2.43582	0.569344	-4.27829	1.88336e-05	0.000222636	down-regulated
ENSG00000234497	ERICH3-AS1	ERICH3 antisense RNA 1 [Source:HGNC Symbol;Acc:HGNC:41093]	101927320	43.9346	5.9843	0.700241	8.54605	1.27369e-17	9.70854e-16	up-regulated
ENSG00000234515	PPP1R2P1	protein phosphatase 1 regulatory inhibitor subunit 2 pseudogene 1 [Source:HGNC Symbol;Acc:HGNC:9289]	NA	7.93584	3.86475	0.629645	6.13798	8.35784e-10	2.59155e-08	up-regulated
ENSG00000234527	PCDH9-AS1	PCDH9 antisense RNA 1 [Source:HGNC Symbol;Acc:HGNC:39897]	NA	47.0179	6.83238	0.554377	12.3244	6.69111e-35	1.89713e-32	up-regulated
ENSG00000234577	SYNE1-AS1	SYNE1 antisense RNA 1 [Source:HGNC Symbol;Acc:HGNC:40793]	NA	35.1863	4.19964	0.56435	7.44156	9.95036e-14	4.94558e-12	up-regulated
ENSG00000234692		novel transcript	NA	9.1496	5.22499	0.827736	6.31239	2.74755e-10	9.07588e-09	up-regulated
ENSG00000234737	KRT18P15	keratin 18 pseudogene 15 [Source:HGNC Symbol;Acc:HGNC:32449]	NA	9.56565	-6.0911	1.35585	-4.49245	7.04099e-06	9.4995e-05	down-regulated
ENSG00000234741	GAS5	growth arrest specific 5 [Source:HGNC Symbol;Acc:HGNC:16355]	60674	6110.07	-2.29693	0.513842	-4.4701	7.81822e-06	0.000103945	down-regulated
ENSG00000234754	LINC02817	long intergenic non-protein coding RNA 2817 [Source:HGNC Symbol;Acc:HGNC:32042]	400804	10.3971	4.13623	0.730821	5.65971	1.51633e-08	3.78334e-07	up-regulated
ENSG00000234758		novel transcript	NA	48.9859	4.28502	0.494817	8.6598	4.72586e-18	3.7552e-16	up-regulated
ENSG00000234775		novel transcript	NA	51.3364	3.84979	0.46281	8.3183	8.92303e-17	6.27732e-15	up-regulated
ENSG00000234797	RPS3AP6	RPS3A pseudogene 6 [Source:HGNC Symbol;Acc:HGNC:18630]	NA	276.252	-2.09378	0.513742	-4.07555	4.59059e-05	0.000480384	down-regulated
ENSG00000234810		novel transcript	NA	17.6688	2.76624	0.601979	4.59524	4.32248e-06	6.16044e-05	up-regulated
ENSG00000234869	LINC02925	long intergenic non-protein coding RNA 2925 [Source:HGNC Symbol;Acc:HGNC:55756]	NA	32.9428	-2.19635	0.492732	-4.45749	8.29246e-06	0.000109203	down-regulated
ENSG00000234899	SOX9-AS1	SOX9 antisense RNA 1 [Source:HGNC Symbol;Acc:HGNC:49321]	400618	151.471	2.65281	0.624361	4.24884	2.14885e-05	0.000249915	up-regulated
ENSG00000234913		novel transcript	NA	21.7597	-3.99443	0.951969	-4.19597	2.71709e-05	0.000307313	down-regulated
ENSG00000234921		novel transcript, antisense to LHX2	NA	44.6269	3.77909	0.563545	6.70592	2.00139e-11	7.55079e-10	up-regulated
ENSG00000235033	DAAM2-AS1	DAAM2 antisense RNA 1 [Source:HGNC Symbol;Acc:HGNC:40830]	100505635	586.43	2.66133	0.506531	5.25403	1.48803e-07	3.00545e-06	up-regulated
ENSG00000235058	ZMYND10-AS1	ZMYND10 antisense RNA 1 [Source:HGNC Symbol;Acc:HGNC:40890]	NA	232.905	5.21641	0.261155	19.9744	9.20192e-89	3.82657e-85	up-regulated
ENSG00000235092	ID2-AS1	ID2 antisense RNA 1 [Source:HGNC Symbol;Acc:HGNC:51103]	NA	483.555	3.26668	0.27694	11.7956	4.11151e-32	9.4986e-30	up-regulated
ENSG00000235174	RPL39P3	ribosomal protein L39 pseudogene 3 [Source:HGNC Symbol;Acc:HGNC:21383]	NA	123.867	-2.29347	0.551017	-4.16224	3.15137e-05	0.000349876	down-regulated
ENSG00000235180	LINC00601	long intergenic non-protein coding RNA 601 [Source:HGNC Symbol;Acc:HGNC:43916]	101101772	10.8696	4.0761	0.685545	5.94577	2.75158e-09	7.89728e-08	up-regulated
ENSG00000235267		ribosomal protein S15a (RPS15A) pseudogene	NA	3.08583	-4.39664	1.08803	-4.04093	5.32395e-05	0.000543135	down-regulated
ENSG00000235272	RAMACL	RNA guanine-7 methyltransferase activating subunit like (pseudogene) [Source:HGNC Symbol;Acc:HGNC:21234]	353267	27.6617	-2.74919	0.659548	-4.16829	3.06889e-05	0.000341732	down-regulated
ENSG00000235335	B3GALT1-AS1	B3GALT1 antisense RNA 1 [Source:HGNC Symbol;Acc:HGNC:40089]	NA	5.11615	2.68073	0.605206	4.42945	9.44716e-06	0.0001223	up-regulated
ENSG00000235438	ESRRAP2	estrogen-related receptor alpha pseudogene 2 [Source:HGNC Symbol;Acc:HGNC:24647]	105370105	19.6858	2.2674	0.410743	5.52024	3.38542e-08	7.89426e-07	up-regulated
ENSG00000235447	TRAPPC13P1	trafficking protein particle complex 13 pseudogene 1 [Source:HGNC Symbol;Acc:HGNC:50347]	NA	12.3464	2.76823	0.67406	4.1068	4.01178e-05	0.000429993	up-regulated
ENSG00000235505	CASP4LP	caspase 4 like, pseudogene [Source:HGNC Symbol;Acc:HGNC:53657]	643733	115.176	-2.23531	0.492278	-4.54076	5.60526e-06	7.73249e-05	down-regulated
ENSG00000235552	RPL6P27	ribosomal protein L6 pseudogene 27 [Source:HGNC Symbol;Acc:HGNC:36133]	NA	286.696	-2.19985	0.402206	-5.46947	4.51389e-08	1.02015e-06	down-regulated
ENSG00000235665	LINC00298	long intergenic non-protein coding RNA 298 [Source:HGNC Symbol;Acc:HGNC:49257]	339788	29.9675	3.80343	0.812959	4.67851	2.88973e-06	4.33472e-05	up-regulated
ENSG00000236028		novel transcript	NA	26.326	-6.15274	1.43646	-4.28327	1.84164e-05	0.000218118	down-regulated
ENSG00000236039	LINC02889	long intergenic non-protein coding RNA 2889 [Source:HGNC Symbol;Acc:HGNC:55071]	101927630	17.485	-2.58801	0.643821	-4.01976	5.82582e-05	0.00058691	down-regulated
ENSG00000236064		novel transcript, antisense to MID2	101928335	41.9383	-3.41481	0.781289	-4.37075	1.23823e-05	0.000154267	down-regulated
ENSG00000236083	OR13E1P	olfactory receptor family 13 subfamily E member 1 pseudogene [Source:HGNC Symbol;Acc:HGNC:15107]	NA	30.5891	2.00319	0.498949	4.01482	5.94918e-05	0.000596768	up-regulated
ENSG00000236106		novel transcript	112268411	15.3991	4.41635	0.810607	5.44821	5.08805e-08	1.13687e-06	up-regulated
ENSG00000236107	SCN1A-AS1	SCN1A and SCN9A antisense RNA 1 [Source:HGNC Symbol;Acc:HGNC:54069]	101929680	166.499	3.04852	0.638091	4.77756	1.77431e-06	2.7978e-05	up-regulated
ENSG00000236107	SCN1A-AS1	SCN1A and SCN9A antisense RNA 1 [Source:HGNC Symbol;Acc:HGNC:54069]	102724058	166.499	3.04852	0.638091	4.77756	1.77431e-06	2.7978e-05	up-regulated
ENSG00000236116		novel transcript	NA	3.79841	3.1902	0.811632	3.93059	8.4736e-05	0.00080511	up-regulated
ENSG00000236164		novel transcript	NA	19.4096	4.96548	0.80468	6.17075	6.79658e-10	2.13576e-08	up-regulated
ENSG00000236276	NDP-AS1	NDP antisense RNA 1 [Source:HGNC Symbol;Acc:HGNC:40395]	NA	114.403	4.17877	0.542663	7.70048	1.35555e-14	7.42793e-13	up-regulated
ENSG00000236352		novel transcript	NA	25.6834	3.492	0.393543	8.87323	7.10574e-19	6.04408e-17	up-regulated
ENSG00000236360	RRAS2P1	RRAS2 pseudogene 1 [Source:HGNC Symbol;Acc:HGNC:54561]	NA	16.1406	2.46451	0.422418	5.83429	5.40198e-09	1.46929e-07	up-regulated
ENSG00000236502	SIX3-AS1	SIX3 antisense RNA 1 [Source:HGNC Symbol;Acc:HGNC:40532]	100506108	206.459	5.85445	0.60523	9.67311	3.92272e-22	4.39556e-20	up-regulated
ENSG00000236508	ATP13A5-AS1	ATP13A5 antisense RNA 1 [Source:HGNC Symbol;Acc:HGNC:41281]	NA	5.32945	3.24569	0.629395	5.15685	2.51143e-07	4.81767e-06	up-regulated
ENSG00000236552	RPL13AP5	ribosomal protein L13a pseudogene 5 [Source:HGNC Symbol;Acc:HGNC:23736]	728658	610.28	-2.03352	0.450325	-4.51567	6.31162e-06	8.59602e-05	down-regulated
ENSG00000236754		novel transcript	101929372	292.33	5.71432	0.406026	14.0738	5.50664e-45	3.22018e-42	up-regulated
ENSG00000236780	LINC01829	long intergenic non-protein coding RNA 1829 [Source:HGNC Symbol;Acc:HGNC:52635]	644838	23.4889	-2.2009	0.536295	-4.1039	4.06242e-05	0.0004344	down-regulated
ENSG00000236819	LINC01563	long intergenic non-protein coding RNA 1563 [Source:HGNC Symbol;Acc:HGNC:51343]	101060544	72.1729	5.31721	0.576894	9.21695	3.05665e-20	2.94083e-18	up-regulated
ENSG00000236963	LINC01141	long intergenic non-protein coding RNA 1141 [Source:HGNC Symbol;Acc:HGNC:49455]	NA	41.4634	3.42335	0.601368	5.69261	1.25115e-08	3.18107e-07	up-regulated
ENSG00000237009	GLIS3-AS1	GLIS3 antisense RNA 1 [Source:HGNC Symbol;Acc:HGNC:28260]	84850	71.168	3.15361	0.369153	8.54281	1.30994e-17	9.94442e-16	up-regulated
ENSG00000237031		novel transcript	NA	331.874	6.63362	0.557915	11.89	1.33384e-32	3.20002e-30	up-regulated
ENSG00000237076		novel transcript	NA	7.32033	-5.68019	1.46731	-3.87115	0.000108321	0.000993145	down-regulated
ENSG00000237187	NR2F1-AS1	NR2F1 antisense RNA 1 [Source:HGNC Symbol;Acc:HGNC:48622]	441094	1011.74	2.08741	0.504063	4.14117	3.45541e-05	0.000378744	up-regulated
ENSG00000237232	ZNF295-AS1	ZNF295 antisense RNA 1 [Source:HGNC Symbol;Acc:HGNC:23130]	150142	103.014	2.20261	0.442055	4.98267	6.27119e-07	1.10087e-05	up-regulated
ENSG00000237341	SYP-AS1	SYP antisense RNA 1 [Source:HGNC Symbol;Acc:HGNC:40571]	NA	94.8608	2.86714	0.469467	6.10723	1.01377e-09	3.1125e-08	up-regulated
ENSG00000237410	NRXN2-AS1	NRXN2 antisense RNA 1 [Source:HGNC Symbol;Acc:HGNC:40416]	NA	7.57623	2.67985	0.659324	4.06454	4.81267e-05	0.000499498	up-regulated
ENSG00000237457	BRINP3-DT	BRINP3 divergent transcript [Source:HGNC Symbol;Acc:HGNC:50577]	NA	20.663	6.21128	0.678442	9.15522	5.4249e-20	5.02555e-18	up-regulated
ENSG00000237515	SHISA9	shisa family member 9 [Source:HGNC Symbol;Acc:HGNC:37231]	729993	612.772	5.3637	0.533751	10.0491	9.27301e-24	1.18853e-21	up-regulated
ENSG00000237529		novel transcript	NA	40.8665	2.27108	0.354024	6.41506	1.40767e-10	4.79812e-09	up-regulated
ENSG00000237575	PYY2	peptide YY 2 (pseudogene) [Source:HGNC Symbol;Acc:HGNC:9749]	23615	15.5117	-2.6406	0.590571	-4.47127	7.77578e-06	0.000103454	down-regulated
ENSG00000237581		novel transcript	NA	6.78777	5.77554	1.31475	4.39288	1.11858e-05	0.000141337	up-regulated
ENSG00000237655		novel transcript, antisense to TTC30A	NA	72.6997	2.60038	0.355532	7.31405	2.59202e-13	1.23108e-11	up-regulated
ENSG00000237911	SRP68P3	signal recognition particle 68 pseudogene 3 [Source:HGNC Symbol;Acc:HGNC:30428]	NA	7.50035	3.12419	0.725975	4.30344	1.68164e-05	0.000201721	up-regulated
ENSG00000237924	RPL21P112	ribosomal protein L21 pseudogene 112 [Source:HGNC Symbol;Acc:HGNC:36526]	NA	3.73359	5.23936	1.03062	5.08369	3.70173e-07	6.84153e-06	up-regulated
ENSG00000237928	NFIA-AS2	NFIA antisense RNA 2 [Source:HGNC Symbol;Acc:HGNC:40401]	100996570	252.318	4.63811	0.361157	12.8424	9.494e-38	3.2302e-35	up-regulated
ENSG00000237949	LINC00844	long intergenic non-protein coding RNA 844 [Source:HGNC Symbol;Acc:HGNC:45031]	NA	398.259	7.15738	0.615617	11.6264	3.02759e-31	6.51211e-29	up-regulated
ENSG00000238021	ODAD2P1	outer dynein arm docking complex subunit 2 pseudogene 1 [Source:HGNC Symbol;Acc:HGNC:44937]	NA	5.93868	3.85501	0.796619	4.83922	1.30349e-06	2.13405e-05	up-regulated
ENSG00000238062	SPATA3-AS1	SPATA3 antisense RNA 1 (head to head) [Source:HGNC Symbol;Acc:HGNC:28013]	348761	9.30861	3.0068	0.741109	4.05716	4.96738e-05	0.000513136	up-regulated
ENSG00000238099	LINC01625	long intergenic non-protein coding RNA 1625 [Source:HGNC Symbol;Acc:HGNC:52052]	645434	31.8379	2.48457	0.624425	3.97897	6.9214e-05	0.000678649	up-regulated
ENSG00000238123	MID1IP1-AS1	MID1IP1 antisense RNA 1 [Source:HGNC Symbol;Acc:HGNC:40932]	NA	131.552	2.06171	0.303461	6.79399	1.09077e-11	4.30625e-10	up-regulated
ENSG00000238185		novel transcript	NA	28.2866	6.40582	0.636687	10.0612	8.20041e-24	1.05467e-21	up-regulated
ENSG00000238194	PHACTR3-AS1	PHACTR3 antisense RNA 1 [Source:HGNC Symbol;Acc:HGNC:40727]	NA	11.2459	5.85056	0.794948	7.35967	1.8436e-13	8.91456e-12	up-regulated
ENSG00000238272		novel transcript	NA	4.09128	3.9935	0.83719	4.77012	1.84116e-06	2.88435e-05	up-regulated
ENSG00000238273		novel transcript, antisense to FHL2	NA	37.6564	-3.16964	0.592415	-5.35037	8.77766e-08	1.86974e-06	down-regulated
ENSG00000238297		Small nucleolar RNA U3 [Source:RFAM;Acc:RF00012]	NA	5.38127	-5.20798	1.24283	-4.19041	2.7845e-05	0.000313799	down-regulated
ENSG00000238456	RNU6-1014P	RNA, U6 small nuclear 1014, pseudogene [Source:HGNC Symbol;Acc:HGNC:47977]	NA	3.80078	4.91134	1.17255	4.18861	2.80669e-05	0.00031611	up-regulated
ENSG00000239268		novel transcript	NA	90.4381	3.58956	0.662236	5.42036	5.94777e-08	1.31483e-06	up-regulated
ENSG00000239389	PCDHA13	protocadherin alpha 13 [Source:HGNC Symbol;Acc:HGNC:8667]	56136	964.55	2.4676	0.552355	4.46742	7.91687e-06	0.00010507	up-regulated
ENSG00000239440	LINC02008	long intergenic non-protein coding RNA 2008 [Source:HGNC Symbol;Acc:HGNC:52844]	105377180	3.13374	4.26924	0.914171	4.67006	3.01111e-06	4.50055e-05	up-regulated
ENSG00000239473	RPL7P38	ribosomal protein L7 pseudogene 38 [Source:HGNC Symbol;Acc:HGNC:36731]	NA	10.8735	4.90369	0.706595	6.93988	3.92437e-12	1.60869e-10	up-regulated
ENSG00000239559	RPL37P2	ribosomal protein L37 pseudogene 2 [Source:HGNC Symbol;Acc:HGNC:17092]	NA	34.7284	-2.33216	0.525161	-4.44085	8.96038e-06	0.000116806	down-regulated
ENSG00000239775		novel transcript, sense overlapping DBNL	NA	797.905	3.00723	0.288554	10.4217	1.97343e-25	2.90778e-23	up-regulated
ENSG00000239793		ribosomal protein S21 (RPS21) pseudogene	NA	6.29076	3.74745	0.794561	4.71639	2.40072e-06	3.66881e-05	up-regulated
ENSG00000239887	C1orf226	chromosome 1 open reading frame 226 [Source:HGNC Symbol;Acc:HGNC:34351]	400793	774.853	2.85997	0.403886	7.08115	1.42963e-12	6.143e-11	up-regulated
ENSG00000239994		novel transcript	NA	21.6282	2.87492	0.406839	7.06648	1.58919e-12	6.78951e-11	up-regulated
ENSG00000240184	PCDHGC3	protocadherin gamma subfamily C, 3 [Source:HGNC Symbol;Acc:HGNC:8716]	5098	20039.6	2.35307	0.395006	5.95705	2.56827e-09	7.42239e-08	up-regulated
ENSG00000240376		ribosomal protein S8 (RPS8) pseudogene	NA	32.7535	-2.30147	0.585188	-3.93287	8.39376e-05	0.000798741	down-regulated
ENSG00000240497		novel transcript	NA	34.274	3.55821	0.386196	9.21349	3.157e-20	3.00646e-18	up-regulated
ENSG00000240668	KRT8P36	keratin 8 pseudogene 36 [Source:HGNC Symbol;Acc:HGNC:39870]	NA	10.3914	-2.34746	0.552032	-4.25241	2.11486e-05	0.000246423	down-regulated
ENSG00000240694	PNMA2	PNMA family member 2 [Source:HGNC Symbol;Acc:HGNC:9159]	10687	3119.9	3.27614	0.347759	9.42073	4.47981e-21	4.68328e-19	up-regulated
ENSG00000240764	PCDHGC5	protocadherin gamma subfamily C, 5 [Source:HGNC Symbol;Acc:HGNC:8718]	56097	16118.1	2.27373	0.41317	5.50313	3.73097e-08	8.61414e-07	up-regulated
ENSG00000241231		novel transcript	NA	41.3183	3.03116	0.777889	3.89665	9.75314e-05	0.000908238	up-regulated
ENSG00000241505		novel transcript	NA	7.10317	6.51588	0.832799	7.82407	5.11436e-15	2.98146e-13	up-regulated
ENSG00000241544	LINC02029	long intergenic non-protein coding RNA 2029 [Source:HGNC Symbol;Acc:HGNC:52863]	105374177	39.4183	3.64664	0.515875	7.06885	1.56222e-12	6.68203e-11	up-regulated
ENSG00000241588	RN7SL484P	RNA, 7SL, cytoplasmic 484, pseudogene [Source:HGNC Symbol;Acc:HGNC:46500]	NA	6.93137	2.32781	0.480223	4.84735	1.25119e-06	2.05293e-05	up-regulated
ENSG00000241935	HOGA1	4-hydroxy-2-oxoglutarate aldolase 1 [Source:HGNC Symbol;Acc:HGNC:25155]	112817	171.901	2.35823	0.59904	3.93669	8.26143e-05	0.000788756	up-regulated
ENSG00000242060	RPS3AP49	RPS3A pseudogene 49 [Source:HGNC Symbol;Acc:HGNC:36810]	NA	7.68075	-3.71529	0.947059	-3.92298	8.74608e-05	0.000827429	down-regulated
ENSG00000242299		ribosomal protein S18 (RPS18) pseudogene	NA	231.755	-2.39149	0.551473	-4.33655	1.44736e-05	0.000176503	down-regulated
ENSG00000242337	INHCAP	inhibitor of carbonic anhydrase pseudogene [Source:HGNC Symbol;Acc:HGNC:11759]	NA	285.762	4.51724	0.297362	15.1911	4.05271e-52	3.61135e-49	up-regulated
ENSG00000242419	PCDHGC4	protocadherin gamma subfamily C, 4 [Source:HGNC Symbol;Acc:HGNC:8717]	56098	15941.5	2.24906	0.414915	5.42053	5.94221e-08	1.31438e-06	up-regulated
ENSG00000242689	CNTF	ciliary neurotrophic factor [Source:HGNC Symbol;Acc:HGNC:2169]	1270	178.448	4.97953	0.416278	11.962	5.61834e-33	1.38337e-30	up-regulated
ENSG00000242808	SOX2-OT	SOX2 overlapping transcript [Source:HGNC Symbol;Acc:HGNC:20209]	347689	2173.15	5.66454	0.573668	9.87425	5.38333e-23	6.43694e-21	up-regulated
ENSG00000242902	FLNC-AS1	FLNC antisense RNA 1 [Source:HGNC Symbol;Acc:HGNC:53474]	110806300	160.278	3.33755	0.394378	8.46284	2.60954e-17	1.90752e-15	up-regulated
ENSG00000243024		ribosomal protein S11 pseudogene 6	NA	27.6581	2.50206	0.452529	5.52906	3.2196e-08	7.55465e-07	up-regulated
ENSG00000243069	ARHGEF26-AS1	ARHGEF26 antisense RNA 1 [Source:HGNC Symbol;Acc:HGNC:41048]	100507524	403.002	3.99562	0.522396	7.64864	2.0312e-14	1.09539e-12	up-regulated
ENSG00000243199	RPL6P10	ribosomal protein L6 pseudogene 10 [Source:HGNC Symbol;Acc:HGNC:36575]	NA	114.233	-2.30964	0.493624	-4.67894	2.88365e-06	4.32733e-05	down-regulated
ENSG00000243232	PCDHAC2	protocadherin alpha subfamily C, 2 [Source:HGNC Symbol;Acc:HGNC:8677]	56134	1000.42	2.48554	0.552782	4.49642	6.91071e-06	9.33383e-05	up-regulated
ENSG00000243319	FGF14-IT1	FGF14 intronic transcript 1 [Source:HGNC Symbol;Acc:HGNC:42774]	283480	5.75067	2.67373	0.631445	4.2343	2.29263e-05	0.000264175	up-regulated
ENSG00000243321	LINC01998	long intergenic non-protein coding RNA 1998 [Source:HGNC Symbol;Acc:HGNC:52832]	107986046	11.5741	4.76529	0.864938	5.5094	3.60061e-08	8.33888e-07	up-regulated
ENSG00000243429	OR7E29P	olfactory receptor family 7 subfamily E member 29 pseudogene [Source:HGNC Symbol;Acc:HGNC:8401]	NA	11.4584	3.47487	0.637597	5.44994	5.03874e-08	1.1272e-06	up-regulated
ENSG00000243629	LINC00880	long intergenic non-protein coding RNA 880 [Source:HGNC Symbol;Acc:HGNC:27948]	339894	42.2157	3.72077	0.536222	6.93886	3.9528e-12	1.61857e-10	up-regulated
ENSG00000243742	RPLP0P2	ribosomal protein lateral stalk subunit P0 pseudogene 2 [Source:HGNC Symbol;Acc:HGNC:17960]	113157	175.649	-2.50808	0.612517	-4.09472	4.22682e-05	0.000448775	down-regulated
ENSG00000243836	WDR86-AS1	WDR86 antisense RNA 1 [Source:HGNC Symbol;Acc:HGNC:41186]	100131176	185.972	-2.91544	0.723579	-4.0292	5.59668e-05	0.000566489	down-regulated
ENSG00000243978	RTL9	retrotransposon Gag like 9 [Source:HGNC Symbol;Acc:HGNC:29245]	57529	23.7928	2.26248	0.432265	5.23402	1.65862e-07	3.31955e-06	up-regulated
ENSG00000244125		novel transcript, sense overlapping to LRP1B	NA	6.34573	2.69452	0.676576	3.98258	6.81697e-05	0.000670173	up-regulated
ENSG00000244137		novel transcript, antisense to CAPN9	NA	687.391	5.35397	0.652172	8.20945	2.22211e-16	1.50388e-14	up-regulated
ENSG00000244247	LINC01995	long intergenic non-protein coding RNA 1995 [Source:HGNC Symbol;Acc:HGNC:52828]	105374244	1.80209	4.54116	1.01279	4.48381	7.33215e-06	9.82855e-05	up-regulated
ENSG00000244306		double homeobox A pseudogene 10 [Source:NCBI gene (formerly Entrezgene);Acc:503639]	503639	57.1572	-2.29406	0.543726	-4.21915	2.45229e-05	0.000280413	down-regulated
ENSG00000244332		novel transcript, sense overlapping HELLS	NA	24.9952	-2.48213	0.607957	-4.08273	4.45088e-05	0.000467655	down-regulated
ENSG00000244398		ribosomal protein L36a (RPL36A) pseudogene	NA	315.281	-2.13892	0.439063	-4.87156	1.10718e-06	1.83433e-05	down-regulated
ENSG00000244457	ENO1P1	enolase 1 pseudogene 1 [Source:HGNC Symbol;Acc:HGNC:3352]	NA	198.296	-2.26589	0.519809	-4.35908	1.30611e-05	0.000161541	down-regulated
ENSG00000244471	TPTE2P3	transmembrane phosphoinositide 3-phosphatase and tensin homolog 2 pseudogene 3 [Source:HGNC Symbol;Acc:HGNC:27345]	NA	44.9035	2.96729	0.636536	4.66161	3.13739e-06	4.66693e-05	up-regulated
ENSG00000244588	RAD21L1	RAD21 cohesin complex component like 1 [Source:HGNC Symbol;Acc:HGNC:16271]	642636	53.992	3.31909	0.338418	9.80765	1.0437e-22	1.22835e-20	up-regulated
ENSG00000244607	CCDC13	coiled-coil domain containing 13 [Source:HGNC Symbol;Acc:HGNC:26358]	152206	248.918	3.47736	0.416595	8.34711	6.9953e-17	4.94908e-15	up-regulated
ENSG00000244694	PTCHD4	patched domain containing 4 [Source:HGNC Symbol;Acc:HGNC:21345]	442213	508.314	2.80429	0.55536	5.04949	4.42982e-07	8.04418e-06	up-regulated
ENSG00000244968	LIFR-AS1	LIFR antisense RNA 1 [Source:HGNC Symbol;Acc:HGNC:43600]	100506495	256.639	3.22547	0.462482	6.97426	3.07484e-12	1.27866e-10	up-regulated
ENSG00000245526	LINC00461	long intergenic non-protein coding RNA 461 [Source:HGNC Symbol;Acc:HGNC:42810]	645323	612.612	6.34637	0.734034	8.64589	5.3388e-18	4.2154e-16	up-regulated
ENSG00000246022	ALDH1L1-AS2	ALDH1L1 antisense RNA 2 [Source:HGNC Symbol;Acc:HGNC:42446]	100862662	135.738	4.60896	0.766894	6.00991	1.8563e-09	5.47039e-08	up-regulated
ENSG00000246316		artifact	NA	60.8932	4.33363	0.407194	10.6427	1.88624e-26	2.94059e-24	up-regulated
ENSG00000246379	GNAO1-DT	GNAO1 divergent transcript [Source:HGNC Symbol;Acc:HGNC:27543]	283856	65.5967	3.64643	0.667026	5.4667	4.58484e-08	1.03431e-06	up-regulated
ENSG00000247081	BAALC-AS1	BAALC antisense RNA 1 [Source:HGNC Symbol;Acc:HGNC:50461]	105369147	645.071	2.79488	0.29017	9.63184	5.86675e-22	6.49612e-20	up-regulated
ENSG00000247287	PRKCH-AS1	PRKCH antisense RNA 1 [Source:HGNC Symbol;Acc:HGNC:55588]	NA	272.34	-2.75445	0.503163	-5.47428	4.39306e-08	9.98267e-07	down-regulated
ENSG00000247311		novel transcript	NA	27.3934	4.28473	0.473284	9.05318	1.38862e-19	1.2523e-17	up-regulated
ENSG00000247416		novel transcript, antisense to NCAM1	101928847	114.906	4.08029	0.498583	8.18377	2.75095e-16	1.85508e-14	up-regulated
ENSG00000247970		novel transcript	NA	14.1625	2.05647	0.497645	4.13241	3.58982e-05	0.000391129	up-regulated
ENSG00000248008	NRAV	negative regulator of antiviral response [Source:HGNC Symbol;Acc:HGNC:48588]	100506668	614.93	2.03897	0.208653	9.77207	1.48383e-22	1.70873e-20	up-regulated
ENSG00000248100		novel transcript	NA	19.8599	-3.81294	0.839437	-4.54226	5.56552e-06	7.68334e-05	down-regulated
ENSG00000248144	ADH1C	alcohol dehydrogenase 1C (class I), gamma polypeptide [Source:HGNC Symbol;Acc:HGNC:251]	126	56.5521	-4.10792	0.937372	-4.38238	1.1739e-05	0.000147331	down-regulated
ENSG00000248184	LINC02283	long intergenic non-protein coding RNA 2283 [Source:HGNC Symbol;Acc:HGNC:53200]	NA	2.56147	5.04399	1.27515	3.95559	7.6345e-05	0.000736985	up-regulated
ENSG00000248208	WDR45P1	WD repeat domain 45 pseudogene 1 [Source:HGNC Symbol;Acc:HGNC:52406]	NA	44.4033	3.44453	0.60855	5.66022	1.51178e-08	3.77452e-07	up-regulated
ENSG00000248371	LINC02056	long intergenic non-protein coding RNA 2056 [Source:HGNC Symbol;Acc:HGNC:52898]	102477328	7.8153	4.04342	0.676121	5.98033	2.22688e-09	6.49091e-08	up-regulated
ENSG00000248383	PCDHAC1	protocadherin alpha subfamily C, 1 [Source:HGNC Symbol;Acc:HGNC:8676]	56135	982.392	2.47281	0.55079	4.48957	7.13668e-06	9.60782e-05	up-regulated
ENSG00000248399		novel transcript	NA	21.6332	5.70818	0.563599	10.1281	4.14701e-24	5.44582e-22	up-regulated
ENSG00000248528	LINC02058	long intergenic non-protein coding RNA 2058 [Source:HGNC Symbol;Acc:HGNC:52901]	NA	18.9527	3.90684	0.684709	5.70583	1.15776e-08	2.96174e-07	up-regulated
ENSG00000248676		novel transcript	NA	5.58888	3.36449	0.811102	4.14805	3.35319e-05	0.000368477	up-regulated
ENSG00000248896		novel transcript, antisense to SOX7 and PINX1	102723313	59.2582	-2.60453	0.585001	-4.45217	8.50054e-06	0.000111589	down-regulated
ENSG00000248925	PDCD6-DT	PDCD6 divergent transcript [Source:HGNC Symbol;Acc:HGNC:55580]	NA	45.0878	2.04872	0.368804	5.55503	2.77566e-08	6.59149e-07	up-regulated
ENSG00000249035	CLMAT3	colorectal liver metastasis associated transcript 3 [Source:HGNC Symbol;Acc:HGNC:52287]	101927096	2769.3	2.09849	0.424564	4.9427	7.70482e-07	1.3258e-05	up-regulated
ENSG00000249158	PCDHA11	protocadherin alpha 11 [Source:HGNC Symbol;Acc:HGNC:8665]	56138	996.703	2.51962	0.540695	4.65996	3.1627e-06	4.69712e-05	up-regulated
ENSG00000249169		novel transcript	NA	7.90834	3.61768	0.614541	5.88679	3.93772e-09	1.09734e-07	up-regulated
ENSG00000249231	CASC16	cancer susceptibility 16 [Source:HGNC Symbol;Acc:HGNC:48608]	643714	5.00534	2.96184	0.727119	4.07339	4.63337e-05	0.000483976	up-regulated
ENSG00000249306	LINC01411	long intergenic non-protein coding RNA 1411 [Source:HGNC Symbol;Acc:HGNC:50703]	NA	124.236	3.99914	0.578384	6.91434	4.70047e-12	1.9039e-10	up-regulated
ENSG00000249307	LINC01088	long intergenic non-protein coding RNA 1088 [Source:HGNC Symbol;Acc:HGNC:49148]	NA	1362.77	3.84351	0.583851	6.58303	4.6096e-11	1.67008e-09	up-regulated
ENSG00000249335		novel transcript	NA	25.3984	2.42692	0.579127	4.19065	2.78152e-05	0.000313558	up-regulated
ENSG00000249352	LINC02198	long intergenic non-protein coding RNA 2198 [Source:HGNC Symbol;Acc:HGNC:53064]	NA	10.0982	2.2875	0.539817	4.23754	2.25979e-05	0.000261114	up-regulated
ENSG00000249526		novel transcript	NA	11.5015	3.42352	0.548514	6.24145	4.33534e-10	1.39754e-08	up-regulated
ENSG00000249568		novel transcript	NA	14.033	4.46948	0.849511	5.26124	1.43091e-07	2.90261e-06	up-regulated
ENSG00000249577		ARP3 actin-related protein 3 homolog (yeast) pseudogene	NA	15.1771	3.78652	0.488392	7.75304	8.972e-15	5.04942e-13	up-regulated
ENSG00000249610	ZNF474-AS1	ZNF474 antisense RNA 1 [Source:HGNC Symbol;Acc:HGNC:41019]	NA	8.92977	4.0564	0.691192	5.86871	4.39204e-09	1.21222e-07	up-regulated
ENSG00000249621		novel transcript	NA	19.6243	4.63685	1.1469	4.04293	5.27865e-05	0.000539778	up-regulated
ENSG00000249669	CARMN	cardiac mesoderm enhancer-associated non-coding RNA [Source:HGNC Symbol;Acc:HGNC:42872]	NA	207.684	-2.03391	0.503893	-4.03638	5.42822e-05	0.000551796	down-regulated
ENSG00000249721		ribosomal protein L23a (RPL23A) pseudogene	NA	13.5643	-6.10216	1.31984	-4.62342	3.7747e-06	5.48203e-05	down-regulated
ENSG00000249752		novel transcript	NA	7.22753	3.39919	0.742638	4.57718	4.71284e-06	6.64592e-05	up-regulated
ENSG00000249776		novel transcript	NA	24.249	3.08788	0.661693	4.66663	3.06182e-06	4.56905e-05	up-regulated
ENSG00000249825	THBS4-AS1	THBS4 antisense RNA 1 [Source:HGNC Symbol;Acc:HGNC:40583]	101929215	716.975	4.48171	0.350397	12.7904	1.85592e-37	6.14687e-35	up-regulated
ENSG00000249896	JAKMIP1-DT	JAKMIP1 divergent transcript [Source:HGNC Symbol;Acc:HGNC:27728]	NA	38.5282	2.98121	0.655814	4.54582	5.47218e-06	7.56564e-05	up-regulated
ENSG00000249955		novel transcript	NA	38.4589	5.05255	0.465695	10.8495	2.00564e-27	3.42753e-25	up-regulated
ENSG00000249984		novel transcript	NA	8.53199	3.27593	0.636448	5.1472	2.64403e-07	5.04617e-06	up-regulated
ENSG00000250033	SLC7A11-AS1	SLC7A11 antisense RNA 1 [Source:HGNC Symbol;Acc:HGNC:44064]	641364	258.53	3.26915	0.543613	6.01375	1.8128e-09	5.35179e-08	up-regulated
ENSG00000250046		novel transcript	NA	3.04745	3.90222	0.893345	4.3681	1.2533e-05	0.000155644	up-regulated
ENSG00000250060		novel transcript	NA	3.0384	4.58461	1.08201	4.23714	2.26383e-05	0.000261419	up-regulated
ENSG00000250120	PCDHA10	protocadherin alpha 10 [Source:HGNC Symbol;Acc:HGNC:8664]	56139	1055.23	2.4444	0.506945	4.82182	1.42252e-06	2.30873e-05	up-regulated
ENSG00000250240		novel transcript	NA	149.925	2.31985	0.590945	3.92566	8.64935e-05	0.000819105	up-regulated
ENSG00000250241	PCDH10-DT	PCDH10 divergent transcript [Source:HGNC Symbol;Acc:HGNC:53036]	NA	23.2503	3.85145	0.723413	5.324	1.01508e-07	2.13788e-06	up-regulated
ENSG00000250343	STK32A-AS1	STK32A antisense RNA 1 [Source:HGNC Symbol;Acc:HGNC:53468]	NA	31.5223	4.92801	0.650978	7.57016	3.72755e-14	1.95115e-12	up-regulated
ENSG00000250358	LINC02200	long intergenic non-protein coding RNA 2200 [Source:HGNC Symbol;Acc:HGNC:53066]	102467214	8.10056	3.58203	0.772075	4.63948	3.49283e-06	5.12437e-05	up-regulated
ENSG00000250410	LRP2BP-AS1	LRP2BP antisense RNA 1 [Source:HGNC Symbol;Acc:HGNC:55998]	NA	45.5523	2.34377	0.492098	4.76281	1.90914e-06	2.98057e-05	up-regulated
ENSG00000250421		novel transcript	NA	17.6966	-5.29585	1.31189	-4.0368	5.41857e-05	0.000551148	down-regulated
ENSG00000250510	GPR162	G protein-coupled receptor 162 [Source:HGNC Symbol;Acc:HGNC:16693]	27239	850.616	2.09963	0.348778	6.01995	1.74476e-09	5.18249e-08	up-regulated
ENSG00000250551	MIR583HG	MIR583 host gene [Source:HGNC Symbol;Acc:HGNC:53061]	NA	16.0155	-2.43548	0.489915	-4.97122	6.65331e-07	1.16141e-05	down-regulated
ENSG00000250597		novel transcript	NA	10.0991	6.02641	0.822066	7.33081	2.2877e-13	1.09348e-11	up-regulated
ENSG00000250602		novel transcript, antisense to GRAMD3	NA	599.565	2.06758	0.233105	8.86972	7.33333e-19	6.20944e-17	up-regulated
ENSG00000250629		novel transcript	NA	52.1159	5.13045	0.687733	7.45995	8.65584e-14	4.32515e-12	up-regulated
ENSG00000250668	LINC02123	long intergenic non-protein coding RNA 2123 [Source:HGNC Symbol;Acc:HGNC:52980]	101929261	2.63933	4.72141	0.987532	4.78102	1.74406e-06	2.75414e-05	up-regulated
ENSG00000250669		mitochondrial ribosomal protein L39 (MRPL39) pseudogene	NA	13.0607	-5.53474	1.34248	-4.12278	3.7432e-05	0.000405714	down-regulated
ENSG00000250685		novel transcript, antisense to ADAD2	654780	292.212	-2.81419	0.712807	-3.94804	7.87935e-05	0.000756522	down-regulated
ENSG00000250761		novel transcript	NA	141.204	4.64112	0.579717	8.00584	1.18655e-15	7.41365e-14	up-regulated
ENSG00000250803		zinc finger protein 474-like (LOC100505841)	100505841	11.9073	2.97634	0.544739	5.46378	4.66089e-08	1.04901e-06	up-regulated
ENSG00000250934		novel transcript	NA	74.793	4.22175	0.57518	7.33986	2.1381e-13	1.02987e-11	up-regulated
ENSG00000250942	ENPP7P11	ectonucleotide pyrophosphatase/phosphodiesterase 7 pseudogene 11 [Source:HGNC Symbol;Acc:HGNC:48694]	NA	12.1219	2.32831	0.516346	4.50921	6.50682e-06	8.83935e-05	up-regulated
ENSG00000250969		novel transcript	NA	14.5935	4.82983	0.593462	8.1384	4.00528e-16	2.62985e-14	up-regulated
ENSG00000250979		transient receptor potential cation channel, subfamily A, member 1 (TRPA1) pseudogene	NA	5.19364	-3.75799	0.949046	-3.95975	7.50281e-05	0.000726332	down-regulated
ENSG00000251095		novel transcript	NA	545.82	2.01681	0.364366	5.53512	3.1102e-08	7.3209e-07	up-regulated
ENSG00000251189		novel transcript	NA	5.4951	3.46506	0.884544	3.91734	8.95299e-05	0.000843591	up-regulated
ENSG00000251323	LINC02728	long intergenic non-protein coding RNA 2728 [Source:HGNC Symbol;Acc:HGNC:54245]	101928865	20.108	-3.5575	0.687424	-5.17511	2.27774e-07	4.41235e-06	down-regulated
ENSG00000251423		novel transcript	NA	5.25511	4.68695	1.04322	4.49277	7.03014e-06	9.48828e-05	up-regulated
ENSG00000251442	LINC01094	long intergenic non-protein coding RNA 1094 [Source:HGNC Symbol;Acc:HGNC:49219]	NA	2580.52	3.7738	0.753434	5.0088	5.47705e-07	9.76115e-06	up-regulated
ENSG00000251448		novel transcript	NA	50.8866	4.39791	0.476193	9.23557	2.56908e-20	2.4781e-18	up-regulated
ENSG00000251459		novel transcript	NA	5.89912	4.3496	0.74607	5.83001	5.54247e-09	1.50355e-07	up-regulated
ENSG00000251491	OR7E28P	olfactory receptor family 7 subfamily E member 28 pseudogene [Source:HGNC Symbol;Acc:HGNC:8400]	NA	11.1637	-2.23459	0.576139	-3.87856	0.000105078	0.000967916	down-regulated
ENSG00000251533	LINC00605	long intergenic non-protein coding RNA 605 [Source:HGNC Symbol;Acc:HGNC:43928]	100131366	54.0937	-3.03832	0.758567	-4.00534	6.19282e-05	0.000617402	down-regulated
ENSG00000251538	LINC02201	long intergenic non-protein coding RNA 2201 [Source:HGNC Symbol;Acc:HGNC:53067]	101927379	7.05089	-4.67955	1.12631	-4.15478	3.25604e-05	0.000359471	down-regulated
ENSG00000251576	LINC01267	long intergenic non-protein coding RNA 1267 [Source:HGNC Symbol;Acc:HGNC:50320]	101927565	29.7406	-3.23447	0.716474	-4.51443	6.34873e-06	8.64318e-05	down-regulated
ENSG00000251613		novel transcript	NA	6.93953	3.037	0.666777	4.55475	5.24482e-06	7.30255e-05	up-regulated
ENSG00000251660		novel transcript	NA	1569.99	3.61871	0.304384	11.8887	1.35577e-32	3.23192e-30	up-regulated
ENSG00000251664	PCDHA12	protocadherin alpha 12 [Source:HGNC Symbol;Acc:HGNC:8666]	56137	969.304	2.47493	0.543184	4.55633	5.20551e-06	7.26133e-05	up-regulated
ENSG00000252965		Y RNA [Source:RFAM;Acc:RF00019]	NA	16.7927	2.02505	0.521593	3.88243	0.00010342	0.000954992	up-regulated
ENSG00000253159	PCDHGA12	protocadherin gamma subfamily A, 12 [Source:HGNC Symbol;Acc:HGNC:8699]	26025	16290.1	2.25407	0.409668	5.5022	3.75085e-08	8.64987e-07	up-regulated
ENSG00000253181		novel transcript	NA	1.62275	3.98044	1.00079	3.97729	6.97048e-05	0.000682745	up-regulated
ENSG00000253223		PRP3 pre-mRNA processing factor 3 homolog (S. cerevisiae) (PRPF3) pseudogene	NA	15.289	4.192	0.506612	8.27457	1.28916e-16	8.93485e-15	up-regulated
ENSG00000253305	PCDHGB6	protocadherin gamma subfamily B, 6 [Source:HGNC Symbol;Acc:HGNC:8713]	56100	16112.3	2.24611	0.40399	5.5598	2.70078e-08	6.44229e-07	up-regulated
ENSG00000253485	PCDHGA5	protocadherin gamma subfamily A, 5 [Source:HGNC Symbol;Acc:HGNC:8703]	56110	16121.8	2.25103	0.411559	5.46951	4.51282e-08	1.02015e-06	up-regulated
ENSG00000253537	PCDHGA7	protocadherin gamma subfamily A, 7 [Source:HGNC Symbol;Acc:HGNC:8705]	56108	15941.6	2.24934	0.413369	5.44148	5.2841e-08	1.17786e-06	up-regulated
ENSG00000253553		novel transcript, antisense to MMP16	NA	29.7464	2.55485	0.472427	5.40792	6.37608e-08	1.40042e-06	up-regulated
ENSG00000253661	ZFHX4-AS1	ZFHX4 antisense RNA 1 [Source:HGNC Symbol;Acc:HGNC:44165]	NA	21.4288	2.27615	0.511763	4.44766	8.68107e-06	0.000113605	up-regulated
ENSG00000253666		novel transcript	NA	6.90987	2.7719	0.709798	3.90519	9.41512e-05	0.000882249	up-regulated
ENSG00000253731	PCDHGA6	protocadherin gamma subfamily A, 6 [Source:HGNC Symbol;Acc:HGNC:8704]	56109	16051	2.22796	0.403803	5.51746	3.43938e-08	8.00512e-07	up-regulated
ENSG00000253767	PCDHGA8	protocadherin gamma subfamily A, 8 [Source:HGNC Symbol;Acc:HGNC:8706]	9708	15898.1	2.2324	0.40756	5.47748	4.31424e-08	9.82146e-07	up-regulated
ENSG00000253809		novel transcript	NA	10.0901	3.8898	0.826184	4.70815	2.4997e-06	3.80919e-05	up-regulated
ENSG00000253824		novel transcript	NA	2.08775	3.99525	0.936866	4.26449	2.00363e-05	0.000235366	up-regulated
ENSG00000253846	PCDHGA10	protocadherin gamma subfamily A, 10 [Source:HGNC Symbol;Acc:HGNC:8697]	56106	16072.8	2.2472	0.403041	5.5756	2.46678e-08	5.94474e-07	up-regulated
ENSG00000253851		novel transcript	NA	2146.38	6.43293	0.432617	14.8698	5.17758e-50	4.30614e-47	up-regulated
ENSG00000253873	PCDHGA11	protocadherin gamma subfamily A, 11 [Source:HGNC Symbol;Acc:HGNC:8698]	56105	15950.7	2.23775	0.411313	5.44049	5.31333e-08	1.18367e-06	up-regulated
ENSG00000253910	PCDHGB2	protocadherin gamma subfamily B, 2 [Source:HGNC Symbol;Acc:HGNC:8709]	56103	16074.6	2.25186	0.417264	5.39673	6.7867e-08	1.48451e-06	up-regulated
ENSG00000253953	PCDHGB4	protocadherin gamma subfamily B, 4 [Source:HGNC Symbol;Acc:HGNC:8711]	8641	16005.5	2.22554	0.410728	5.41853	6.00922e-08	1.32685e-06	up-regulated
ENSG00000253992		novel transcript	NA	76.8838	8.98372	0.841149	10.6803	1.25867e-26	2.00455e-24	up-regulated
ENSG00000254031		novel transcript	NA	102.872	-3.51899	0.888318	-3.96141	7.45083e-05	0.000722235	down-regulated
ENSG00000254040		novel transcript	NA	11.1472	3.27831	0.842785	3.88985	0.000100306	0.000930377	up-regulated
ENSG00000254054		novel transcript	NA	19.1723	2.80622	0.59054	4.75196	2.01457e-06	3.13111e-05	up-regulated
ENSG00000254122	PCDHGB7	protocadherin gamma subfamily B, 7 [Source:HGNC Symbol;Acc:HGNC:8714]	56099	16372.6	2.21369	0.413492	5.35364	8.62014e-08	1.83932e-06	up-regulated
ENSG00000254166	CASC19	cancer susceptibility 19 [Source:HGNC Symbol;Acc:HGNC:49476]	103164619	55.8049	-3.13273	0.805464	-3.88935	0.000100514	0.000931838	down-regulated
ENSG00000254221	PCDHGB1	protocadherin gamma subfamily B, 1 [Source:HGNC Symbol;Acc:HGNC:8708]	56104	16015.7	2.25993	0.419133	5.39191	6.97113e-08	1.52307e-06	up-regulated
ENSG00000254245	PCDHGA3	protocadherin gamma subfamily A, 3 [Source:HGNC Symbol;Acc:HGNC:8701]	56112	15983.4	2.25326	0.420806	5.35462	8.57361e-08	1.83148e-06	up-regulated
ENSG00000254348		patched homolog 1 (Drosophila) (PTCH1) pseudogene	NA	19.9242	2.83253	0.633949	4.46807	7.89297e-06	0.000104827	up-regulated
ENSG00000254535	PABPC4L	poly(A) binding protein cytoplasmic 4 like [Source:HGNC Symbol;Acc:HGNC:31955]	132430	90.8029	-2.47428	0.472552	-5.236	1.64092e-07	3.29367e-06	down-regulated
ENSG00000254593	OR7E126P	olfactory receptor family 7 subfamily E member 126 pseudogene [Source:HGNC Symbol;Acc:HGNC:15304]	NA	41.6665	-2.7336	0.66497	-4.11086	3.94181e-05	0.000423439	down-regulated
ENSG00000254639		novel transcript	NA	6.46224	-3.02571	0.769662	-3.93121	8.45185e-05	0.000803656	down-regulated
ENSG00000254706		novel protein	NA	181.682	3.01329	0.414374	7.27192	3.54405e-13	1.658e-11	up-regulated
ENSG00000254717	GLYATL1P2	glycine-N-acyltransferase like 1 pseudogene 2 [Source:HGNC Symbol;Acc:HGNC:37863]	NA	2.51887	3.58329	0.894119	4.00763	6.13317e-05	0.000611944	up-regulated
ENSG00000254731		novel transcript	NA	7.92046	4.08689	0.859591	4.75446	1.98977e-06	3.09772e-05	up-regulated
ENSG00000254740		novel transcript, antisense to USP2	NA	49.7997	3.14553	0.234063	13.4388	3.58293e-41	1.57758e-38	up-regulated
ENSG00000254815	LMNTD2-AS1	LMNTD2 antisense RNA 1 [Source:HGNC Symbol;Acc:HGNC:41204]	692247	379.072	-2.74455	0.512762	-5.35248	8.67587e-08	1.85016e-06	down-regulated
ENSG00000254844		novel transcript, antisense to FXYD2	NA	28.1809	-3.01714	0.504971	-5.97487	2.30268e-09	6.69101e-08	down-regulated
ENSG00000254919		novel transcript	NA	21.3952	6.28693	0.790102	7.95711	1.76099e-15	1.06645e-13	up-regulated
ENSG00000254944	ATP5PBP5	ATP synthase peripheral stalk-membrane subunit b pseudogene 5 [Source:HGNC Symbol;Acc:HGNC:39746]	NA	45.1491	2.00217	0.418057	4.78923	1.67423e-06	2.65845e-05	up-regulated
ENSG00000254980		novel transcript	NA	86.083	5.83796	0.516297	11.3074	1.20638e-29	2.40158e-27	up-regulated
ENSG00000255020	TDH-AS1	TDH antisense RNA 1 [Source:HGNC Symbol;Acc:HGNC:55510]	100129129	142.63	5.08488	0.496491	10.2416	1.29033e-24	1.77544e-22	up-regulated
ENSG00000255027		novel transcript, antisense to DDX25	NA	12.2853	3.0448	0.563349	5.40482	6.48745e-08	1.42321e-06	up-regulated
ENSG00000255082	GRM5-AS1	GRM5 antisense RNA 1 [Source:HGNC Symbol;Acc:HGNC:40265]	100873989	130.207	4.74943	0.622445	7.63027	2.34255e-14	1.25067e-12	up-regulated
ENSG00000255085		zinc finger protein 154 (ZNF154) pseudogene	NA	79.6658	2.21115	0.492785	4.48705	7.22165e-06	9.70279e-05	up-regulated
ENSG00000255100	TSKU-AS1	TSKU antisense RNA 1 [Source:HGNC Symbol;Acc:HGNC:55509]	101928837	37.076	-2.66737	0.66753	-3.99587	6.44567e-05	0.000638866	down-regulated
ENSG00000255126		novel transcript	NA	271.484	2.2385	0.548197	4.08338	4.43859e-05	0.000466625	up-regulated
ENSG00000255129	TTC12-DT	TTC12 divergent transcript [Source:HGNC Symbol;Acc:HGNC:55508]	NA	208.98	2.64364	0.420149	6.29216	3.13074e-10	1.02422e-08	up-regulated
ENSG00000255202		novel transcript	NA	54.9065	2.60368	0.449309	5.79484	6.83849e-09	1.82162e-07	up-regulated
ENSG00000255277	ABCC6P2	ATP binding cassette subfamily C member 6 pseudogene 2 [Source:HGNC Symbol;Acc:HGNC:33353]	730013	6.59408	2.63268	0.609799	4.31728	1.57963e-05	0.000190707	up-regulated
ENSG00000255330		novel protein	NA	1037.81	3.43055	0.212548	16.1402	1.33211e-58	1.60825e-55	up-regulated
ENSG00000255366		novel transcript	NA	67.5116	3.15288	0.566941	5.56121	2.67907e-08	6.41093e-07	up-regulated
ENSG00000255372		novel transcript	NA	6.74953	3.06152	0.621963	4.92236	8.55068e-07	1.45794e-05	up-regulated
ENSG00000255406	LINC02730	long intergenic non-protein coding RNA 2730 [Source:HGNC Symbol;Acc:HGNC:54247]	NA	7.78156	4.65845	0.88488	5.26449	1.40575e-07	2.86021e-06	up-regulated
ENSG00000255408	PCDHA3	protocadherin alpha 3 [Source:HGNC Symbol;Acc:HGNC:8669]	56145	1025.27	2.40526	0.56949	4.22354	2.40492e-05	0.00027545	up-regulated
ENSG00000255521	CD44-DT	CD44 divergent transcript [Source:HGNC Symbol;Acc:HGNC:56175]	100507144	64.5055	4.10542	0.319567	12.8468	8.96088e-38	3.07679e-35	up-regulated
ENSG00000255537		novel transcript, antisense to FEZ1	403312	66.3271	5.71312	0.554563	10.302	6.90056e-25	9.81978e-23	up-regulated
ENSG00000255542		novel transcript	NA	29.5405	5.09282	1.02793	4.95446	7.25317e-07	1.25326e-05	up-regulated
ENSG00000255571	MIR9-3HG	MIR9-3 host gene [Source:HGNC Symbol;Acc:HGNC:27388]	254559	362.597	4.04752	0.495412	8.17	3.08388e-16	2.05735e-14	up-regulated
ENSG00000255572		novel transcript	NA	4.16276	3.42408	0.758487	4.51436	6.35087e-06	8.64318e-05	up-regulated
ENSG00000255690	TRIL	TLR4 interactor with leucine rich repeats [Source:HGNC Symbol;Acc:HGNC:22200]	9865	2836.61	4.46194	0.53971	8.26728	1.37053e-16	9.46373e-15	up-regulated
ENSG00000255750		novel transcript, antisense to SSPN	NA	797.32	3.03824	0.35764	8.49525	1.97508e-17	1.46957e-15	up-regulated
ENSG00000255794	RMST	rhabdomyosarcoma 2 associated transcript [Source:HGNC Symbol;Acc:HGNC:29893]	196475	74.4959	2.51149	0.552111	4.54889	5.39287e-06	7.48363e-05	up-regulated
ENSG00000256124	LINC01152	long intergenic non-protein coding RNA 1152 [Source:HGNC Symbol;Acc:HGNC:16752]	102606463	107.861	2.87797	0.546684	5.26441	1.40639e-07	2.86021e-06	up-regulated
ENSG00000256268	LINC02454	long intergenic non-protein coding RNA 2454 [Source:HGNC Symbol;Acc:HGNC:53387]	NA	47.7337	-2.59687	0.53747	-4.83166	1.354e-06	2.20745e-05	down-regulated
ENSG00000256306		novel transcript, antisense to GRIN2B	NA	4.21522	4.39666	0.956502	4.59661	4.2943e-06	6.12961e-05	up-regulated
ENSG00000256340	ABCC6P1	ATP binding cassette subfamily C member 6 pseudogene 1 [Source:HGNC Symbol;Acc:HGNC:33352]	653190	12.4033	3.83911	0.784428	4.89416	9.87278e-07	1.65102e-05	up-regulated
ENSG00000256341		novel transcript	NA	75.1128	2.63027	0.560062	4.69639	2.64805e-06	4.01239e-05	up-regulated
ENSG00000256463	SALL3	spalt like transcription factor 3 [Source:HGNC Symbol;Acc:HGNC:10527]	27164	249.418	5.24916	0.97376	5.39061	7.02185e-08	1.53236e-06	up-regulated
ENSG00000256988		new variant	NA	91.5143	3.70005	0.495024	7.47448	7.75095e-14	3.90953e-12	up-regulated
ENSG00000257045		novel transcript, antisense to SATB homeobox 2	NA	20.6548	2.75097	0.588442	4.675	2.93951e-06	4.40232e-05	up-regulated
ENSG00000257057	C11orf97	chromosome 11 open reading frame 97 [Source:HGNC Symbol;Acc:HGNC:49544]	643037	15.6038	5.39556	0.781577	6.90344	5.07593e-12	2.04932e-10	up-regulated
ENSG00000257060		novel transcript	NA	24.9174	3.91946	0.580722	6.74928	1.48576e-11	5.7149e-10	up-regulated
ENSG00000257096		novel transcript	NA	435.805	2.42648	0.545702	4.44653	8.72683e-06	0.00011404	up-regulated
ENSG00000257139	LINC02821	long intergenic non-protein coding RNA 2821 [Source:HGNC Symbol;Acc:HGNC:54352]	NA	11.9961	2.63344	0.675092	3.90086	9.58518e-05	0.000894601	up-regulated
ENSG00000257185	LINC02293	long intergenic non-protein coding RNA 2293 [Source:HGNC Symbol;Acc:HGNC:53209]	NA	7.42608	4.9186	0.874023	5.62754	1.82796e-08	4.50679e-07	up-regulated
ENSG00000257319	DBX2-AS1	DBX2 antisense RNA 1 [Source:HGNC Symbol;Acc:HGNC:55479]	NA	25.6644	4.4273	1.06418	4.16031	3.17819e-05	0.000352436	up-regulated
ENSG00000257467	PPFIA2-AS1	PPFIA2 antisense RNA 1 [Source:HGNC Symbol;Acc:HGNC:53397]	102724663	17.4862	3.23254	0.696616	4.64035	3.47815e-06	5.10684e-05	up-regulated
ENSG00000257556	LINC02298	long intergenic non-protein coding RNA 2298 [Source:HGNC Symbol;Acc:HGNC:53216]	NA	142.272	-2.7082	0.635971	-4.25837	2.05921e-05	0.000241139	down-regulated
ENSG00000257585	LINC00609	long intergenic non-protein coding RNA 609 [Source:HGNC Symbol;Acc:HGNC:43960]	101101773	6.95061	6.47993	0.997018	6.49932	8.06859e-11	2.83013e-09	up-regulated
ENSG00000257703		novel transcript	NA	56.5208	8.21402	0.81764	10.046	9.56635e-24	1.22195e-21	up-regulated
ENSG00000257711		novel transcript, antisense to RFX4	100505978	103.495	4.32781	0.619481	6.98618	2.82475e-12	1.1799e-10	up-regulated
ENSG00000257735		novel transcript, antisense to ZNF641	NA	20.9047	2.65743	0.603611	4.40255	1.06988e-05	0.000136194	up-regulated
ENSG00000257826		novel transcript	NA	5.04209	4.03345	0.899417	4.48452	7.30794e-06	9.80537e-05	up-regulated
ENSG00000257860		novel transcript	101929058	6.78931	5.07978	0.92842	5.47142	4.4644e-08	1.01141e-06	up-regulated
ENSG00000257906	LINC02156	long intergenic non-protein coding RNA 2156 [Source:HGNC Symbol;Acc:HGNC:53017]	NA	9.51236	2.24329	0.454379	4.93704	7.93188e-07	1.36047e-05	up-regulated
ENSG00000257918		novel transcript, antisense to RFX4	NA	322.62	7.26654	0.440513	16.4956	3.94417e-61	5.67748e-58	up-regulated
ENSG00000257964		novel transcript, antisense to PRPF40B	NA	10.7807	-3.04507	0.74888	-4.06616	4.77932e-05	0.000496863	down-regulated
ENSG00000258081		novel transcript	NA	10.2315	3.66631	0.83073	4.41336	1.01777e-05	0.000130509	up-regulated
ENSG00000258116	PPIAP45	peptidylprolyl isomerase A pseudogene 45 [Source:HGNC Symbol;Acc:HGNC:53669]	NA	10.9094	3.3188	0.819923	4.0477	5.17226e-05	0.000530057	up-regulated
ENSG00000258197	NKX2-2-AS1	NKX2-2 antisense RNA 1 [Source:HGNC Symbol;Acc:HGNC:37154]	NA	106.004	5.21355	0.871646	5.98128	2.21395e-09	6.46329e-08	up-regulated
ENSG00000258249		novel transcript	NA	8.94359	3.35658	0.837414	4.00826	6.11677e-05	0.00061047	up-regulated
ENSG00000258342		novel transcript, sense overlapping BRMS1L	NA	19.3448	5.02411	0.831642	6.04119	1.52981e-09	4.5767e-08	up-regulated
ENSG00000258444		novel transcript, antisense to MYH7	NA	22.6087	5.52675	0.680104	8.12632	4.42519e-16	2.90047e-14	up-regulated
ENSG00000258483	LINC02251	long intergenic non-protein coding RNA 2251 [Source:HGNC Symbol;Acc:HGNC:53149]	105371008	48.1446	8.62772	0.887554	9.72078	2.45885e-22	2.79711e-20	up-regulated
ENSG00000258498	DIO3OS	DIO3 opposite strand upstream RNA [Source:HGNC Symbol;Acc:HGNC:20348]	64150	208.936	-2.3829	0.507891	-4.69176	2.7086e-06	4.09418e-05	down-regulated
ENSG00000258520		novel transcript	NA	61.0605	2.74605	0.377766	7.26918	3.61678e-13	1.68991e-11	up-regulated
ENSG00000258584	FAM181A-AS1	FAM181A antisense RNA 1 [Source:HGNC Symbol;Acc:HGNC:20133]	283592	93.7572	6.5873	0.660659	9.9708	2.04576e-23	2.52689e-21	up-regulated
ENSG00000258660		novel transcript, antisense to DNAL1	NA	201.464	2.7192	0.315818	8.61001	7.30528e-18	5.69598e-16	up-regulated
ENSG00000258663		novel transcript, antisense to MEG3	NA	549.246	-2.17263	0.409954	-5.29969	1.16e-07	2.41056e-06	down-regulated
ENSG00000258672		novel transcript	NA	38.5835	4.40674	0.439454	10.0278	1.15095e-23	1.46019e-21	up-regulated
ENSG00000258673	LINC01397	long intergenic non-protein coding RNA 1397 [Source:HGNC Symbol;Acc:HGNC:50677]	104355139	35.1981	-2.9395	0.607668	-4.83735	1.3158e-06	2.15232e-05	down-regulated
ENSG00000258754	LINC01579	long intergenic non-protein coding RNA 1579 [Source:HGNC Symbol;Acc:HGNC:27519]	105369203	145.373	4.71693	0.746552	6.31829	2.64479e-10	8.75963e-09	up-regulated
ENSG00000258844		novel transcript	NA	24.7963	6.03347	0.970627	6.21606	5.09801e-10	1.62381e-08	up-regulated
ENSG00000258846	EEF1A1P33	eukaryotic translation elongation factor 1 alpha 1 pseudogene 33 [Source:HGNC Symbol;Acc:HGNC:37911]	NA	8.55222	4.52003	0.798452	5.66098	1.50507e-08	3.76026e-07	up-regulated
ENSG00000258851		novel transcript, antisense to BAG5	NA	8.06272	2.5107	0.546451	4.59455	4.33675e-06	6.17608e-05	up-regulated
ENSG00000258888		novel transcript	NA	3.32604	5.06463	0.963762	5.25506	1.47975e-07	2.99196e-06	up-regulated
ENSG00000258952	SALRNA1	senescence associated long non-coding RNA 1 [Source:HGNC Symbol;Acc:HGNC:49001]	NA	24.4635	-4.16369	0.797226	-5.22272	1.76314e-07	3.5081e-06	down-regulated
ENSG00000259038		novel transcript, antisense to RAD51L1	NA	61.6757	3.46637	0.532386	6.51101	7.46464e-11	2.62321e-09	up-regulated
ENSG00000259129	LINC00648	long intergenic non-protein coding RNA 648 [Source:HGNC Symbol;Acc:HGNC:44302]	100506433	62.2774	3.01307	0.64699	4.65706	3.2076e-06	4.75336e-05	up-regulated
ENSG00000259164		novel protein	NA	148.917	2.24058	0.358462	6.25052	4.09078e-10	1.32212e-08	up-regulated
ENSG00000259175		novel transcript, antisense to ARNT2	101929586	158.209	3.50864	0.403567	8.69407	3.49683e-18	2.82662e-16	up-regulated
ENSG00000259218	LINC00928	long intergenic non-protein coding RNA 928 [Source:HGNC Symbol;Acc:HGNC:27535]	283761	12.7103	3.94421	0.741178	5.32155	1.02888e-07	2.16452e-06	up-regulated
ENSG00000259223		novel transcript	NA	11.8015	5.37858	0.849563	6.331	2.43578e-10	8.11044e-09	up-regulated
ENSG00000259251	VPS13C-DT	VPS13C divergent transcript [Source:HGNC Symbol;Acc:HGNC:55425]	NA	30.6482	2.87332	0.392739	7.3161	2.55275e-13	1.21551e-11	up-regulated
ENSG00000259255		novel transcript	NA	11.2864	6.19771	0.769592	8.05323	8.0635e-16	5.14114e-14	up-regulated
ENSG00000259284	LINC02349	long intergenic non-protein coding RNA 2349 [Source:HGNC Symbol;Acc:HGNC:53271]	100506530	3.32101	5.00977	1.06124	4.72068	2.35053e-06	3.59653e-05	up-regulated
ENSG00000259285	ALDH1A2-AS1	ALDH1A2 antisense RNA 1 [Source:HGNC Symbol;Acc:HGNC:27515]	NA	24.8121	-3.1563	0.810268	-3.89538	9.80447e-05	0.000912111	down-regulated
ENSG00000259356		novel transcript, antisense to ADAMTS17	NA	3.3826	4.05861	0.946258	4.28912	1.79381e-05	0.000213331	up-regulated
ENSG00000259368		novel transcript, antisense to DISP2	NA	50.7016	3.05477	0.493637	6.18829	6.08195e-10	1.91488e-08	up-regulated
ENSG00000259417	CTXND1	cortexin domain containing 1 [Source:HGNC Symbol;Acc:HGNC:50507]	100996492	891.178	6.05131	0.457833	13.2173	6.97329e-40	2.93239e-37	up-regulated
ENSG00000259425		Golgin subfamily A member 6 pseudogene	NA	13.384	2.11149	0.526414	4.01108	6.0442e-05	0.000604032	up-regulated
ENSG00000259430	CERS3-AS1	CERS3 antisense RNA 1 [Source:HGNC Symbol;Acc:HGNC:51431]	NA	47.8474	-3.55866	0.814647	-4.36835	1.2519e-05	0.000155608	down-regulated
ENSG00000259439	LINC01833	long intergenic non-protein coding RNA 1833 [Source:HGNC Symbol;Acc:HGNC:52644]	107985879	324.875	4.80261	0.729902	6.5798	4.71093e-11	1.70021e-09	up-regulated
ENSG00000259446	RYR3-DT	RYR3 divergent transcript [Source:HGNC Symbol;Acc:HGNC:51417]	101928134	18.0167	4.97865	0.923492	5.39111	7.00235e-08	1.529e-06	up-regulated
ENSG00000259475	SYNM-AS1	SYNM antisense RNA 1 [Source:HGNC Symbol;Acc:HGNC:55421]	NA	208.506	4.64859	0.543283	8.55647	1.16372e-17	8.92487e-16	up-regulated
ENSG00000259478		novel transcript	NA	12.391	3.83537	0.970911	3.95028	7.80605e-05	0.000750448	up-regulated
ENSG00000259508		novel transcript	NA	13.5201	4.86515	0.838488	5.80229	6.54167e-09	1.75253e-07	up-regulated
ENSG00000259509		cytochrome b5 type B (outer mitochondrial membrane) (CYB5B) pseudogene	NA	1.8112	4.16766	1.02343	4.07225	4.65604e-05	0.000485937	up-regulated
ENSG00000259616		novel transcript	NA	33.1634	5.39638	0.715278	7.54445	4.54217e-14	2.34914e-12	up-regulated
ENSG00000259628		novel transcript	NA	52.7254	2.14688	0.333	6.4471	1.14009e-10	3.91819e-09	up-regulated
ENSG00000259675		novel transcript	NA	15.2075	3.37913	0.72152	4.68335	2.82229e-06	4.25055e-05	up-regulated
ENSG00000259704		novel transcript, sense overlapping 3' UTR of BLM	105370969	41.1896	-2.75685	0.540135	-5.104	3.3254e-07	6.21972e-06	down-regulated
ENSG00000259705	FBN1-DT	FBN1 divergent transcript [Source:HGNC Symbol;Acc:HGNC:55413]	NA	27.6993	2.56628	0.384419	6.67575	2.45979e-11	9.18762e-10	up-regulated
ENSG00000259846		novel transcript	NA	21.4977	5.63145	0.787829	7.14807	8.80092e-13	3.86147e-11	up-regulated
ENSG00000259868		novel transcript	NA	12.372	3.29801	0.510751	6.45718	1.06675e-10	3.67626e-09	up-regulated
ENSG00000259920		novel transcript	NA	42.7878	3.73228	0.568766	6.56207	5.3066e-11	1.90783e-09	up-regulated
ENSG00000259976		novel transcript	NA	3803.51	2.0549	0.256272	8.01843	1.07104e-15	6.73691e-14	up-regulated
ENSG00000259992		ADAT1 and TMEM231 readthrough transcript	NA	305.085	2.06985	0.312532	6.62284	3.52358e-11	1.29542e-09	up-regulated
ENSG00000260071		novel transcript	101927026	18.2583	4.68086	0.776741	6.02629	1.67768e-09	4.99116e-08	up-regulated
ENSG00000260092		TMEM231-CHST5 readthrough protein	NA	163.575	2.40918	0.287993	8.36542	5.99018e-17	4.26214e-15	up-regulated
ENSG00000260187	PPIAP48	peptidylprolyl isomerase A pseudogene 48 [Source:HGNC Symbol;Acc:HGNC:53672]	NA	7.16929	4.41133	0.864101	5.10511	3.3061e-07	6.19289e-06	up-regulated
ENSG00000260260	SNHG19	small nucleolar RNA host gene 19 [Source:HGNC Symbol;Acc:HGNC:49574]	NA	1085.52	-2.5011	0.601268	-4.15971	3.18652e-05	0.000353149	down-regulated
ENSG00000260370		novel transcript	NA	2.43477	4.59884	0.95835	4.79871	1.59693e-06	2.55742e-05	up-regulated
ENSG00000260372	AQP4-AS1	AQP4 antisense RNA 1 [Source:HGNC Symbol;Acc:HGNC:26399]	NA	285.07	5.23676	0.569044	9.20274	3.48946e-20	3.30624e-18	up-regulated
ENSG00000260398		novel transcript, overlapping to PKIA	NA	70.3039	3.46723	0.387083	8.95732	3.32664e-19	2.91576e-17	up-regulated
ENSG00000260466		novel transcript, antisense to SLC7A5	NA	188.594	2.22624	0.484807	4.59202	4.38973e-06	6.24676e-05	up-regulated
ENSG00000260467		novel transcript, antisense to CCDC135 and GPR97	NA	32.9342	3.2489	0.519493	6.25399	4.00104e-10	1.29423e-08	up-regulated
ENSG00000260578		novel transcript	NA	16.1989	2.21599	0.504956	4.38847	1.14149e-05	0.000143831	up-regulated
ENSG00000260604		novel transcript	NA	52.3942	4.5547	0.483791	9.41461	4.7483e-21	4.94055e-19	up-regulated
ENSG00000260664		novel transcript	NA	176.03	3.62339	0.545968	6.63663	3.20933e-11	1.18571e-09	up-regulated
ENSG00000260740		novel transcript, antisense to SLC5A2	NA	16.6548	-2.52074	0.639191	-3.94364	8.02557e-05	0.000768787	down-regulated
ENSG00000260860		calponin 2 (CNN2) pseudogene	NA	13.0021	-5.58769	1.357	-4.11769	3.82697e-05	0.000413595	down-regulated
ENSG00000260878		novel transcript, overlapping GABRA2	NA	17.6195	4.66052	0.902297	5.16517	2.4022e-07	4.63665e-06	up-regulated
ENSG00000260918		novel transcript, overlapping GABRB1	NA	205.797	5.39944	0.433246	12.4627	1.19199e-35	3.45824e-33	up-regulated
ENSG00000260947		novel transcript	NA	106.273	3.49921	0.678355	5.15837	2.49105e-07	4.78103e-06	up-regulated
ENSG00000260990		novel transcript	NA	75.8424	7.25908	0.540602	13.4278	4.15799e-41	1.8095e-38	up-regulated
ENSG00000261033	SPECC1-DT	SPECC1 divergent transcript [Source:HGNC Symbol;Acc:HGNC:55376]	NA	21.2898	3.18538	0.554532	5.74428	9.23149e-09	2.4043e-07	up-regulated
ENSG00000261054		novel transcript, antisense to SYNM	NA	3897.71	5.80521	0.504686	11.5026	1.27987e-30	2.676e-28	up-regulated
ENSG00000261115	TMEM178B	transmembrane protein 178B [Source:HGNC Symbol;Acc:HGNC:44112]	100507421	640.349	2.72864	0.35214	7.74874	9.28106e-15	5.21551e-13	up-regulated
ENSG00000261120		novel transcript, antisense to LRRC9	NA	19.7117	4.45151	0.764279	5.82445	5.72995e-09	1.55061e-07	up-regulated
ENSG00000261189	DSP-AS1	DSP antisense RNA 1 [Source:HGNC Symbol;Acc:HGNC:56039]	NA	121.45	-3.09964	0.473077	-6.55209	5.67365e-11	2.03004e-09	down-regulated
ENSG00000261208		novel Pumilio domain-containing protein KIAA0020 pseudogene	NA	13.9682	-2.74337	0.701309	-3.91179	9.16163e-05	0.000861082	down-regulated
ENSG00000261211		novel transcript	NA	19.0459	-2.1756	0.539591	-4.03193	5.53201e-05	0.000560887	down-regulated
ENSG00000261377	PDCD6IPP2	PDCD6IP pseudogene 2 [Source:HGNC Symbol;Acc:HGNC:49873]	NA	82.6784	2.21935	0.427126	5.19602	2.03603e-07	3.98448e-06	up-regulated
ENSG00000261439	GNAO1-AS1	GNAO1 antisense RNA 1 [Source:HGNC Symbol;Acc:HGNC:24498]	26077	79.3102	4.89876	0.475017	10.3128	6.16783e-25	8.84434e-23	up-regulated
ENSG00000261478		novel transcript	NA	15.2139	4.53685	0.784234	5.78507	7.24833e-09	1.92122e-07	up-regulated
ENSG00000261572		novel transcript, intronic to CMTM8	NA	111.079	-2.2859	0.569894	-4.0111	6.04366e-05	0.000604032	down-regulated
ENSG00000261617	LINC02177	long intergenic non-protein coding RNA 2177 [Source:HGNC Symbol;Acc:HGNC:53039]	101927009	153.631	7.79532	0.572608	13.6137	3.31969e-42	1.59285e-39	up-regulated
ENSG00000261634	PAQR5-DT	PAQR5 divergent transcript [Source:HGNC Symbol;Acc:HGNC:55353]	NA	19.5978	-2.91371	0.720065	-4.04645	5.19999e-05	0.000532754	down-regulated
ENSG00000261675		novel transcript	NA	18.4361	3.12527	0.73832	4.23294	2.30653e-05	0.000265613	up-regulated
ENSG00000261701	HPR	haptoglobin-related protein [Source:HGNC Symbol;Acc:HGNC:5156]	3250	339.292	7.30638	0.821712	8.89165	6.02072e-19	5.18004e-17	up-regulated
ENSG00000261770		novel transcript	NA	44.7075	-2.20837	0.509482	-4.33453	1.4607e-05	0.000177899	down-regulated
ENSG00000261829		novel transcript	NA	23.2696	4.2136	0.748596	5.62866	1.81613e-08	4.48355e-07	up-regulated
ENSG00000261889		novel transcript	NA	29.2891	-3.00598	0.558098	-5.38611	7.19971e-08	1.56752e-06	down-regulated
ENSG00000261934	PCDHGA9	protocadherin gamma subfamily A, 9 [Source:HGNC Symbol;Acc:HGNC:8707]	56107	16201.7	2.21706	0.414999	5.34233	9.17598e-08	1.94572e-06	up-regulated
ENSG00000262003		novel transcript, antisense to NXN	101927727	21.556	-4.01872	0.881494	-4.55899	5.13997e-06	7.18597e-05	down-regulated
ENSG00000262116		novel transcript, antisense to SHISA9	NA	19.5605	5.72186	0.617322	9.26883	1.88193e-20	1.83419e-18	up-regulated
ENSG00000262209	PCDHGB3	protocadherin gamma subfamily B, 3 [Source:HGNC Symbol;Acc:HGNC:8710]	56102	15909.4	2.24729	0.414183	5.42583	5.76872e-08	1.27979e-06	up-regulated
ENSG00000262412		novel transcript	NA	23.6718	3.34697	0.419437	7.97968	1.46712e-15	9.03099e-14	up-regulated
ENSG00000262576	PCDHGA4	protocadherin gamma subfamily A, 4 [Source:HGNC Symbol;Acc:HGNC:8702]	56111	16105.8	2.25868	0.419738	5.38117	7.40025e-08	1.60931e-06	up-regulated
ENSG00000262801		novel transcript	NA	10.2648	3.57206	0.716201	4.98751	6.11613e-07	1.07719e-05	up-regulated
ENSG00000263146	LINC01896	long intergenic non-protein coding RNA 1896 [Source:HGNC Symbol;Acc:HGNC:52715]	NA	218.754	5.76973	0.749736	7.69569	1.40737e-14	7.70063e-13	up-regulated
ENSG00000263155	MYZAP	myocardial zonula adherens protein [Source:HGNC Symbol;Acc:HGNC:43444]	100820829	384.401	2.0733	0.337334	6.14613	7.93959e-10	2.47416e-08	up-regulated
ENSG00000263316		novel transcript, antisense to ALOX12P2	NA	38.8618	-2.7729	0.710968	-3.90018	9.61212e-05	0.000896668	down-regulated
ENSG00000263325		novel transcript, antisense to PRSS22	NA	19.5863	-2.28472	0.538358	-4.24388	2.19691e-05	0.000254793	down-regulated
ENSG00000263424		novel transcript, antisense to DSEL	NA	274.31	2.56109	0.3333	7.68403	1.5416e-14	8.39823e-13	up-regulated
ENSG00000263684		novel transcript, antisense to DNAH9	NA	39.8084	6.1932	0.567821	10.9069	1.0678e-27	1.86745e-25	up-regulated
ENSG00000263874	LINC00672	long intergenic non-protein coding RNA 672 [Source:HGNC Symbol;Acc:HGNC:44353]	NA	174.053	2.13523	0.34962	6.10728	1.01344e-09	3.1125e-08	up-regulated
ENSG00000263961	RHEX	regulator of hemoglobinization and erythroid cell expansion [Source:HGNC Symbol;Acc:HGNC:25341]	440712	113.761	-2.21161	0.445197	-4.96772	6.77464e-07	1.17984e-05	down-regulated
ENSG00000264340		novel transcript, antisense to CNDP1	NA	10.5528	5.15608	1.08494	4.7524	2.01014e-06	3.12554e-05	up-regulated
ENSG00000264449		novel transcript, antisense to TMEM200C	121725015	217.612	3.31293	0.628213	5.27358	1.33789e-07	2.73318e-06	up-regulated
ENSG00000264589	MAPT-AS1	MAPT antisense RNA 1 [Source:HGNC Symbol;Acc:HGNC:43738]	NA	146.996	4.99404	0.569836	8.764	1.8844e-18	1.55343e-16	up-regulated
ENSG00000264843		novel transcript, antisense to PIEZO2	NA	32.6841	-3.55921	0.59884	-5.9435	2.78995e-09	7.99514e-08	down-regulated
ENSG00000264895		novel transcript, sense intronic to MBTD1	NA	73.5511	-2.63537	0.663517	-3.97182	7.13241e-05	0.000695512	down-regulated
ENSG00000264954	PRR29-AS1	PRR29 antisense RNA 1 [Source:HGNC Symbol;Acc:HGNC:51822]	400612	52.6056	2.87764	0.527533	5.4549	4.89999e-08	1.09878e-06	up-regulated
ENSG00000264982		novel transcript, antisense to FAM59A	NA	95.5896	2.45338	0.546742	4.48727	7.21428e-06	9.69833e-05	up-regulated
ENSG00000265126		novel transcript, antisense to RNF112	NA	59.7284	4.14815	0.500691	8.28485	1.18255e-16	8.24173e-15	up-regulated
ENSG00000265168		novel transcript, antisense to ALDOC	NA	1427.5	3.722	0.358337	10.3869	2.84579e-25	4.14422e-23	up-regulated
ENSG00000265304	MIR3650	microRNA 3650 [Source:HGNC Symbol;Acc:HGNC:38981]	100500824	41.0697	3.29723	0.406929	8.10271	5.37473e-16	3.48622e-14	up-regulated
ENSG00000265452	MIR3682	microRNA 3682 [Source:HGNC Symbol;Acc:HGNC:38916]	100500850	110.063	3.53216	0.402022	8.78597	1.55019e-18	1.28357e-16	up-regulated
ENSG00000265519		novel transcript	NA	123.008	2.02278	0.403869	5.00851	5.4852e-07	9.77101e-06	up-regulated
ENSG00000265535	RN7SL475P	RNA, 7SL, cytoplasmic 475, pseudogene [Source:HGNC Symbol;Acc:HGNC:46491]	NA	2.5675	5.03981	1.00359	5.02176	5.1199e-07	9.16829e-06	up-regulated
ENSG00000265657	MIR3151	microRNA 3151 [Source:HGNC Symbol;Acc:HGNC:38266]	100422992	7.29896	4.94088	0.710442	6.95465	3.53435e-12	1.4584e-10	up-regulated
ENSG00000265787	CYP4F35P	cytochrome P450 family 4 subfamily F member 35, pseudogene [Source:HGNC Symbol;Acc:HGNC:39954]	284233	29.064	-2.13228	0.512124	-4.1636	3.13263e-05	0.000348209	down-regulated
ENSG00000266010	GATA6-AS1	GATA6 antisense RNA 1 (head to head) [Source:HGNC Symbol;Acc:HGNC:48840]	100128893	22.6588	-3.00716	0.70706	-4.25304	2.10884e-05	0.000245874	down-regulated
ENSG00000266050		family with sequence similarity 27-like (FAM27L) pseudogene	NA	20.2382	3.12627	0.601575	5.19681	2.02741e-07	3.97391e-06	up-regulated
ENSG00000266075	RN7SL574P	RNA, 7SL, cytoplasmic 574, pseudogene [Source:HGNC Symbol;Acc:HGNC:46590]	NA	7.37752	-2.41147	0.619757	-3.891	9.9833e-05	0.000926904	down-regulated
ENSG00000266213		novel transcript	NA	3.69816	4.53002	1.06549	4.25157	2.12274e-05	0.000247186	up-regulated
ENSG00000266283		novel transcript, antisense to GATA6	NA	53.7889	-2.90749	0.666859	-4.35999	1.30071e-05	0.000160927	down-regulated
ENSG00000266325	MIR3665	microRNA 3665 [Source:HGNC Symbol;Acc:HGNC:38939]	100500861	61.2193	3.17801	0.530456	5.99109	2.08443e-09	6.09944e-08	up-regulated
ENSG00000266378		novel transcript	NA	45.4368	-3.83599	0.725863	-5.28473	1.25888e-07	2.59728e-06	down-regulated
ENSG00000266578		novel transcript	NA	17.8047	4.35967	0.753055	5.78931	7.06763e-09	1.87598e-07	up-regulated
ENSG00000266844		novel transcript, antisense to MBP	NA	875.661	5.36877	0.592586	9.0599	1.30574e-19	1.18326e-17	up-regulated
ENSG00000266846		novel transcript, antisense to L3MBTL4	NA	51.1256	2.62613	0.517125	5.07833	3.80768e-07	7.00965e-06	up-regulated
ENSG00000266946	MRPL37P1	mitochondrial ribosomal protein L37 pseudogene 1 [Source:HGNC Symbol;Acc:HGNC:31003]	NA	10.8354	-3.36455	0.813813	-4.1343	3.56034e-05	0.000388369	down-regulated
ENSG00000267014	LINC01532	long intergenic non-protein coding RNA 1532 [Source:HGNC Symbol;Acc:HGNC:51272]	NA	239.422	7.14581	0.9657	7.39962	1.36578e-13	6.6993e-12	up-regulated
ENSG00000267056		inositol polyphosphate multikinase (IPMK) pseudogene	NA	33.8422	5.35309	0.693577	7.71809	1.18082e-14	6.51817e-13	up-regulated
ENSG00000267110		novel transcript	NA	86.9124	2.02328	0.414153	4.88534	1.03253e-06	1.72055e-05	up-regulated
ENSG00000267128	RNF157-AS1	RNF157 antisense RNA 1 [Source:HGNC Symbol;Acc:HGNC:44127]	NA	686.686	3.93302	0.464905	8.45984	2.67741e-17	1.94951e-15	up-regulated
ENSG00000267279		novel transcript	NA	33.0397	-2.23338	0.543319	-4.11062	3.94599e-05	0.000423692	down-regulated
ENSG00000267314		novel protein, readthrough VMAC-CAPS	NA	2266.14	4.14951	0.245817	16.8805	6.26126e-64	1.11588e-60	up-regulated
ENSG00000267325	LINC01415	long intergenic non-protein coding RNA 1415 [Source:HGNC Symbol;Acc:HGNC:50709]	NA	43.5353	2.81147	0.659177	4.26513	1.9979e-05	0.000234768	up-regulated
ENSG00000267327		novel transcript	107985164	26.0424	3.85183	0.587783	6.55314	5.63382e-11	2.01965e-09	up-regulated
ENSG00000267328		novel transcript	NA	740.277	2.36577	0.578018	4.09291	4.26001e-05	0.000451146	up-regulated
ENSG00000267339	LINC00906	long intergenic non-protein coding RNA 906 [Source:HGNC Symbol;Acc:HGNC:27121]	148145	47.1372	4.51435	0.793236	5.69106	1.26252e-08	3.20781e-07	up-regulated
ENSG00000267414	SETBP1-DT	SETBP1 divergent transcript [Source:HGNC Symbol;Acc:HGNC:54819]	101927943	118.681	-2.10774	0.510768	-4.1266	3.68163e-05	0.000399619	down-regulated
ENSG00000267498	UQCRFS1-DT	UQCRFS1 divergent transcript [Source:HGNC Symbol;Acc:HGNC:55295]	105372352	33.7674	2.34659	0.477673	4.91255	8.98981e-07	1.52035e-05	up-regulated
ENSG00000267530	LINC01836	long intergenic non-protein coding RNA 1836 [Source:HGNC Symbol;Acc:HGNC:52652]	107985343	70.9539	-2.87614	0.683351	-4.20887	2.5665e-05	0.000291868	down-regulated
ENSG00000267577	DNAAF3-AS1	DNAAF3 antisense RNA 1 [Source:HGNC Symbol;Acc:HGNC:55292]	NA	100.311	2.6587	0.314525	8.45307	2.83738e-17	2.05798e-15	up-regulated
ENSG00000267586	LINC00907	long intergenic non-protein coding RNA 907 [Source:HGNC Symbol;Acc:HGNC:44327]	284260	29.1175	2.84668	0.583093	4.88203	1.04997e-06	1.7465e-05	up-regulated
ENSG00000267594	CYP4F24P	cytochrome P450 family 4 subfamily F member 24, pseudogene [Source:HGNC Symbol;Acc:HGNC:39945]	NA	120.245	4.29767	0.994983	4.31934	1.56494e-05	0.000189239	up-regulated
ENSG00000267683		novel transcript	NA	4.45404	4.4534	0.946403	4.70561	2.53113e-06	3.85552e-05	up-regulated
ENSG00000267698		novel transcript, antisense to CLIP3 and THAP8	NA	653.974	3.07928	0.252826	12.1794	3.9998e-34	1.06168e-31	up-regulated
ENSG00000267746		novel transcript, antisense to NOL4	NA	15.802	3.3872	0.477358	7.09572	1.28681e-12	5.53566e-11	up-regulated
ENSG00000267765		novel transcript, antisense to CNTNAP1	NA	310.91	3.03714	0.319921	9.49341	2.23605e-21	2.40478e-19	up-regulated
ENSG00000267892		novel transcript, antisense to CAPN12	NA	52.9218	-2.98131	0.601507	-4.9564	7.18105e-07	1.24252e-05	down-regulated
ENSG00000268089	GABRQ	gamma-aminobutyric acid type A receptor subunit theta [Source:HGNC Symbol;Acc:HGNC:14454]	55879	328.63	3.42712	0.871596	3.932	8.4241e-05	0.00080122	up-regulated
ENSG00000268191		novel transcript, antisense to TUBB4A	NA	566.247	2.91833	0.586997	4.97163	6.6391e-07	1.16001e-05	up-regulated
ENSG00000268203		novel transcript, antisense to TUBB4A	NA	412.766	2.84755	0.595956	4.77812	1.76939e-06	2.79296e-05	up-regulated
ENSG00000268496		novel transcript, sense intronic to TTYH1	NA	23.7548	4.27225	0.746171	5.72556	1.03096e-08	2.66284e-07	up-regulated
ENSG00000268673		novel transcript	NA	37.4433	4.03986	1.00722	4.01092	6.04836e-05	0.000604126	up-regulated
ENSG00000268873		novel transcript, antisense to DTNA	NA	276.808	5.88412	0.383736	15.3338	4.54876e-53	4.15224e-50	up-regulated
ENSG00000269086	LINC02965	long intergenic non-protein coding RNA 2965 [Source:HGNC Symbol;Acc:HGNC:56003]	NA	23.9369	-2.39391	0.577675	-4.14405	3.41228e-05	0.00037473	down-regulated
ENSG00000269113	TRABD2B	TraB domain containing 2B [Source:HGNC Symbol;Acc:HGNC:44200]	388630	867.677	-3.10247	0.551242	-5.62815	1.82148e-08	4.49378e-07	down-regulated
ENSG00000269139		novel transcript, antisense to CTXN1 and TIMM44	NA	304.519	2.02034	0.251196	8.04286	8.77685e-16	5.5675e-14	up-regulated
ENSG00000269256		novel transcript, antisense to C10orf11	NA	6.7737	2.77456	0.631273	4.39518	1.10679e-05	0.000140131	up-regulated
ENSG00000269416	LINC01224	long intergenic non-protein coding RNA 1224 [Source:HGNC Symbol;Acc:HGNC:49676]	104472717	10.1586	3.09056	0.529504	5.8367	5.32444e-09	1.45137e-07	up-regulated
ENSG00000269445		novel transcript, antisense to RYR1	NA	56.9533	5.77408	0.514805	11.2161	3.40094e-29	6.62935e-27	up-regulated
ENSG00000269694		novel transcript, antisense to CERS1	NA	15.899	4.01457	0.487314	8.23818	1.74857e-16	1.1942e-14	up-regulated
ENSG00000269699	ZIM2	zinc finger imprinted 2 [Source:HGNC Symbol;Acc:HGNC:12875]	23619	132.458	2.84107	0.519084	5.47324	4.41883e-08	1.0023e-06	up-regulated
ENSG00000269821	KCNQ1OT1	KCNQ1 opposite strand/antisense transcript 1 [Source:HGNC Symbol;Acc:HGNC:6295]	10984	1005.39	-2.54221	0.549889	-4.62314	3.77973e-06	5.48721e-05	down-regulated
ENSG00000269966		novel transcript	NA	691.519	3.18296	0.484794	6.56559	5.18274e-11	1.86509e-09	up-regulated
ENSG00000270001		novel transcript	NA	30.142	2.72625	0.429815	6.34285	2.25552e-10	7.53707e-09	up-regulated
ENSG00000270002		novel transcript, antisense to GRID1	NA	81.7509	4.52513	0.413692	10.9384	7.55169e-28	1.33316e-25	up-regulated
ENSG00000270084	GAS5-AS1	GAS5 antisense RNA 1 [Source:HGNC Symbol;Acc:HGNC:44119]	NA	494.257	-2.17814	0.510908	-4.26328	2.01451e-05	0.000236422	down-regulated
ENSG00000270096		novel transcript, antisense to LRRC34	NA	141.262	2.71471	0.287102	9.45556	3.21304e-21	3.40655e-19	up-regulated
ENSG00000270135		novel transcript, antisense to LRRC34	NA	60.4911	2.79007	0.355462	7.84913	4.18929e-15	2.45365e-13	up-regulated
ENSG00000270301		ferritin, light polypeptide (FTL) pseudogene	NA	4.28066	3.36184	0.744195	4.51741	6.25993e-06	8.53184e-05	up-regulated
ENSG00000270442		peptidylprolyl isomerase G (cyclophilin G) (PPIG) pseudogene	NA	8.39895	-5.89541	1.43801	-4.09971	4.13669e-05	0.000440705	down-regulated
ENSG00000270607	NAV2-AS6	NAV2 antisense RNA 6 [Source:HGNC Symbol;Acc:HGNC:55264]	NA	157.358	3.09232	0.563414	5.48854	4.05273e-08	9.28826e-07	up-regulated
ENSG00000270689	BUD13P1	BUD13 homolog pseudogene 1 [Source:HGNC Symbol;Acc:HGNC:51560]	NA	14.3583	2.3311	0.491907	4.73889	2.14889e-06	3.31784e-05	up-regulated
ENSG00000270765	GAS2L2	growth arrest specific 2 like 2 [Source:HGNC Symbol;Acc:HGNC:24846]	246176	99.9417	4.73937	0.519135	9.12935	6.89122e-20	6.33687e-18	up-regulated
ENSG00000270781		ribosomal protein L37 (RPL37) pseudogene	NA	8.33958	-2.7612	0.684929	-4.03136	5.54547e-05	0.000561995	down-regulated
ENSG00000270866		novel transcript	NA	6.64761	5.04937	0.809224	6.23977	4.38218e-10	1.41142e-08	up-regulated
ENSG00000270919		novel transcript, antisense to ARNT2	NA	253.349	3.82545	0.509909	7.50222	6.27439e-14	3.1949e-12	up-regulated
ENSG00000270933		novel transcript	NA	29.7946	-2.83188	0.635695	-4.45478	8.3981e-06	0.000110361	down-regulated
ENSG00000271141		novel transcript	NA	19.2014	-2.77725	0.638113	-4.35228	1.34726e-05	0.000165973	down-regulated
ENSG00000271167	LINC01109	long intergenic non-protein coding RNA 1109 [Source:HGNC Symbol;Acc:HGNC:49235]	NA	7.18145	3.84119	0.807808	4.75508	1.98372e-06	3.08959e-05	up-regulated
ENSG00000271366		novel transcript	NA	9.90176	-3.32875	0.694999	-4.78958	1.67127e-06	2.65489e-05	down-regulated
ENSG00000271384		novel transcript	NA	35.5175	-4.25546	0.964495	-4.41211	1.02369e-05	0.000131117	down-regulated
ENSG00000271533		novel transcript, sense intronic FTX	NA	249.259	-2.04915	0.516804	-3.96504	7.33828e-05	0.000713357	down-regulated
ENSG00000271538	LINC02427	long intergenic non-protein coding RNA 2427 [Source:HGNC Symbol;Acc:HGNC:53358]	NA	35.7773	2.22533	0.401593	5.54125	3.00315e-08	7.09571e-07	up-regulated
ENSG00000271563	HIRAP1	histone cell cycle regulator pseudogene 1 [Source:HGNC Symbol;Acc:HGNC:44916]	NA	4.13281	4.70419	0.8889	5.29215	1.20886e-07	2.50513e-06	up-regulated
ENSG00000271714		novel transcript, antisense to FAM169A	NA	149.091	2.56821	0.604824	4.24621	2.17412e-05	0.000252385	up-regulated
ENSG00000271743		novel transcript	NA	41.6163	2.08915	0.474896	4.39916	1.0867e-05	0.000138101	up-regulated
ENSG00000271781		novel transcript, antisense to TPPP	NA	22.2068	-2.05593	0.524429	-3.92032	8.84333e-05	0.000834941	down-regulated
ENSG00000271894		novel transcript	NA	290.425	3.32682	0.496188	6.70476	2.01744e-11	7.6037e-10	up-regulated
ENSG00000271959		novel transcript, antisense to MROH5	NA	32.5684	-2.64457	0.564553	-4.68436	2.80831e-06	4.23124e-05	down-regulated
ENSG00000272070		novel transcript	NA	56.2672	2.48049	0.379976	6.52802	6.6643e-11	2.35522e-09	up-regulated
ENSG00000272158		novel transcript, antisense to CHURC1-FNTB	NA	12.6984	2.11141	0.491367	4.29702	1.73108e-05	0.000206972	up-regulated
ENSG00000272163		novel transcript, antisense to NEFM	NA	96.7202	2.32401	0.557824	4.16621	3.09708e-05	0.000344564	up-regulated
ENSG00000272205	POU2F1-DT	POU2F1 divergent transcript [Source:HGNC Symbol;Acc:HGNC:55222]	NA	19.2229	-3.04626	0.625249	-4.87207	1.10435e-06	1.83125e-05	down-regulated
ENSG00000272239		novel transcript, antisense to DPYSL3	NA	3.94592	3.10476	0.797617	3.89254	9.91981e-05	0.000921238	up-regulated
ENSG00000272296	SNORD96A	small nucleolar RNA, C/D box 96A [Source:HGNC Symbol;Acc:HGNC:32758]	619571	42.825	-2.10683	0.475463	-4.43112	9.37443e-06	0.000121442	down-regulated
ENSG00000272372		novel transcript, antisense to GNAO1	NA	39.1352	4.66168	0.504531	9.23962	2.47366e-20	2.39222e-18	up-regulated
ENSG00000272405		novel transcript, antisense to BCAN	NA	229.036	4.36706	0.393357	11.102	1.22646e-28	2.26117e-26	up-regulated
ENSG00000272425		novel transcript	NA	56.8323	2.17624	0.394027	5.52308	3.33104e-08	7.78686e-07	up-regulated
ENSG00000272512		novel transcript	NA	64.5111	-2.42875	0.40361	-6.01755	1.77078e-09	5.24532e-08	down-regulated
ENSG00000272514	CFAP206	cilia and flagella associated protein 206 [Source:HGNC Symbol;Acc:HGNC:21405]	154313	170.484	4.04958	0.36036	11.2376	2.66565e-29	5.22327e-27	up-regulated
ENSG00000272676	OR5AO1P	olfactory receptor family 5 subfamily AO member 1 pseudogene [Source:HGNC Symbol;Acc:HGNC:31285]	NA	3.0858	4.59409	0.912358	5.0354	4.76848e-07	8.60073e-06	up-regulated
ENSG00000272694		novel transcript, antisense to ELFN2	NA	21.9399	3.90451	0.726668	5.37316	7.73676e-08	1.67622e-06	up-regulated
ENSG00000272865		novel transcript, antisense to PLD5	NA	44.5149	3.78542	0.916283	4.13128	3.60744e-05	0.000392591	up-regulated
ENSG00000272931	LRRC8D-DT	LRRC8D divergent transcript [Source:HGNC Symbol;Acc:HGNC:55186]	NA	30.0766	-2.41571	0.549166	-4.39887	1.08818e-05	0.000138242	down-regulated
ENSG00000273055		novel transcript, antisense to LAMB1	NA	93.1818	-2.96707	0.493357	-6.01404	1.80955e-09	5.34947e-08	down-regulated
ENSG00000273079	GRIN2B	glutamate ionotropic receptor NMDA type subunit 2B [Source:HGNC Symbol;Acc:HGNC:4586]	2904	208.149	5.27175	0.632679	8.33244	7.91952e-17	5.59237e-15	up-regulated
ENSG00000273124		novel transcript	NA	8.16201	4.0728	0.705608	5.77204	7.83192e-09	2.06421e-07	up-regulated
ENSG00000273138		novel transcript, antisense to PON2	NA	504.463	2.32206	0.321713	7.21779	5.28398e-13	2.3769e-11	up-regulated
ENSG00000273167		novel transcript	NA	504.445	2.0204	0.40917	4.9378	7.90084e-07	1.35579e-05	up-regulated
ENSG00000273259		novel protein	NA	19114.5	3.60967	0.577765	6.24765	4.16686e-10	1.34555e-08	up-regulated
ENSG00000273409	LINC02712	long intergenic non-protein coding RNA 2712 [Source:HGNC Symbol;Acc:HGNC:54229]	101929497	25.4483	3.69682	0.763968	4.83897	1.30511e-06	2.13577e-05	up-regulated
ENSG00000273449		novel transcript	NA	22.6952	-2.41047	0.461832	-5.21938	1.79525e-07	3.56441e-06	down-regulated
ENSG00000273471		novel transcript	NA	32.6445	-2.85572	0.697299	-4.0954	4.21438e-05	0.000447835	down-regulated
ENSG00000273487		novel transcript	NA	44.4562	3.09403	0.367834	8.41148	4.04861e-17	2.91391e-15	up-regulated
ENSG00000273492	APP-DT	APP divergent transcript [Source:HGNC Symbol;Acc:HGNC:55075]	NA	75.3312	2.93159	0.500169	5.8612	4.59525e-09	1.26271e-07	up-regulated
ENSG00000273570			NA	2.97121	3.8401	0.881589	4.35588	1.32531e-05	0.00016343	up-regulated
ENSG00000273796		novel transcript	NA	64.6388	-2.1823	0.563785	-3.8708	0.000108477	0.000994336	down-regulated
ENSG00000274168	RN7SL585P	RNA, 7SL, cytoplasmic 585, pseudogene [Source:HGNC Symbol;Acc:HGNC:46601]	NA	4.70744	5.91642	0.875294	6.75935	1.38612e-11	5.37028e-10	up-regulated
ENSG00000274225		novel transcript	NA	28.7184	-2.50277	0.558929	-4.4778	7.54165e-06	0.000100728	down-regulated
ENSG00000274230			NA	2.32697	4.19335	1.02306	4.09882	4.15253e-05	0.000442141	up-regulated
ENSG00000274330		ADAM metallopeptidase domain 20 (ADAM20) pseudogene	NA	8.71543	4.71423	0.802426	5.87498	4.22904e-09	1.17068e-07	up-regulated
ENSG00000274331		novel transcript	NA	32.0135	8.03827	0.912885	8.80534	1.30456e-18	1.08258e-16	up-regulated
ENSG00000274355	FAM74A3	family with sequence similarity 74 member A3 [Source:HGNC Symbol;Acc:HGNC:32031]	NA	3.66715	4.16211	1.01902	4.0844	4.41908e-05	0.000465205	up-regulated
ENSG00000274422		novel transcript	NA	585.248	-2.55623	0.604226	-4.23058	2.33089e-05	0.000268171	down-regulated
ENSG00000274520			NA	9.9326	4.22674	0.967448	4.36895	1.24843e-05	0.000155228	up-regulated
ENSG00000274547			NA	38.8507	4.86434	0.680479	7.14841	8.77898e-13	3.85636e-11	up-regulated
ENSG00000274682		novel transcript, sense intronic to CNTN1	NA	5.86151	5.19644	1.05166	4.94116	7.76598e-07	1.33509e-05	up-regulated
ENSG00000274698		novel transcript	NA	12.3012	2.34799	0.557651	4.21051	2.54798e-05	0.000290026	up-regulated
ENSG00000275097		novel transcript, overlapping 3'UTR of FAM60A	NA	318.925	-2.02448	0.403515	-5.01711	5.24545e-07	9.3707e-06	down-regulated
ENSG00000275167	MIR6815	microRNA 6815 [Source:HGNC Symbol;Acc:HGNC:50225]	102465489	24.486	-2.63606	0.625279	-4.21582	2.48878e-05	0.000284238	down-regulated
ENSG00000275221	H2AC15	H2A clustered histone 15 [Source:HGNC Symbol;Acc:HGNC:4726]	8330	9.01243	2.30309	0.515906	4.46417	8.03802e-06	0.000106226	up-regulated
ENSG00000275358		novel transcript	NA	7.83692	3.18089	0.723496	4.39656	1.09982e-05	0.000139295	up-regulated
ENSG00000275393		novel transcript, sense intronic to C16orf74	NA	11.8245	-2.20268	0.484051	-4.5505	5.35174e-06	7.43482e-05	down-regulated
ENSG00000275395	FCGBP	Fc gamma binding protein [Source:HGNC Symbol;Acc:HGNC:13572]	8857	9876.18	3.02223	0.702779	4.3004	1.70491e-05	0.000204186	up-regulated
ENSG00000275465		novel transcript	158434	25.2954	3.74497	0.763038	4.90797	9.20254e-07	1.55143e-05	up-regulated
ENSG00000275678		novel transcript, sense intronic to C1orf141	NA	17.6358	5.21319	0.719992	7.24062	4.46653e-13	2.04608e-11	up-regulated
ENSG00000275830		novel transcript	NA	224.789	6.40822	0.571966	11.2038	3.90425e-29	7.571e-27	up-regulated
ENSG00000275971			NA	7.13032	3.48056	0.85101	4.08992	4.31523e-05	0.00045622	up-regulated
ENSG00000276048			NA	4.49277	3.29623	0.78066	4.22236	2.41752e-05	0.000276777	up-regulated
ENSG00000276074			NA	43.8833	5.08944	0.681997	7.46255	8.48617e-14	4.25172e-12	up-regulated
ENSG00000276127		coiled-coil domain containing 112 (CCDC112) pseudogene	NA	18.7228	5.12682	0.839607	6.10621	1.02023e-09	3.12867e-08	up-regulated
ENSG00000276229			NA	17.2429	5.3722	0.657594	8.16948	3.09713e-16	2.06251e-14	up-regulated
ENSG00000276233			NA	6.92246	5.44704	1.00744	5.40683	6.41492e-08	1.40812e-06	up-regulated
ENSG00000276251		novel transcript	NA	7.71775	2.66188	0.528402	5.0376	4.71393e-07	8.51055e-06	up-regulated
ENSG00000276269		novel transcript	NA	26.4607	6.86126	0.973708	7.04653	1.83435e-12	7.79254e-11	up-regulated
ENSG00000276376		U7 small nuclear RNA [Source:RFAM;Acc:RF00066]	NA	32.383	2.01583	0.262562	7.67754	1.62175e-14	8.80921e-13	up-regulated
ENSG00000276398			NA	8.88592	3.39597	0.711154	4.7753	1.79442e-06	2.82512e-05	up-regulated
ENSG00000276476		long intergenic non-protein coding RNA 540 [Source:NCBI gene (formerly Entrezgene);Acc:100506622]	100506622	19.907	-3.16853	0.724716	-4.3721	1.23055e-05	0.000153413	down-regulated
ENSG00000276547	PCDHGB5	protocadherin gamma subfamily B, 5 [Source:HGNC Symbol;Acc:HGNC:8712]	56101	16146.5	2.20961	0.418433	5.28069	1.28695e-07	2.6421e-06	up-regulated
ENSG00000276600	RAB7B	RAB7B, member RAS oncogene family [Source:HGNC Symbol;Acc:HGNC:30513]	338382	1724.25	-2.29182	0.330185	-6.94101	3.89307e-12	1.59761e-10	down-regulated
ENSG00000276670			NA	15.7057	5.16714	0.753961	6.85333	7.21529e-12	2.88504e-10	up-regulated
ENSG00000276690			NA	379.799	7.39042	0.403683	18.3075	7.21445e-75	2.25007e-71	up-regulated
ENSG00000276844	SNORD115-46	small nucleolar RNA, C/D box 115-46 [Source:HGNC Symbol;Acc:HGNC:42798]	100873857	4.73488	3.82499	0.82963	4.61048	4.01742e-06	5.7896e-05	up-regulated
ENSG00000276908	MIR7106	microRNA 7106 [Source:HGNC Symbol;Acc:HGNC:50085]	102466222	50.3076	3.12061	0.330152	9.45204	3.32276e-21	3.51292e-19	up-regulated
ENSG00000276975	HYDIN2	HYDIN axonemal central pair apparatus protein 2 (pseudogene) [Source:HGNC Symbol;Acc:HGNC:33129]	NA	106.349	2.57909	0.537599	4.79743	1.60715e-06	2.57048e-05	up-regulated
ENSG00000277034		Small nucleolar RNA SNORA71 [Source:RFAM;Acc:RF00056]	NA	14.9537	-2.03363	0.411356	-4.94373	7.66405e-07	1.31939e-05	down-regulated
ENSG00000277081			NA	19.332	2.69916	0.5196	5.19468	2.05068e-07	4.00776e-06	up-regulated
ENSG00000277215	SPANXA2-OT1	SPANXA2 overlapping transcript 1 [Source:HGNC Symbol;Acc:HGNC:31683]	619455	17.9174	2.72417	0.517555	5.26353	1.41314e-07	2.87124e-06	up-regulated
ENSG00000277269			NA	6.44327	4.69881	0.826424	5.68572	1.30266e-08	3.30306e-07	up-regulated
[truncated: 255 more rows]
